# Supplementary material for: Comparing different farming habitats for mid-water rope nurseries to advance coral restoration efforts in the Maldives
Source: PeerJ journal article supplement (doi:10.7717/peerj.12874), 2022-02-24

# Experimental Design for *Pocillopora verrucosa*

## 1. Donor Collection:

Athuruga  
Artificial Structures

Thudufushi  
Inner reef flat

## 2. Donor Farming:

Reef Nursery  
Athuruga

Lagoon Nursery  
Athuruga

## 3. Donor Fragmentation:

7 Colonies

7 Colonies

## 4. Experimental Farming:

Reef 5m  
7 x 8 fragments  
+  
7 x 8 fragments  
=  
112 fragments

Reef 10m  
7 x 8 fragments  
+  
7 x 8 fragments  
=  
112 fragments

Reef 15m  
7 x 8 fragments  
+  
7 x 8 fragments  
=  
112 fragments

Lagoon 5m  
7 x 8 fragments  
+  
7 x 8 fragments  
=  
112 fragments

## 5. Analysis:

Fragment: *Survival, Condition, Growth, Predation, Fauna*

Donor Farming Habitat: *Growth*

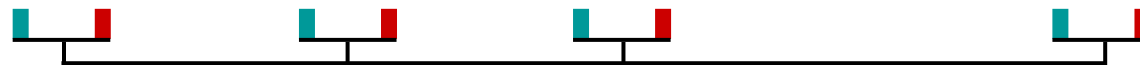

Supplement: Figure_S1.pdf [file Figure_S1.pdf]
