# Supplementary material for: Comparing different farming habitats for mid-water rope nurseries to advance coral restoration efforts in the Maldives
Source: PeerJ. 2022 Feb 24;10:e12874. doi: 10.7717/peerj.12874 (PMC8882334; doi:10.7717/peerj.12874)
Supplement: Supplemental Information 2 — The data comprises detailed information on Pocillopora and Acropora fragment health over the one-year study period in a lagoon and reef nursery. Furthermore 3 size measurements for each fragment are shown for three growth surveys. [file peerj-10-12874-s002.xlsx]

## Sheet: Legend
VARIABLE	VALUES	DESCRIPTION
Fragment_ID	1,2,3…	Fragment ID number - consecutive numbering
Habitat	Reef; Lagoon	Nursing Habitat
Colony	1,2,3…	Fragment Donor - Colony that was nursed in 2018/19 and used for fragmentation
Genus	POC; ACR	Pocillopora; Acropora
Species		if ID possible
Orig_Nursery	VRR; LN; COO	Vertical Reef Rope Nursery, Lagoon Nursery, Coral of opportunity
Orig_Depth	num (m)	depth in meter at which the donor colony was reared
Orig_Position	VRR_1, LN_R1_C15	Position of Donor colony in nursery
Depth (m)	num (m)	current nursing depth of the fragment in meter
D_Group
Position	I-RR1_1, etc	Fragment position in Nursery: Nursery Number(roman)_Location (R=reef; L=lagoon)_RopeNo.(1-3)_Fragment position
Days_TX	num	days since stocking for survey TX
Survival_TX	0; 1	0=dead; 1= alive
Condition_TX	H3	Healty 100%
	H2	Healty>50%
	H1	Healty<50%
	B	Bleached
	D	Dead
Fauna_TX	0; 1	Absent/Present
FaunaType_TX	C	Trapezia sp.
	HC	Hairy Coral Crab (Cymo andreossyi)
	F	Fish
	S	Shrimp
	O	Other (see field notes)
Predation_TX	0; 1	Absent/Present
		If not fish:
	D	Drupella
	Ph	Phestilla
	O	Other
Predation%_TX	%	Percentage of living coral affected by predation
	0
	5	>0 to <5 %
	10	>5to <10 %
Disease_TX	0; 1	Absent/Present
M1_TX	num	max length in millimeter
M2_TX	num	max witdth in millimeter (90° from max length)
M3_TX	num	max depth in millimeter (90° from max length)
General	N/A	Data not assessed or available

## Sheet: POC HEALTH
Fragment_ID	Habitat	Colony	Genus	Species	Orig_Nursery	Orig_Position	Depth	D_Group	Position	Days_T0	Survival_T0	Condition_T0	Fauna_T0	FaunaType_T0	Predation_T0	Predation%_T0	Disease_T0	Days_T1	Survival_T1	Condition_T1	Fauna_T1	FaunaType_T1	Predation_T1	Predation%_T1	Disease_T1	Days_T2	Survival_T2	Condition_T2	Fauna_T2	FaunaType_T2	Predation_T2	Predation%_T2	Disease_T2	Days_T3	Survival_T3	Condition_T3	Fauna_T3	FaunaType_T3	Predation_T3	Predation%_T3	Disease_T3	Days_T4	Survival_T4	Condition_T4	Fauna_T4	FaunaType_T4	Predation_T4	Predation%_T4	Disease_T4
1	Reef	1	POC	P. verrucosa	VRR	VRR_1	5	1	I-RR1_1	0	1	H3	0		0	0	0	28	1	H3	0		0	0	0	60	1	H3	0		0	0	0	240	1	H3	0		1	5	0	273	1	H3	0		1	5	0
2	Reef	1	POC	P. verrucosa	VRR	VRR_1	5	1	I-RR1_2	0	1	H3	0		0	0	0	28	1	H3	0		0	0	0	60	1	H3	0		0	0	0	240	1	H3	0		1	5	0	273	1	H3	0		1	5	0
3	Reef	1	POC	P. verrucosa	VRR	VRR_1	5	1	I-RR1_3	0	1	H3	0		0	0	0	28	1	H3	0		0	0	0	60	1	H3	0		0	0	0	240	1	H3	0		1	5	0	273	1	H3	0		1	5	0
4	Reef	1	POC	P. verrucosa	VRR	VRR_1	5	1	I-RR1_4	0	1	H3	0		0	0	0	28	1	H3	0		0	0	0	60	1	H3	0		0	0	0	240	1	H3	0		1	5	0	273	1	H3	0		1	5	0
5	Reef	1	POC	P. verrucosa	VRR	VRR_1	5	1	I-RR1_5	0	1	H3	0		0	0	0	28	1	H3	0		0	0	0	60	1	H3	0		0	0	0	240	1	H3	0		1	5	0	273	1	H3	0		1	5	0
6	Reef	1	POC	P. verrucosa	VRR	VRR_1	5	1	I-RR1_6	0	1	H3	0		0	0	0	28	1	H3	0		0	0	0	60	1	H3	0		0	0	0	240	1	H3	0		1	5	0	273	1	H3	0		1	5	0
7	Reef	1	POC	P. verrucosa	VRR	VRR_1	5	1	I-RR1_7	0	1	H3	0		0	0	0	28	1	H3	0		0	0	0	60	1	H3	0		0	0	0	240	1	H3	0		1	5	0	273	1	H3	0		1	5	0
8	Reef	1	POC	P. verrucosa	VRR	VRR_1	5	1	I-RR1_8	0	1	H3	0		0	0	0	28	1	H3	0		0	0	0	60	1	H3	0		0	0	0	240	1	H3	0		1	5	0	273	1	H3	0		1	5	0
9	Reef	2	POC	P. verrucosa	VRR	VRR_3	5	1	I-RR1_9	0	1	H3	0		0	0	0	28	1	H3	0		0	0	0	60	1	H3	0		0	0	0	240	1	H3	0		1	5	0	273	1	H3	0		1	5	0
10	Reef	2	POC	P. verrucosa	VRR	VRR_3	5	1	I-RR1_10	0	1	H3	0		0	0	0	28	1	H3	0		0	0	0	60	1	H3	0		0	0	0	240	1	H3	0		1	5	0	273	1	H3	0		1	5	0
11	Reef	2	POC	P. verrucosa	VRR	VRR_3	5	1	I-RR1_11	0	1	H3	0		0	0	0	28	1	H3	0		0	0	0	60	1	H3	0		0	0	0	240	1	H3	0		1	5	0	273	1	H3	0		1	5	0
12	Reef	2	POC	P. verrucosa	VRR	VRR_3	5	1	I-RR1_12	0	1	H3	0		0	0	0	28	1	H3	0		0	0	0	60	1	H3	0		0	0	0	240	1	H3	0		1	5	0	273	1	H3	1	C	1	5	0
13	Reef	2	POC	P. verrucosa	VRR	VRR_3	5	1	I-RR1_13	0	1	H3	0		0	0	0	28	1	H3	0		0	0	0	60	1	H3	0		0	0	0	240	1	H3	0		1	5	0	273	1	H3	0		1	5	0
14	Reef	2	POC	P. verrucosa	VRR	VRR_3	5	1	I-RR1_14	0	1	H3	0		0	0	0	28	1	H3	0		0	0	0	60	1	H3	0		0	0	0	240	1	H3	0		1	5	0	273	1	H3	0		1	5	0
15	Reef	2	POC	P. verrucosa	VRR	VRR_3	5	1	I-RR1_15	0	1	H3	0		0	0	0	28	1	H3	0		0	0	0	60	1	H3	0		0	0	0	240	1	H3	0		1	5	0	273	1	H3	0		1	5	0
16	Reef	2	POC	P. verrucosa	VRR	VRR_3	5	1	I-RR1_16	0	1	H3	0		0	0	0	28	1	H3	0		0	0	0	60	1	H3	0		0	0	0	240	1	H3	0		1	5	0	273	1	H3	1	C	1	5	0
17	Reef	3	POC	P. verrucosa	VRR	VRR_2	5	1	I-RR1_17	0	1	H3	0		0	0	0	28	1	H3	0		0	0	0	60	1	H3	0		0	0	0	240	1	H3	0		1	5	0	273	1	H3	0		1	5	0
18	Reef	3	POC	P. verrucosa	VRR	VRR_2	5	1	I-RR1_18	0	1	H3	0		0	0	0	28	1	H3	0		0	0	0	60	1	H3	0		0	0	0	240	1	H3	0		1	5	0	273	1	H3	0		1	5	0
19	Reef	3	POC	P. verrucosa	VRR	VRR_2	5	1	I-RR1_19	0	1	H3	0		0	0	0	28	1	H3	0		0	0	0	60	1	H3	0		0	0	0	240	1	H3	1	C	1	5	0	273	1	H3	1	C	1	5	0
20	Reef	3	POC	P. verrucosa	VRR	VRR_2	5	1	I-RR1_20	0	1	H3	0		0	0	0	28	1	H3	0		0	0	0	60	1	H3	0		0	0	0	240	1	H3	0		1	5	0	273	1	H3	0		1	5	0
21	Reef	3	POC	P. verrucosa	VRR	VRR_2	5	1	I-RR1_21	0	1	H3	0		0	0	0	28	1	H3	0		0	0	0	60	1	H3	0		0	0	0	240	1	H3	0		1	5	0	273	1	H3	0		1	5	0
22	Reef	3	POC	P. verrucosa	VRR	VRR_2	5	1	I-RR1_22	0	1	H3	0		0	0	0	28	1	H3	0		0	0	0	60	1	H3	0		0	0	0	240	1	H3	0		1	5	0	273	1	H3	0		1	5	0
23	Reef	3	POC	P. verrucosa	VRR	VRR_2	5	1	I-RR1_23	0	1	H3	0		0	0	0	28	1	H3	0		0	0	0	60	1	H3	0		0	0	0	240	1	H3	0		1	5	0	273	1	H3	0		1	5	0
24	Reef	3	POC	P. verrucosa	VRR	VRR_2	5	1	I-RR1_24	0	1	H3	0		0	0	0	28	1	H3	0		0	0	0	60	1	H3	0		0	0	0	240	1	H3	0		1	5	0	273	1	H3	0		1	5	0
25	Reef	4	POC	P. verrucosa	VRR	VRR_4	5	1	I-RR1_25	0	1	H3	0		0	0	0	28	1	H3	0		0	0	0	60	1	H3	0		0	0	0	240	1	H3	0		1	5	0	273	1	H3	0		1	5	0
26	Reef	4	POC	P. verrucosa	VRR	VRR_4	5	1	I-RR1_26	0	1	H3	0		0	0	0	28	1	H3	0		0	0	0	60	1	H3	0		0	0	0	240	1	H3	0		1	5	0	273	1	H3	0		1	5	0
27	Reef	4	POC	P. verrucosa	VRR	VRR_4	5	1	I-RR1_27	0	1	H3	0		0	0	0	28	1	H3	0		0	0	0	60	1	H3	0		0	0	0	240	1	H3	0		1	5	0	273	1	H3	0		1	5	0
28	Reef	4	POC	P. verrucosa	VRR	VRR_4	5	1	I-RR1_28	0	1	H3	0		0	0	0	28	1	H3	0		0	0	0	60	1	H3	0		0	0	0	240	1	H3	0		1	5	0	273	1	H3	0		1	5	0
29	Reef	4	POC	P. verrucosa	VRR	VRR_4	5	1	I-RR1_29	0	1	H3	0		0	0	0	28	1	H3	0		0	0	0	60	1	H3	0		0	0	0	240	1	H3	0		1	5	0	273	1	H2	0		1	5	0
30	Reef	4	POC	P. verrucosa	VRR	VRR_4	5	1	I-RR1_30	0	1	H3	0		0	0	0	28	1	H3	0		0	0	0	60	1	H3	0		0	0	0	240	1	H3	0		1	5	0	273	1	H3	0		1	5	0
31	Reef	4	POC	P. verrucosa	VRR	VRR_4	5	1	I-RR1_31	0	1	H3	0		0	0	0	28	1	H3	0		0	0	0	60	1	H3	0		0	0	0	240	1	H3	0		1	5	0	273	1	H3	0		1	5	0
32	Reef	4	POC	P. verrucosa	VRR	VRR_4	5	1	I-RR1_32	0	1	H3	0		0	0	0	28	1	H3	0		0	0	0	60	1	H3	0		0	0	0	240	1	H3	0		0	0	0	273	1	H3	0		1	5	0
33	Reef	5	POC	P. verrucosa	VRR	VRR_5	5	1	I-RR1_33	0	1	H3	0		0	0	0	28	1	B	0		0	0	0	60	1	H1	0		0	0	0	240	1	H2	0		1	5	0	273	1	H2	0		1	5	1
34	Reef	5	POC	P. verrucosa	VRR	VRR_5	5	1	I-RR1_34	0	1	H3	0		0	0	0	28	1	H3	0		0	0	0	60	1	H2	0		0	0	0	240	0	D	0					273	0	D	0
35	Reef	5	POC	P. verrucosa	VRR	VRR_5	5	1	I-RR1_35	0	1	H3	0		0	0	0	28	1	H3	0		0	0	0	60	1	H3	0		0	0	0	240	0	D	0					273	0	D	0
36	Reef	5	POC	P. verrucosa	VRR	VRR_5	5	1	I-RR1_36	0	1	H3	0		0	0	0	28	1	H3	0		0	0	0	60	1	H3	0		0	0	0	240	1	H3	0		1	5	0	273	1	H2	0		1	5	1
37	Reef	5	POC	P. verrucosa	VRR	VRR_5	5	1	I-RR1_37	0	1	H3	0		0	0	0	28	1	H3	0		0	0	0	60	1	H3	0		0	0	0	240	1	H3	0		1	5	0	273	1	H2	0		1	5	1
38	Reef	5	POC	P. verrucosa	VRR	VRR_5	5	1	I-RR1_38	0	1	H3	0		0	0	0	28	1	H3	0		0	0	0	60	1	H3	0		0	0	0	240	0	D	0					273	0	D	0
39	Reef	5	POC	P. verrucosa	VRR	VRR_5	5	1	I-RR1_39	0	1	H3	0		0	0	0	28	1	H3	0		0	0	0	60	1	H3	0		0	0	0	240	0	D	0					273	0	D	0
40	Reef	5	POC	P. verrucosa	VRR	VRR_5	5	1	I-RR1_40	0	1	H3	0		0	0	0	28	1	H3	0		0	0	0	60	1	H3	0		0	0	0	240	0	D	0					273	0	D	0
41	Reef	6	POC	P. verrucosa	VRR	VRR_7	5	1	I-RR1_41	0	1	H3	0		0	0	0	28	1	H3	0		0	0	0	60	1	H3	0		0	0	0	240	0	D	0					273	0	D	0
42	Reef	6	POC	P. verrucosa	VRR	VRR_7	5	1	I-RR1_42	0	1	H3	0		0	0	0	28	1	H3	0		0	0	0	60	1	H3	0		0	0	0	240	0	D	0					273	0	D	0
43	Reef	6	POC	P. verrucosa	VRR	VRR_7	5	1	I-RR1_43	0	1	H3	0		0	0	0	28	1	H3	0		0	0	0	60	1	H3	0		0	0	0	240	0	D	0					273	0	D	0
44	Reef	6	POC	P. verrucosa	VRR	VRR_7	5	1	I-RR1_44	0	1	H3	0		0	0	0	28	1	H3	0		0	0	0	60	1	H3	0		0	0	0	240	1	H3	0		1	5	0	273	1	H3	1	HC	1	5	0
45	Reef	6	POC	P. verrucosa	VRR	VRR_7	5	1	I-RR1_45	0	1	H3	0		0	0	0	28	1	H3	0		0	0	0	60	1	H3	0		0	0	0	240	1	H3	0		1	5	0	273	1	H3	1	C	1	5	0
46	Reef	6	POC	P. verrucosa	VRR	VRR_7	5	1	I-RR1_46	0	1	H3	0		0	0	0	28	1	H3	0		0	0	0	60	1	H3	0		0	0	0	240	1	H3	1	C	1	5	0	273	1	H3	0		1	5	0
47	Reef	6	POC	P. verrucosa	VRR	VRR_7	5	1	I-RR1_47	0	1	H3	0		0	0	0	28	1	H3	0		0	0	0	60	1	H3	0		0	0	0	240	1	H3	0		1	5	0	273	1	H3	0		1	5	0
48	Reef	6	POC	P. verrucosa	VRR	VRR_7	5	1	I-RR1_48	0	1	H3	0		0	0	0	28	1	H3	0		0	0	0	60	1	H3	0		0	0	0	240	1	H3	0		1	5	0	273	1	H3	0		1	5	0
49	Reef	7	POC	P. verrucosa	VRR	VRR_8	5	1	I-RR1_49	0	1	H3	0		0	0	0	28	1	H3	0		0	0	0	60	1	H3	0		0	0	0	240	1	H3	0		1	5	0	273	1	H3	0		1	5	0
50	Reef	7	POC	P. verrucosa	VRR	VRR_8	5	1	I-RR1_50	0	1	H3	0		0	0	0	28	1	H3	0		0	0	0	60	1	H3	0		0	0	0	240	1	H3	0		1	5	0	273	1	H3	0		1	5	0
51	Reef	7	POC	P. verrucosa	VRR	VRR_8	5	1	I-RR1_51	0	1	H3	0		0	0	0	28	1	H3	0		0	0	0	60	1	H3	0		0	0	0	240	1	H3	0		1	5	0	273	1	H3	0		1	5	0
52	Reef	7	POC	P. verrucosa	VRR	VRR_8	5	1	I-RR1_52	0	1	H3	0		0	0	0	28	1	H3	0		0	0	0	60	1	H3	0		0	0	0	240	1	H3	0		1	5	0	273	1	H3	0		1	5	0
53	Reef	7	POC	P. verrucosa	VRR	VRR_8	5	1	I-RR1_53	0	1	H3	0		0	0	0	28	1	H3	0		0	0	0	60	1	H3	0		0	0	0	240	1	H3	0		1	5	0	273	1	H3	0		1	5	0
54	Reef	7	POC	P. verrucosa	VRR	VRR_8	5	1	I-RR1_54	0	1	H3	0		0	0	0	28	1	H3	0		0	0	0	60	1	H3	0		0	0	0	240	1	H3	0		1	5	0	273	1	H3	0		1	5	0
55	Reef	7	POC	P. verrucosa	VRR	VRR_8	5	1	I-RR1_55	0	1	H3	0		0	0	0	28	1	H3	0		0	0	0	60	1	H3	0		0	0	0	240	1	H3	0		1	5	0	273	1	H3	0		1	5	0
56	Reef	7	POC	P. verrucosa	VRR	VRR_8	5	1	I-RR1_56	0	1	H3	0		0	0	0	28	1	H3	0		0	0	0	60	1	H3	0		0	0	0	240	1	H3	0		1	5	0	273	1	H3	0		1	5	0
57	Reef	8	POC	P. verrucosa	LN	NR7_41	5	1	I-RR1_57	0	1	H3	0		0	0	0	28	1	H3	0		0	0	0	60	1	H3	0		0	0	0	240	1	H3	0		1	5	0	273	1	H3	0		0	0	0
58	Reef	8	POC	P. verrucosa	LN	NR7_41	5	1	I-RR1_58	0	1	H3	0		0	0	0	28	1	H3	0		0	0	0	60	1	H3	0		0	0	0	240	1	H3	1	C	1	5	0	273	1	H3	1	C	0	0	0
59	Reef	8	POC	P. verrucosa	LN	NR7_41	5	1	I-RR1_59	0	1	H3	0		0	0	0	28	1	H3	0		0	0	0	60	1	H3	0		0	0	0	240	1	H3	1	C	1	5	0	273	1	H3	1	C	0	0	0
60	Reef	8	POC	P. verrucosa	LN	NR7_41	5	1	I-RR1_60	0	1	H3	0		0	0	0	28	1	H3	0		0	0	0	60	1	H3	0		0	0	0	240	1	H3	0		1	5	0	273	1	H3	0		0	0	0
61	Reef	8	POC	P. verrucosa	LN	NR7_41	5	1	I-RR1_61	0	1	H3	0		0	0	0	28	1	H3	0		0	0	0	60	1	H3	0		0	0	0	240	1	H3	0		1	5	0	273	1	H3	1	S	0	0	0
62	Reef	8	POC	P. verrucosa	LN	NR7_41	5	1	I-RR1_62	0	1	H3	0		0	0	0	28	1	H3	0		0	0	0	60	1	H3	0		0	0	0	240	1	H3	0		1	5	0	273	1	H3	0		0	0	0
63	Reef	8	POC	P. verrucosa	LN	NR7_41	5	1	I-RR1_63	0	1	H3	0		0	0	0	28	1	H3	0		0	0	0	60	1	H3	0		0	0	0	240	1	H3	0		1	5	0	273	1	H3	0		0	0	0
64	Reef	8	POC	P. verrucosa	LN	NR7_41	5	1	I-RR1_64	0	1	H3	0		0	0	0	28	1	H3	0		0	0	0	60	1	H3	0		0	0	0	240	1	H3	0		1	5	0	273	1	H3	1	HC	0	0	0
65	Reef	9	POC	P. verrucosa	LN	NR7_19	5	1	I-RR1_65	0	1	H3	0		0	0	0	28	1	H3	0		0	0	0	60	1	H3	0		0	0	0	240	1	H3	0		1	5	0	273	1	H3	0		1	5	0
66	Reef	9	POC	P. verrucosa	LN	NR7_19	5	1	I-RR1_66	0	1	H3	0		0	0	0	28	1	H3	0		0	0	0	60	1	H3	0		0	0	0	240	1	H3	0		1	5	0	273	1	H3	0		1	5	0
67	Reef	9	POC	P. verrucosa	LN	NR7_19	5	1	I-RR1_67	0	1	H3	0		0	0	0	28	1	H3	0		0	0	0	60	1	H3	0		0	0	0	240	1	H3	0		1	5	0	273	1	H3	1	HC	1	5	0
68	Reef	9	POC	P. verrucosa	LN	NR7_19	5	1	I-RR1_68	0	1	H3	0		0	0	0	28	1	H3	0		0	0	0	60	1	H3	0		0	0	0	240	1	H3	1	C	1	5	0	273	1	H3	1	C,C	1	5	0
69	Reef	9	POC	P. verrucosa	LN	NR7_19	5	1	I-RR1_69	0	1	H3	0		0	0	0	28	1	H3	0		0	0	0	60	1	H3	0		0	0	0	240	1	H3	0		1	5	0	273	1	H3	0		1	5	0
70	Reef	9	POC	P. verrucosa	LN	NR7_19	5	1	I-RR1_70	0	1	H3	0		0	0	0	28	1	H3	0		0	0	0	60	1	H3	0		0	0	0	240	1	H3	0		1	5	0	273	1	H3	0		1	5	0
71	Reef	9	POC	P. verrucosa	LN	NR7_19	5	1	I-RR1_71	0	1	H3	0		0	0	0	28	1	H3	0		0	0	0	60	1	H3	0		0	0	0	240	1	H3	0		1	5	0	273	1	H3	0		1	5	0
72	Reef	9	POC	P. verrucosa	LN	NR7_19	5	1	I-RR1_72	0	1	H3	0		0	0	0	28	1	H3	0		0	0	0	60	1	H3	0		0	0	0	240	1	H3	1	C	1	5	0	273	1	H3	1	C	1	5	0
73	Reef	10	POC	P. verrucosa	LN	NR7_19	5	1	I-RR1_73	0	1	H3	0		0	0	0	28	1	H3	0		0	0	0	60	1	H3	0		0	0	0	240	1	H3	0		1	5	0	273	1	H3	0		0	0	0
74	Reef	10	POC	P. verrucosa	LN	NR8_46	5	1	I-RR1_74	0	1	H3	0		0	0	0	28	1	H3	0		0	0	0	60	1	H3	0		0	0	0	240	1	H3	0		1	5	0	273	1	H3	0		0	0	0
75	Reef	10	POC	P. verrucosa	LN	NR8_46	5	1	I-RR1_75	0	1	H3	0		0	0	0	28	1	H3	0		0	0	0	60	1	H3	0		0	0	0	240	1	H3	0		1	5	0	273	1	H3	1	C,C	0	0	0
76	Reef	10	POC	P. verrucosa	LN	NR8_46	5	1	I-RR1_76	0	1	H3	0		0	0	0	28	1	H3	0		0	0	0	60	1	H3	0		0	0	0	240	1	H3	0		1	5	0	273	1	H3	0		0	0	0
77	Reef	10	POC	P. verrucosa	LN	NR8_46	5	1	I-RR1_77	0	1	H3	0		0	0	0	28	1	H3	0		0	0	0	60	1	H3	0		0	0	0	240	1	H3	0		1	5	0	273	1	H3	0		0	0	0
78	Reef	10	POC	P. verrucosa	LN	NR8_46	5	1	I-RR1_78	0	1	H3	0		0	0	0	28	1	H3	0		0	0	0	60	1	H3	0		0	0	0	240	1	H3	0		1	5	0	273	1	H3	0		0	0	0
79	Reef	10	POC	P. verrucosa	LN	NR8_46	5	1	I-RR1_79	0	1	H3	0		0	0	0	28	1	H3	0		0	0	0	60	1	H3	0		0	0	0	240	1	H3	0		1	5	0	273	1	H2	0		0	0	0
80	Reef	10	POC	P. verrucosa	LN	NR8_46	5	1	I-RR1_80	0	1	H3	0		0	0	0	28	1	H3	0		0	0	0	60	1	H3	0		0	0	0	240	1	H3	1	C	1	5	0	273	1	H3	1	C,C	0	0	0
81	Reef	11	POC	P. verrucosa	LN	NR7_30	5	1	I-RR1_81	0	1	H3	0		0	0	0	28	1	H3	0		0	0	0	60	1	H3	0		0	0	0	240	1	H3	0		0	0	0	273	1	H3	0		1	5	0
82	Reef	11	POC	P. verrucosa	LN	NR7_30	5	1	I-RR1_82	0	1	H3	0		0	0	0	28	1	H3	0		0	0	0	60	1	H3	0		0	0	0	240	1	H3	1	C	0	0	0	273	1	H3	0		1	5	0
83	Reef	11	POC	P. verrucosa	LN	NR7_30	5	1	I-RR1_83	0	1	H3	0		0	0	0	28	1	H3	0		0	0	0	60	1	H3	0		0	0	0	240	1	H3	0		0	0	0	273	1	H3	0		1	5	0
84	Reef	11	POC	P. verrucosa	LN	NR7_30	5	1	I-RR1_84	0	1	H3	0		0	0	0	28	1	H3	0		0	0	0	60	1	H3	0		0	0	0	240	1	H3	0		0	0	0	273	1	H3	1	C,C	1	5	0
85	Reef	11	POC	P. verrucosa	LN	NR7_30	5	1	I-RR1_85	0	1	H3	0		0	0	0	28	1	H3	0		0	0	0	60	1	H3	0		0	0	0	240	1	H3	0		0	0	0	273	1	H3	0		1	5	0
86	Reef	11	POC	P. verrucosa	LN	NR7_30	5	1	I-RR1_86	0	1	H3	0		0	0	0	28	1	H3	0		0	0	0	60	1	H3	0		0	0	0	240	1	H3	1	C	0	0	0	273	1	H3	1	C	1	5	0
87	Reef	11	POC	P. verrucosa	LN	NR7_30	5	1	I-RR1_87	0	1	H3	0		0	0	0	28	1	H3	0		0	0	0	60	1	H3	0		0	0	0	240	1	H3	1	C	0	0	0	273	1	H3	0		1	5	0
88	Reef	11	POC	P. verrucosa	LN	NR7_30	5	1	I-RR1_88	0	1	H3	0		0	0	0	28	1	H3	0		0	0	0	60	1	H3	0		0	0	0	240	1	H3	1	C	0	0	0	273	1	H3	1	C,C	1	5	0
89	Reef	12	POC	P. verrucosa	LN	NR7_47	5	1	I-RR1_89	0	1	H3	0		0	0	0	28	1	H3	0		0	0	0	60	1	H3	0		0	0	0	240	1	H3	0		0	0	0	273	1	H3	0		1	5	0
90	Reef	12	POC	P. verrucosa	LN	NR7_47	5	1	I-RR1_90	0	1	H3	0		0	0	0	28	1	H3	0		0	0	0	60	1	H3	0		0	0	0	240	1	H3	0		0	0	0	273	1	H3	0		1	5	0
91	Reef	12	POC	P. verrucosa	LN	NR7_47	5	1	I-RR1_91	0	1	H3	0		0	0	0	28	1	H3	0		0	0	0	60	1	H3	0		0	0	0	240	1	H3	0		0	0	0	273	1	H3	0		0	0	0
92	Reef	12	POC	P. verrucosa	LN	NR7_47	5	1	I-RR1_92	0	1	H3	0		0	0	0	28	1	H3	0		0	0	0	60	1	H3	0		0	0	0	240	1	H3	1	C	0	0	0	273	1	H3	0		0	0	0
93	Reef	12	POC	P. verrucosa	LN	NR7_47	5	1	I-RR1_93	0	1	H3	0		0	0	0	28	1	H3	0		0	0	0	60	1	H3	0		0	0	0	240	1	H3	0		0	0	0	273	1	H3	1	C	0	0	0
94	Reef	12	POC	P. verrucosa	LN	NR7_47	5	1	I-RR1_94	0	1	H3	0		0	0	0	28	1	H3	0		0	0	0	60	1	H3	0		0	0	0	240	1	H3	1	C C	o	o	0	273	1	H3	1	C	0	0	0
95	Reef	12	POC	P. verrucosa	LN	NR7_47	5	1	I-RR1_95	0	1	H3	0		0	0	0	28	1	H3	0		0	0	0	60	1	H3	0		0	0	0	240	1	H3	0		0	0	0	273	1	H3	0		0	0	0
96	Reef	12	POC	P. verrucosa	LN	NR7_47	5	1	I-RR1_96	0	1	H3	0		0	0	0	28	1	H3	0		0	0	0	60	1	H3	0		0	0	0	240	1	H3	0		0	0	0	273	1	H3	0		0	0	0
97	Reef	13	POC	P. verrucosa	LN	NR8_15	5	1	I-RR1_97	0	1	H3	0		0	0	0	28	1	H3	0		0	0	0	60	1	H3	0		0	0	0	240	1	H3	0		1	5	0	273	1	H3	0		0	0	0
98	Reef	13	POC	P. verrucosa	LN	NR8_15	5	1	I-RR1_98	0	1	H3	0		0	0	0	28	1	H3	0		0	0	0	60	1	H3	0		0	0	0	240	1	H3	0		1	5	0	273	1	H3	0		1	5	0
99	Reef	13	POC	P. verrucosa	LN	NR8_15	5	1	I-RR1_99	0	1	H3	0		0	0	0	28	1	H3	0		0	0	0	60	1	H3	0		0	0	0	240	1	H3	0		1	5	0	273	1	H3	0		1	5	0
100	Reef	13	POC	P. verrucosa	LN	NR8_15	5	1	I-RR1_100	0	1	H3	0		0	0	0	28	1	H3	0		0	0	0	60	1	H3	0		0	0	0	240	1	H3	0		1	5	0	273	1	H3	0		1	5	0
101	Reef	13	POC	P. verrucosa	LN	NR8_15	5	1	I-RR1_101	0	1	H3	0		0	0	0	28	1	H3	0		0	0	0	60	1	H3	0		0	0	0	240	1	H3	0		1	5	0	273	1	H3	0		1	5	0
102	Reef	13	POC	P. verrucosa	LN	NR8_15	5	1	I-RR1_102	0	1	H3	0		0	0	0	28	1	H3	0		0	0	0	60	1	H3	0		0	0	0	240	1	H3	0		1	5	0	273	1	H3	0		1	5	0
103	Reef	13	POC	P. verrucosa	LN	NR8_15	5	1	I-RR1_103	0	1	H3	0		0	0	0	28	1	H3	0		0	0	0	60	1	H3	0		0	0	0	240	1	H3	0		1	5	0	273	1	H3	0		1	5	0
104	Reef	13	POC	P. verrucosa	LN	NR8_15	5	1	I-RR1_104	0	1	H3	0		0	0	0	28	1	H3	0		0	0	0	60	1	H3	0		0	0	0	240	1	H3	0		1	5	0	273	1	H3	1	C	1	5	0
105	Reef	14	POC	P. verrucosa	LN	NR7_25	5	1	I-RR1_105	0	1	H3	0		0	0	0	28	1	H3	0		0	0	0	60	1	H3	0		0	0	0	240	1	H3	1	C C	1	5	0	273	1	H3	0		1	5	0
106	Reef	14	POC	P. verrucosa	LN	NR7_25	5	1	I-RR1_106	0	1	H3	0		0	0	0	28	1	H3	0		0	0	0	60	1	H3	0		0	0	0	240	1	H3	0		1	5	0	273	1	H3	1	C	1	5	0
107	Reef	14	POC	P. verrucosa	LN	NR7_25	5	1	I-RR1_107	0	1	H3	0		0	0	0	28	1	H3	0		0	0	0	60	1	H3	0		0	0	0	240	1	H3	1	C	1	5	0	273	1	H3	0		1	5	0
108	Reef	14	POC	P. verrucosa	LN	NR7_25	5	1	I-RR1_108	0	1	H3	0		0	0	0	28	1	H3	0		0	0	0	60	1	H3	0		0	0	0	240	1	H3	1	C	1	5	0	273	1	H3	0		1	5	0
109	Reef	14	POC	P. verrucosa	LN	NR7_25	5	1	I-RR1_109	0	1	H3	0		0	0	0	28	1	H3	0		0	0	0	60	1	H3	0		0	0	0	240	1	H3	0		1	5	0	273	1	H3	0		1	5	0
110	Reef	14	POC	P. verrucosa	LN	NR7_25	5	1	I-RR1_110	0	1	H3	0		0	0	0	28	1	H3	0		0	0	0	60	1	H3	0		0	0	0	240	1	H3	1	C	1	5	0	273	1	H3	1	C	1	5	0
111	Reef	14	POC	P. verrucosa	LN	NR7_25	5	1	I-RR1_111	0	1	H3	0		0	0	0	28	1	H3	0		0	0	0	60	1	H3	0		0	0	0	240	1	H2	0		1	5	0	273	1	H2	0		1	5	0
112	Reef	14	POC	P. verrucosa	LN	NR7_25	5	1	I-RR1_112	0	1	H3	0		0	0	0	28	1	H3	0		0	0	0	60	1	H3	0		0	0	0	240	1	H3	0		1	5	0	273	1	H3	0		1	5	0
113	Reef	1	POC	P. verrucosa	VRR	VRR_1	10	2	I-RR2_1	0	1	H3	0		0	0	0	28	1	H3	0		0	0	0	60	1	H3	0		1	5	0	240	0	D	0					273	0	D	0
114	Reef	1	POC	P. verrucosa	VRR	VRR_1	10	2	I-RR2_2	0	1	H3	0		0	0	0	28	1	H3	0		0	0	0	60	1	H3	0		1	5	0	240	1	H3	0		1	5	0	273	1	H2	0		1	5	1
115	Reef	1	POC	P. verrucosa	VRR	VRR_1	10	2	I-RR2_3	0	1	H3	0		0	0	0	28	1	H3	0		0	0	0	60	1	H3	0		0	0	0	240	1	H2	0		1	5	0	273	1	H2	0		0	0	0
116	Reef	1	POC	P. verrucosa	VRR	VRR_1	10	2	I-RR2_4	0	1	H3	0		0	0	0	28	1	H3	0		0	0	0	60	1	H3	0		0	0	0	240	1	H3	0		1	5	0	273	1	H3	0		1	5	0
117	Reef	1	POC	P. verrucosa	VRR	VRR_1	10	2	I-RR2_5	0	1	H3	0		0	0	0	28	1	H3	0		0	0	0	60	1	H3	0		0	0	0	240	1	H3	0		1	5	0	273	1	H3	0		1	5	0
118	Reef	1	POC	P. verrucosa	VRR	VRR_1	10	2	I-RR2_6	0	1	H3	0		0	0	0	28	1	H3	0		0	0	0	60	1	H3	0		0	0	0	240	1	H3	0		1	5	0	273	1	H3	0		1	5	0
119	Reef	1	POC	P. verrucosa	VRR	VRR_1	10	2	I-RR2_7	0	1	H3	0		0	0	0	28	1	H3	0		0	0	0	60	1	H3	0		0	0	0	240	1	H3	0		1	5	0	273	1	H3	0		1	5	0
120	Reef	1	POC	P. verrucosa	VRR	VRR_1	10	2	I-RR2_8	0	1	H3	0		0	0	0	28	1	H3	0		0	0	0	60	1	H3	0		0	0	0	240	1	H3	0		1	5	0	273	1	H3	0		1	5	0
121	Reef	2	POC	P. verrucosa	VRR	VRR_3	10	2	I-RR2_9	0	1	H3	0		0	0	0	28	1	H3	0		0	0	0	60	1	H3	0		0	0	0	240	1	H3	0		1	5	0	273	1	H3	0		1	5	0
122	Reef	2	POC	P. verrucosa	VRR	VRR_3	10	2	I-RR2_10	0	1	H3	0		0	0	0	28	1	H3	0		0	0	0	60	1	H3	0		0	0	0	240	1	H3	0		1	5	0	273	1	H3	0		0	0	0
123	Reef	2	POC	P. verrucosa	VRR	VRR_3	10	2	I-RR2_11	0	1	H3	0		0	0	0	28	1	H3	0		0	0	0	60	1	H3	0		0	0	0	240	1	H3	0		1	5	0	273	1	H3	0		0	0	0
124	Reef	2	POC	P. verrucosa	VRR	VRR_3	10	2	I-RR2_12	0	1	H3	0		0	0	0	28	1	H3	0		0	0	0	60	1	H3	0		0	0	0	240	1	H3	0		1	5	0	273	1	H3	0		1	5	0
125	Reef	2	POC	P. verrucosa	VRR	VRR_3	10	2	I-RR2_13	0	1	H3	0		0	0	0	28	1	H3	0		0	0	0	60	1	H3	0		0	0	0	240	1	H3	0		1	5	0	273	1	H3	0		1	5	0
126	Reef	2	POC	P. verrucosa	VRR	VRR_3	10	2	I-RR2_14	0	1	H3	0		0	0	0	28	1	H3	0		0	0	0	60	1	H3	0		0	0	0	240	1	H2	0		1	5	0	273	1	H1	0		0	0	1
127	Reef	2	POC	P. verrucosa	VRR	VRR_3	10	2	I-RR2_15	0	1	H3	0		0	0	0	28	1	H3	0		0	0	0	60	1	H3	0		0	0	0	240	0	D	0					273	0	D	0
128	Reef	2	POC	P. verrucosa	VRR	VRR_3	10	2	I-RR2_16	0	1	H3	0		0	0	0	28	1	H3	0		0	0	0	60	1	H3	0		0	0	0	240	0	D	0					273	0	D	0
129	Reef	3	POC	P. verrucosa	VRR	VRR_2	10	2	I-RR2_17	0	1	H3	0		0	0	0	28	1	H3	0		0	0	0	60	1	H3	0		0	0	0	240	0	D	0					273	0	D	0
130	Reef	3	POC	P. verrucosa	VRR	VRR_2	10	2	I-RR2_18	0	1	H3	0		0	0	0	28	1	H3	0		0	0	0	60	1	H3	0		0	0	0	240	1	H2	0		1	5	0	273	1	H2	0		1	5	0
131	Reef	3	POC	P. verrucosa	VRR	VRR_2	10	2	I-RR2_19	0	1	H3	0		0	0	0	28	1	H3	0		0	0	0	60	1	H3	0		0	0	0	240	1	H3	0		1	5	0	273	1	H3	0		1	5	0
132	Reef	3	POC	P. verrucosa	VRR	VRR_2	10	2	I-RR2_20	0	1	H3	0		0	0	0	28	1	H3	0		0	0	0	60	1	H3	0		0	0	0	240	1	H3	0		1	5	0	273	1	H3	0		1	5	0
133	Reef	3	POC	P. verrucosa	VRR	VRR_2	10	2	I-RR2_21	0	1	H3	0		0	0	0	28	1	H3	0		0	0	0	60	1	H3	0		0	0	0	240	1	H3	0		1	5	0	273	1	H3	0		1	5	0
134	Reef	3	POC	P. verrucosa	VRR	VRR_2	10	2	I-RR2_22	0	1	H3	0		0	0	0	28	1	H3	0		0	0	0	60	1	H3	0		0	0	0	240	1	H3	0		1	5	0	273	1	H3	0		1	5	0
135	Reef	3	POC	P. verrucosa	VRR	VRR_2	10	2	I-RR2_23	0	1	H3	0		0	0	0	28	1	H3	0		0	0	0	60	1	H3	0		0	0	0	240	1	H3	0		1	5	0	273	1	H3	0		1	5	0
136	Reef	3	POC	P. verrucosa	VRR	VRR_2	10	2	I-RR2_24	0	1	H3	0		0	0	0	28	1	H3	0		0	0	0	60	1	H3	0		0	0	0	240	1	H3	0		1	5	0	273	1	H3	0		1	5	0
137	Reef	4	POC	P. verrucosa	VRR	VRR_4	10	2	I-RR2_25	0	1	H3	0		0	0	0	28	1	H3	0		0	0	0	60	1	H3	0		0	0	0	240	1	H3	0		1	5	0	273	1	H3	0		1	5	0
138	Reef	4	POC	P. verrucosa	VRR	VRR_4	10	2	I-RR2_26	0	1	H3	0		0	0	0	28	1	H3	0		0	0	0	60	1	H3	0		0	0	0	240	1	H3	0		1	5	0	273	1	H3	0		1	5	0
139	Reef	4	POC	P. verrucosa	VRR	VRR_4	10	2	I-RR2_27	0	1	H3	0		0	0	0	28	1	H3	0		0	0	0	60	1	H3	0		0	0	0	240	1	H3	0		1	5	0	273	1	H3	0		1	5	0
140	Reef	4	POC	P. verrucosa	VRR	VRR_4	10	2	I-RR2_28	0	1	H3	0		0	0	0	28	1	H3	0		0	0	0	60	1	H3	0		0	0	0	240	1	H3	0		1	5	0	273	1	H3	0		1	5	0
141	Reef	4	POC	P. verrucosa	VRR	VRR_4	10	2	I-RR2_29	0	1	H3	0		0	0	0	28	1	H3	0		0	0	0	60	1	H3	0		0	0	0	240	1	H3	0		1	5	0	273	1	H3	0		1	5	0
142	Reef	4	POC	P. verrucosa	VRR	VRR_4	10	2	I-RR2_30	0	1	H3	0		0	0	0	28	1	H3	0		0	0	0	60	1	H3	0		0	0	0	240	1	H3	0		1	5	0	273	1	H3	0		1	5	0
143	Reef	4	POC	P. verrucosa	VRR	VRR_4	10	2	I-RR2_31	0	1	H3	0		0	0	0	28	1	H3	0		0	0	0	60	1	H3	0		0	0	0	240	1	H3	0		1	5	0	273	1	H3	0		1	5	0
144	Reef	4	POC	P. verrucosa	VRR	VRR_4	10	2	I-RR2_32	0	1	H3	0		0	0	0	28	1	H3	0		0	0	0	60	1	H3	0		0	0	0	240	1	H3	0		1	5	0	273	1	H3	0		1	5	0
145	Reef	5	POC	P. verrucosa	VRR	VRR_5	10	2	I-RR2_33	0	1	H3	0		0	0	0	28	1	H3	0		0	0	0	60	1	H3	0		0	0	0	240	1	H3	0		1	5	0	273	1	H3	0		1	5	0
146	Reef	5	POC	P. verrucosa	VRR	VRR_5	10	2	I-RR2_34	0	1	H3	0		0	0	0	28	1	H3	0		0	0	0	60	1	H3	0		0	0	0	240	1	H3	0		1	5	0	273	1	H3	0		1	5	0
147	Reef	5	POC	P. verrucosa	VRR	VRR_5	10	2	I-RR2_35	0	1	H3	0		0	0	0	28	1	H3	0		0	0	0	60	1	H3	0		0	0	0	240	1	H3	0		1	5	0	273	1	H3	0		1	5	0
148	Reef	5	POC	P. verrucosa	VRR	VRR_5	10	2	I-RR2_36	0	1	H3	0		0	0	0	28	1	H3	0		0	0	0	60	1	H3	0		0	0	0	240	1	H3	0		1	5	0	273	1	H3	0		1	5	0
149	Reef	5	POC	P. verrucosa	VRR	VRR_5	10	2	I-RR2_37	0	1	H3	0		0	0	0	28	1	H3	0		0	0	0	60	1	H3	0		0	0	0	240	1	H3	0		1	5	0	273	1	H3	0		1	5	0
150	Reef	5	POC	P. verrucosa	VRR	VRR_5	10	2	I-RR2_38	0	1	H3	0		0	0	0	28	1	H3	0		0	0	0	60	1	H3	0		0	0	0	240	1	H3	0		1	5	0	273	1	H3	0		1	5	0
151	Reef	5	POC	P. verrucosa	VRR	VRR_5	10	2	I-RR2_39	0	1	H3	0		0	0	0	28	1	H3	0		0	0	0	60	1	H3	0		0	0	0	240	1	H3	0		1	5	0	273	1	H3	0		1	5	0
152	Reef	5	POC	P. verrucosa	VRR	VRR_5	10	2	I-RR2_40	0	1	H3	0		0	0	0	28	1	H3	0		0	0	0	60	1	H3	0		0	0	0	240	1	H3	0		1	5	0	273	1	H3	0		1	5	0
153	Reef	6	POC	P. verrucosa	VRR	VRR_7	10	2	I-RR2_41	0	1	H3	0		0	0	0	28	1	H3	0		0	0	0	60	1	H3	0		0	0	0	240	1	H3	0		1	5	0	273	1	H3	0		1	5	0
154	Reef	6	POC	P. verrucosa	VRR	VRR_7	10	2	I-RR2_42	0	1	H3	0		0	0	0	28	1	H3	0		0	0	0	60	1	H3	0		0	0	0	240	1	H3	0		1	5	0	273	1	H3	0		1	5	0
155	Reef	6	POC	P. verrucosa	VRR	VRR_7	10	2	I-RR2_43	0	1	H3	0		0	0	0	28	1	H3	0		0	0	0	60	1	H3	0		0	0	0	240	1	H3	0		1	5	0	273	1	H3	0		0	0	0
156	Reef	6	POC	P. verrucosa	VRR	VRR_7	10	2	I-RR2_44	0	1	H3	0		0	0	0	28	1	H3	0		0	0	0	60	1	H3	0		0	0	0	240	1	H3	0		1	5	0	273	1	H2	0		0	0	0
157	Reef	6	POC	P. verrucosa	VRR	VRR_7	10	2	I-RR2_45	0	1	H3	0		0	0	0	28	1	H3	0		0	0	0	60	1	H3	0		0	0	0	240	1	H3	0		1	5	0	273	1	H3	0		0	0	0
158	Reef	6	POC	P. verrucosa	VRR	VRR_7	10	2	I-RR2_46	0	1	H3	0		0	0	0	28	1	H3	0		0	0	0	60	1	H3	0		0	0	0	240	1	H3	0		1	5	0	273	1	H3	0		0	0	0
159	Reef	6	POC	P. verrucosa	VRR	VRR_7	10	2	I-RR2_47	0	1	H3	0		0	0	0	28	1	H3	0		0	0	0	60	1	H3	0		0	0	0	240	1	H3	0		1	5	0	273	1	H3	0		1	5	0
160	Reef	6	POC	P. verrucosa	VRR	VRR_7	10	2	I-RR2_48	0	1	H3	0		0	0	0	28	1	H3	0		0	0	0	60	1	H3	0		0	0	0	240	1	H3	0		1	5	0	273	1	H2	0		0	0	1
161	Reef	7	POC	P. verrucosa	VRR	VRR_8	10	2	I-RR2_49	0	1	H3	0		0	0	0	28	1	H3	0		0	0	0	60	1	H3	0		0	0	0	240	1	H3	0		1	5	0	273	1	H3	0		1	5	0
162	Reef	7	POC	P. verrucosa	VRR	VRR_8	10	2	I-RR2_50	0	1	H3	0		0	0	0	28	1	H3	0		0	0	0	60	1	H3	0		0	0	0	240	1	H3	0		1	5	0	273	1	H3	0		1	5	0
163	Reef	7	POC	P. verrucosa	VRR	VRR_8	10	2	I-RR2_51	0	1	H3	0		0	0	0	28	1	H3	0		0	0	0	60	1	H3	0		0	0	0	240	1	H3	0		1	5	0	273	1	H3	0		0	0	0
164	Reef	7	POC	P. verrucosa	VRR	VRR_8	10	2	I-RR2_52	0	1	H3	0		0	0	0	28	1	H3	0		0	0	0	60	1	H3	0		0	0	0	240	1	H3	0		1	5	0	273	1	H3	0		1	5	0
165	Reef	7	POC	P. verrucosa	VRR	VRR_8	10	2	I-RR2_53	0	1	H3	0		0	0	0	28	1	H3	0		0	0	0	60	1	H3	0		0	0	0	240	1	H3	0		1	5	0	273	1	H3	0		1	5	0
166	Reef	7	POC	P. verrucosa	VRR	VRR_8	10	2	I-RR2_54	0	1	H3	0		0	0	0	28	1	H3	0		0	0	0	60	1	H3	0		0	0	0	240	1	H3	0		1	5	0	273	1	H3	0		0	0	0
167	Reef	7	POC	P. verrucosa	VRR	VRR_8	10	2	I-RR2_55	0	1	H3	0		0	0	0	28	1	H3	0		0	0	0	60	1	H3	0		0	0	0	240	1	H3	0		1	5	0	273	1	H3	0		1	5	0
168	Reef	7	POC	P. verrucosa	VRR	VRR_8	10	2	I-RR2_56	0	1	H3	0		0	0	0	28	1	H3	0		0	0	0	60	1	H3	0		0	0	0	240	1	H3	0		1	5	0	273	1	H3	0		1	5	0
169	Reef	8	POC	P. verrucosa	LN	NR7_41	10	2	I-RR2_57	0	1	H3	0		0	0	0	28	1	H3	0		0	0	0	60	1	H3	0		0	0	0	240	1	H3	0		1	5	0	273	1	H3	0		1	5	0
170	Reef	8	POC	P. verrucosa	LN	NR7_41	10	2	I-RR2_58	0	1	H3	0		0	0	0	28	1	H3	0		0	0	0	60	1	H3	0		0	0	0	240	1	H3	0		1	5	0	273	1	H3	1	HC	1	5	0
171	Reef	8	POC	P. verrucosa	LN	NR7_41	10	2	I-RR2_59	0	1	H3	0		0	0	0	28	1	H3	0		0	0	0	60	1	H3	0		0	0	0	240	1	H3	0		1	5	0	273	1	H3	0		1	5	0
172	Reef	8	POC	P. verrucosa	LN	NR7_41	10	2	I-RR2_60	0	1	H3	0		0	0	0	28	1	H3	0		0	0	0	60	1	H3	0		0	0	0	240	1	H3	0		1	5	0	273	1	H3	1	HC	0	0	0
173	Reef	8	POC	P. verrucosa	LN	NR7_41	10	2	I-RR2_61	0	1	H3	0		0	0	0	28	1	H3	0		0	0	0	60	1	H3	0		0	0	0	240	1	H3	0		1	5	0	273	1	H3	0		1	5	0
174	Reef	8	POC	P. verrucosa	LN	NR7_41	10	2	I-RR2_62	0	1	H3	0		0	0	0	28	1	H3	0		0	0	0	60	1	H3	0		0	0	0	240	1	H3	0		1	5	0	273	1	H3	0		1	5	0
175	Reef	8	POC	P. verrucosa	LN	NR7_41	10	2	I-RR2_63	0	1	H3	0		0	0	0	28	1	H3	0		0	0	0	60	1	H3	0		0	0	0	240	1	H3	0		1	5	0	273	1	H3	0		1	5	0
176	Reef	8	POC	P. verrucosa	LN	NR7_41	10	2	I-RR2_64	0	1	H3	0		0	0	0	28	1	H3	0		0	0	0	60	1	H3	0		0	0	0	240	1	H3	0		1	5	0	273	1	H3	0		0	0	0
177	Reef	9	POC	P. verrucosa	LN	NR7_19	10	2	I-RR2_65	0	1	H3	0		0	0	0	28	1	H3	0		0	0	0	60	1	H3	0		0	0	0	240	1	H3	0		1	5	0	273	1	H3	0		0	0	0
178	Reef	9	POC	P. verrucosa	LN	NR7_19	10	2	I-RR2_66	0	1	H3	0		0	0	0	28	1	H3	0		0	0	0	60	1	H3	0		0	0	0	240	1	H3	0		1	5	0	273	1	H3	0		0	0	0
179	Reef	9	POC	P. verrucosa	LN	NR7_19	10	2	I-RR2_67	0	1	H3	0		0	0	0	28	1	H3	0		0	0	0	60	1	H3	0		0	0	0	240	1	H3	0		1	5	0	273	1	H3	0		0	0	0
180	Reef	9	POC	P. verrucosa	LN	NR7_19	10	2	I-RR2_68	0	1	H3	0		0	0	0	28	1	H3	0		0	0	0	60	1	H3	0		0	0	0	240	1	H3	0		1	5	0	273	1	H3	0		0	0	0
181	Reef	9	POC	P. verrucosa	LN	NR7_19	10	2	I-RR2_69	0	1	H3	0		0	0	0	28	1	H3	0		0	0	0	60	1	H3	0		0	0	0	240	1	H3	0		1	5	0	273	1	H3	0		0	0	0
182	Reef	9	POC	P. verrucosa	LN	NR7_19	10	2	I-RR2_70	0	1	H3	0		0	0	0	28	1	H3	0		0	0	0	60	1	H3	0		0	0	0	240	1	H3	0		1	5	0	273	1	H3	0		0	0	0
183	Reef	9	POC	P. verrucosa	LN	NR7_19	10	2	I-RR2_71	0	1	H3	0		0	0	0	28	1	H3	0		0	0	0	60	1	H3	0		0	0	0	240	1	H3	0		1	5	0	273	1	H3	0		0	0	0
184	Reef	9	POC	P. verrucosa	LN	NR7_19	10	2	I-RR2_72	0	1	H3	0		0	0	0	28	1	H3	0		0	0	0	60	1	H3	0		0	0	0	240	1	H3	0		1	5	0	273	1	H3	0		0	0	0
185	Reef	10	POC	P. verrucosa	LN	NR7_19	10	2	I-RR2_73	0	1	H3	0		0	0	0	28	1	H3	0		0	0	0	60	1	H3	0		0	0	0	240	1	H3	0		1	5	0	273	1	H3	0		1	5	0
186	Reef	10	POC	P. verrucosa	LN	NR8_46	10	2	I-RR2_74	0	1	H3	0		0	0	0	28	1	H3	0		0	0	0	60	1	H3	0		0	0	0	240	1	H3	0		1	5	0	273	1	H3	1	C	1	5	0
187	Reef	10	POC	P. verrucosa	LN	NR8_46	10	2	I-RR2_75	0	1	H3	0		0	0	0	28	1	H3	0		0	0	0	60	1	H3	0		0	0	0	240	1	H3	0		1	5	0	273	1	H3	0		1	5	0
188	Reef	10	POC	P. verrucosa	LN	NR8_46	10	2	I-RR2_76	0	1	H3	0		0	0	0	28	1	H3	0		0	0	0	60	1	H3	0		0	0	0	240	1	H3	0		1	5	0	273	1	H3	0		1	5	0
189	Reef	10	POC	P. verrucosa	LN	NR8_46	10	2	I-RR2_77	0	1	H3	0		0	0	0	28	1	H3	0		0	0	0	60	1	H3	0		0	0	0	240	1	H3	0		1	5	0	273	1	H3	0		0	0	0
190	Reef	10	POC	P. verrucosa	LN	NR8_46	10	2	I-RR2_78	0	1	H3	0		0	0	0	28	1	H3	0		0	0	0	60	1	H3	0		0	0	0	240	1	H3	0		1	5	0	273	1	H3	0		0	0	0
191	Reef	10	POC	P. verrucosa	LN	NR8_46	10	2	I-RR2_79	0	1	H3	0		0	0	0	28	1	H3	0		0	0	0	60	1	H3	0		0	0	0	240	1	H3	0		1	5	0	273	1	H3	1	HC	0	0	0
192	Reef	10	POC	P. verrucosa	LN	NR8_46	10	2	I-RR2_80	0	1	H3	0		0	0	0	28	1	H3	0		0	0	0	60	1	H3	0		0	0	0	240	1	H3	1	HC	1	5	0	273	1	H3	0		0	0	0
193	Reef	11	POC	P. verrucosa	LN	NR7_30	10	2	I-RR2_81	0	1	H3	0		0	0	0	28	1	H3	0		0	0	0	60	1	H3	0		0	0	0	240	1	H3	1	C	1	5	0	273	1	H3	0		0	0	0
194	Reef	11	POC	P. verrucosa	LN	NR7_30	10	2	I-RR2_82	0	1	H3	0		0	0	0	28	1	H3	0		0	0	0	60	1	H3	0		0	0	0	240	1	H3	0		1	5	0	273	1	H3	0		0	0	0
195	Reef	11	POC	P. verrucosa	LN	NR7_30	10	2	I-RR2_83	0	1	H3	0		0	0	0	28	1	H3	0		0	0	0	60	1	H3	0		0	0	0	240	1	H3	0		1	5	0	273	1	H3	0		0	0	0
196	Reef	11	POC	P. verrucosa	LN	NR7_30	10	2	I-RR2_84	0	1	H3	0		0	0	0	28	1	H3	0		0	0	0	60	1	H3	0		0	0	0	240	1	H3	0		1	5	0	273	1	H3	0		0	0	0
197	Reef	11	POC	P. verrucosa	LN	NR7_30	10	2	I-RR2_85	0	1	H3	0		0	0	0	28	1	H3	0		0	0	0	60	1	H3	0		0	0	0	240	1	H3	1	C	1	5	0	273	1	H3	1	C	0	0	0
198	Reef	11	POC	P. verrucosa	LN	NR7_30	10	2	I-RR2_86	0	1	H3	0		0	0	0	28	1	H3	0		0	0	0	60	1	H3	0		0	0	0	240	1	H3	0		1	5	0	273	1	H3	0		0	0	0
199	Reef	11	POC	P. verrucosa	LN	NR7_30	10	2	I-RR2_87	0	1	H3	0		0	0	0	28	1	H3	0		0	0	0	60	1	H3	0		0	0	0	240	1	H3	0		1	5	0	273	1	H3	0		0	0	0
200	Reef	11	POC	P. verrucosa	LN	NR7_30	10	2	I-RR2_88	0	1	H3	0		0	0	0	28	1	H3	0		0	0	0	60	1	H3	0		0	0	0	240	1	H3	0		1	5	0	273	1	H3	0		0	0	0
201	Reef	12	POC	P. verrucosa	LN	NR7_47	10	2	I-RR2_89	0	1	H3	0		0	0	0	28	1	H3	0		0	0	0	60	1	H3	0		0	0	0	240	1	H3	0		1	5	0	273	1	H3	0		0	0	0
202	Reef	12	POC	P. verrucosa	LN	NR7_47	10	2	I-RR2_90	0	1	H3	0		0	0	0	28	1	H3	0		0	0	0	60	1	H3	0		0	0	0	240	1	H3	0		1	5	0	273	1	H3	0		0	0	0
203	Reef	12	POC	P. verrucosa	LN	NR7_47	10	2	I-RR2_91	0	1	H3	0		0	0	0	28	1	H3	0		0	0	0	60	1	H3	0		0	0	0	240	1	H3	0		1	5	0	273	1	H3	0		0	0	0
204	Reef	12	POC	P. verrucosa	LN	NR7_47	10	2	I-RR2_92	0	1	H3	0		0	0	0	28	1	H3	0		0	0	0	60	1	H3	0		0	0	0	240	1	H3	0		1	5	0	273	1	H3	0		0	0	0
205	Reef	12	POC	P. verrucosa	LN	NR7_47	10	2	I-RR2_93	0	1	H3	0		0	0	0	28	1	H3	0		0	0	0	60	1	H3	0		0	0	0	240	1	H3	0		1	5	0	273	1	H3	0		1	5	0
206	Reef	12	POC	P. verrucosa	LN	NR7_47	10	2	I-RR2_94	0	1	H3	0		0	0	0	28	1	H3	0		0	0	0	60	1	H3	0		0	0	0	240	1	H3	0		1	5	0	273	1	H3	0		0	0	0
207	Reef	12	POC	P. verrucosa	LN	NR7_47	10	2	I-RR2_95	0	1	H3	0		0	0	0	28	1	H3	0		0	0	0	60	1	H3	0		0	0	0	240	1	H3	0		1	5	0	273	1	H3	0		0	0	0
208	Reef	12	POC	P. verrucosa	LN	NR7_47	10	2	I-RR2_96	0	1	H3	0		0	0	0	28	1	H3	0		0	0	0	60	1	H3	0		0	0	0	240	1	H3	0		1	5	0	273	1	H3	0		0	0	0
209	Reef	13	POC	P. verrucosa	LN	NR8_15	10	2	I-RR2_97	0	1	H3	0		0	0	0	28	1	H3	0		0	0	0	60	1	H3	0		0	0	0	240	1	H3	0		1	5	0	273	1	H3	0		1	5	0
210	Reef	13	POC	P. verrucosa	LN	NR8_15	10	2	I-RR2_98	0	1	H3	0		0	0	0	28	1	H3	0		0	0	0	60	1	H3	0		0	0	0	240	1	H3	0		1	5	0	273	1	H3	0		1	5	0
211	Reef	13	POC	P. verrucosa	LN	NR8_15	10	2	I-RR2_99	0	1	H3	0		0	0	0	28	1	H3	0		0	0	0	60	1	H3	0		0	0	0	240	1	H3	0		1	5	0	273	1	H3	0		1	5	0
212	Reef	13	POC	P. verrucosa	LN	NR8_15	10	2	I-RR2_100	0	1	H3	0		0	0	0	28	1	H3	0		0	0	0	60	1	H3	0		0	0	0	240	1	H3	0		1	5	0	273	1	H3	0		1	5	0
213	Reef	13	POC	P. verrucosa	LN	NR8_15	10	2	I-RR2_101	0	1	H3	0		0	0	0	28	1	H3	0		0	0	0	60	1	H3	0		0	0	0	240	1	H3	0		1	5	0	273	1	H3	0		1	5	0
214	Reef	13	POC	P. verrucosa	LN	NR8_15	10	2	I-RR2_102	0	1	H3	0		0	0	0	28	1	H3	0		0	0	0	60	1	H3	0		0	0	0	240	1	H3	0		1	5	0	273	1	H3	0		1	5	0
215	Reef	13	POC	P. verrucosa	LN	NR8_15	10	2	I-RR2_103	0	1	H3	0		0	0	0	28	1	H3	0		0	0	0	60	1	H3	0		0	0	0	240	1	H3	0		1	5	0	273	1	H3	0		1	5	0
216	Reef	13	POC	P. verrucosa	LN	NR8_15	10	2	I-RR2_104	0	1	H3	0		0	0	0	28	1	H3	0		0	0	0	60	1	H3	0		0	0	0	240	1	H3	0		1	5	0	273	1	H3	0		1	5	0
217	Reef	14	POC	P. verrucosa	LN	NR7_25	10	2	I-RR2_105	0	1	H3	0		0	0	0	28	1	H3	0		0	0	0	60	1	H3	0		0	0	0	240	0	D	0					273	0	D	0
218	Reef	14	POC	P. verrucosa	LN	NR7_25	10	2	I-RR2_106	0	1	H3	0		0	0	0	28	1	H3	0		0	0	0	60	1	H3	0		0	0	0	240	0	D	0					273	0	D	0
219	Reef	14	POC	P. verrucosa	LN	NR7_25	10	2	I-RR2_107	0	1	H3	0		0	0	0	28	1	H3	0		0	0	0	60	1	H3	0		0	0	0	240	0	D	0					273	0	D	0
220	Reef	14	POC	P. verrucosa	LN	NR7_25	10	2	I-RR2_108	0	1	H3	0		0	0	0	28	1	H3	0		0	0	0	60	1	H3	0		0	0	0	240	1	H3	1	C	1	5	0	273	1	H3	1	C	0	0	0
221	Reef	14	POC	P. verrucosa	LN	NR7_25	10	2	I-RR2_109	0	1	H3	0		0	0	0	28	1	H3	0		0	0	0	60	1	H3	0		0	0	0	240	1	H3	0		1	5	0	273	1	H3	0		0	0	0
222	Reef	14	POC	P. verrucosa	LN	NR7_25	10	2	I-RR2_110	0	1	H3	0		0	0	0	28	1	H3	0		0	0	0	60	1	H3	0		0	0	0	240	1	H3	0		1	5	0	273	1	H3	0		0	0	0
223	Reef	14	POC	P. verrucosa	LN	NR7_25	10	2	I-RR2_111	0	1	H3	0		0	0	0	28	1	H3	0		0	0	0	60	1	H3	0		0	0	0	240	1	H3	0		1	5	0	273	1	H3	0		0	0	0
224	Reef	14	POC	P. verrucosa	LN	NR7_25	10	2	I-RR2_112	0	1	H3	0		0	0	0	28	1	H3	0		0	0	0	60	1	H3	0		0	0	0	240	1	H3	0		1	5	0	273	1	H3	0		1	5	0
225	Reef	1	POC	P. verrucosa	VRR	VRR_1	15	3	I-RR3_1	0	1	H3	0		0	0	0	28	1	H3	0		0	0	0	60	1	H3	0		0	0	0	240	1	H3	0		1	5	0	273	1	H3	0		1	5	0
226	Reef	1	POC	P. verrucosa	VRR	VRR_1	15	3	I-RR3_2	0	1	H3	0		0	0	0	28	1	H3	0		0	0	0	60	1	H3	0		0	0	0	240	1	H3	0		1	5	0	273	1	H3	0		1	5	0
227	Reef	1	POC	P. verrucosa	VRR	VRR_1	15	3	I-RR3_3	0	1	H3	0		0	0	0	28	1	H3	0		0	0	0	60	1	H3	0		0	0	0	240	1	H3	0		1	5	0	273	1	H3	0		1	5	0
228	Reef	1	POC	P. verrucosa	VRR	VRR_1	15	3	I-RR3_4	0	1	H3	0		0	0	0	28	1	H3	0		0	0	0	60	1	H3	0		0	0	0	240	1	H3	0		1	5	0	273	1	H3	0		1	5	0
229	Reef	1	POC	P. verrucosa	VRR	VRR_1	15	3	I-RR3_5	0	1	H3	0		0	0	0	28	1	H3	0		0	0	0	60	1	H3	0		0	0	0	240	1	H3	0		1	5	0	273	1	H3	0		1	5	0
230	Reef	1	POC	P. verrucosa	VRR	VRR_1	15	3	I-RR3_6	0	1	H3	0		0	0	0	28	1	H3	0		0	0	0	60	1	H3	0		0	0	0	240	1	H3	0		1	5	0	273	1	H3	0		1	5	0
231	Reef	1	POC	P. verrucosa	VRR	VRR_1	15	3	I-RR3_7	0	1	H3	0		0	0	0	28	1	H3	0		0	0	0	60	1	H3	0		0	0	0	240	1	H3	0		1	5	0	273	1	H3	0		1	5	0
232	Reef	1	POC	P. verrucosa	VRR	VRR_1	15	3	I-RR3_8	0	1	H3	0		0	0	0	28	1	H3	0		0	0	0	60	1	H3	0		0	0	0	240	1	H3	0		1	5	0	273	1	H3	0		1	5	0
233	Reef	2	POC	P. verrucosa	VRR	VRR_3	15	3	I-RR3_9	0	1	H3	0		0	0	0	28	1	H3	0		0	0	0	60	1	H3	0		0	0	0	240	1	H3	0		1	5	0	273	1	H3	0		1	5	0
234	Reef	2	POC	P. verrucosa	VRR	VRR_3	15	3	I-RR3_10	0	1	H3	0		0	0	0	28	1	H3	0		0	0	0	60	1	H3	0		0	0	0	240	1	H3	0		1	5	0	273	1	H3	0		1	5	0
235	Reef	2	POC	P. verrucosa	VRR	VRR_3	15	3	I-RR3_11	0	1	H3	0		0	0	0	28	1	H3	0		0	0	0	60	1	H3	0		0	0	0	240	1	H3	0		1	5	0	273	1	H3	0		1	5	0
236	Reef	2	POC	P. verrucosa	VRR	VRR_3	15	3	I-RR3_12	0	1	H3	0		0	0	0	28	1	H3	0		0	0	0	60	1	H3	0		0	0	0	240	1	H3	0		1	5	0	273	1	H3	0		1	5	0
237	Reef	2	POC	P. verrucosa	VRR	VRR_3	15	3	I-RR3_13	0	1	H3	0		0	0	0	28	1	H3	0		0	0	0	60	1	H3	0		0	0	0	240	1	H3	0		1	5	0	273	1	H3	0		1	5	0
238	Reef	2	POC	P. verrucosa	VRR	VRR_3	15	3	I-RR3_14	0	1	H3	0		0	0	0	28	1	H3	0		0	0	0	60	1	H3	0		0	0	0	240	1	H3	0		1	5	0	273	1	H3	0		1	5	0
239	Reef	2	POC	P. verrucosa	VRR	VRR_3	15	3	I-RR3_15	0	1	H3	0		0	0	0	28	1	H3	0		0	0	0	60	1	H3	0		0	0	0	240	1	H3	0		1	5	0	273	1	H3	0		1	5	0
240	Reef	2	POC	P. verrucosa	VRR	VRR_3	15	3	I-RR3_16	0	1	H3	0		0	0	0	28	1	H3	0		0	0	0	60	1	H3	0		0	0	0	240	1	H3	0		1	5	0	273	1	H3	0		1	5	0
241	Reef	3	POC	P. verrucosa	VRR	VRR_2	15	3	I-RR3_17	0	1	H3	0		0	0	0	28	1	H3	0		0	0	0	60	1	H3	0		0	0	0	240	1	H3	0		1	5	0	273	1	H3	0		1	5	0
242	Reef	3	POC	P. verrucosa	VRR	VRR_2	15	3	I-RR3_18	0	1	H3	0		0	0	0	28	1	H3	0		0	0	0	60	1	H3	0		0	0	0	240	1	H3	0		1	5	0	273	1	H3	0		1	5	0
243	Reef	3	POC	P. verrucosa	VRR	VRR_2	15	3	I-RR3_19	0	1	H3	0		0	0	0	28	1	H3	0		0	0	0	60	1	H3	0		0	0	0	240	1	H3	0		1	5	0	273	1	H3	0		1	5	0
244	Reef	3	POC	P. verrucosa	VRR	VRR_2	15	3	I-RR3_20	0	1	H3	0		0	0	0	28	1	H3	0		0	0	0	60	1	H3	0		0	0	0	240	1	H3	0		1	5	0	273	1	H3	0		1	5	0
245	Reef	3	POC	P. verrucosa	VRR	VRR_2	15	3	I-RR3_21	0	1	H3	0		0	0	0	28	1	H3	0		0	0	0	60	1	H3	0		0	0	0	240	1	H3	0		1	5	0	273	1	H3	0		1	5	0
246	Reef	3	POC	P. verrucosa	VRR	VRR_2	15	3	I-RR3_22	0	1	H3	0		0	0	0	28	1	H3	0		0	0	0	60	1	H3	0		0	0	0	240	1	H3	0		1	5	0	273	1	H3	0		1	5	0
247	Reef	3	POC	P. verrucosa	VRR	VRR_2	15	3	I-RR3_23	0	1	H3	0		0	0	0	28	1	H3	0		0	0	0	60	1	H3	0		0	0	0	240	1	H3	0		1	5	0	273	1	H3	0		1	5	0
248	Reef	3	POC	P. verrucosa	VRR	VRR_2	15	3	I-RR3_24	0	1	H3	0		0	0	0	28	1	H3	0		0	0	0	60	1	H3	0		0	0	0	240	1	H3	0		1	5	0	273	1	H3	0		1	5	0
249	Reef	4	POC	P. verrucosa	VRR	VRR_4	15	3	I-RR3_25	0	1	H3	0		0	0	0	28	1	H3	0		0	0	0	60	1	H3	0		0	0	0	240	1	H3	0		1	5	0	273	1	H3	0		1	5	0
250	Reef	4	POC	P. verrucosa	VRR	VRR_4	15	3	I-RR3_26	0	1	H3	0		0	0	0	28	1	H3	0		0	0	0	60	1	H3	0		0	0	0	240	1	H3	0		1	5	0	273	1	H3	0		1	5	0
251	Reef	4	POC	P. verrucosa	VRR	VRR_4	15	3	I-RR3_27	0	1	H3	0		0	0	0	28	1	H3	0		0	0	0	60	1	H3	0		0	0	0	240	1	H3	0		1	5	0	273	1	H3	0		1	5	0
252	Reef	4	POC	P. verrucosa	VRR	VRR_4	15	3	I-RR3_28	0	1	H3	0		0	0	0	28	1	H3	0		0	0	0	60	1	H3	0		0	0	0	240	1	H3	0		1	5	0	273	1	H3	0		1	5	0
253	Reef	4	POC	P. verrucosa	VRR	VRR_4	15	3	I-RR3_29	0	1	H3	0		0	0	0	28	1	H3	0		0	0	0	60	1	H3	0		0	0	0	240	1	H3	0		1	5	0	273	1	H3	0		1	5	0
254	Reef	4	POC	P. verrucosa	VRR	VRR_4	15	3	I-RR3_30	0	1	H3	0		0	0	0	28	1	H3	0		0	0	0	60	1	H3	0		0	0	0	240	1	H3	0		1	5	0	273	1	H3	0		1	5	0
255	Reef	4	POC	P. verrucosa	VRR	VRR_4	15	3	I-RR3_31	0	1	H3	0		0	0	0	28	1	H3	0		0	0	0	60	1	H3	0		0	0	0	240	1	H3	0		1	5	0	273	1	H3	0		1	5	0
256	Reef	4	POC	P. verrucosa	VRR	VRR_4	15	3	I-RR3_32	0	1	H3	0		0	0	0	28	1	H3	0		0	0	0	60	1	H3	0		0	0	0	240	1	H3	0		1	5	0	273	1	H3	0		1	5	0
257	Reef	5	POC	P. verrucosa	VRR	VRR_5	15	3	I-RR3_33	0	1	H3	0		0	0	0	28	1	H3	0		0	0	0	60	1	H3	0		0	0	0	240	1	H3	0		1	5	0	273	1	H3	0		1	5	0
258	Reef	5	POC	P. verrucosa	VRR	VRR_5	15	3	I-RR3_34	0	1	H3	0		0	0	0	28	1	H3	0		0	0	0	60	1	H3	0		0	0	0	240	1	H3	0		1	5	0	273	1	H3	0		1	5	0
259	Reef	5	POC	P. verrucosa	VRR	VRR_5	15	3	I-RR3_35	0	1	H3	0		0	0	0	28	1	H3	0		0	0	0	60	1	H3	0		0	0	0	240	1	H3	0		1	5	0	273	1	H3	0		1	5	0
260	Reef	5	POC	P. verrucosa	VRR	VRR_5	15	3	I-RR3_36	0	1	H3	0		0	0	0	28	1	H3	0		0	0	0	60	1	H3	0		0	0	0	240	1	H3	0		1	5	0	273	1	H3	0		1	5	0
261	Reef	5	POC	P. verrucosa	VRR	VRR_5	15	3	I-RR3_37	0	1	H3	0		0	0	0	28	1	H3	0		0	0	0	60	1	H3	0		0	0	0	240	1	H3	0		1	5	0	273	1	H3	0		1	5	0
262	Reef	5	POC	P. verrucosa	VRR	VRR_5	15	3	I-RR3_38	0	1	H3	0		0	0	0	28	1	H3	0		0	0	0	60	1	H3	0		0	0	0	240	1	H3	0		1	5	0	273	1	H3	0		1	5	0
263	Reef	5	POC	P. verrucosa	VRR	VRR_5	15	3	I-RR3_39	0	1	H3	0		0	0	0	28	1	H3	0		0	0	0	60	1	H3	0		0	0	0	240	1	H3	0		1	5	0	273	1	H3	0		1	5	0
264	Reef	5	POC	P. verrucosa	VRR	VRR_5	15	3	I-RR3_40	0	1	H3	0		0	0	0	28	1	H3	0		0	0	0	60	1	H3	0		0	0	0	240	1	H3	0		1	5	0	273	1	H3	0		1	5	0
265	Reef	6	POC	P. verrucosa	VRR	VRR_7	15	3	I-RR3_41	0	1	H3	0		0	0	0	28	1	H3	0		0	0	0	60	1	H3	0		0	0	0	240	1	H3	0		0	0	0	273	1	H3	0		1	5	0
266	Reef	6	POC	P. verrucosa	VRR	VRR_7	15	3	I-RR3_42	0	1	H3	0		0	0	0	28	1	H3	0		0	0	0	60	1	H3	0		0	0	0	240	1	H3	0		0	0	0	273	1	H3	0		1	5	0
267	Reef	6	POC	P. verrucosa	VRR	VRR_7	15	3	I-RR3_43	0	1	H3	0		0	0	0	28	1	H3	0		0	0	0	60	1	H3	0		0	0	0	240	1	H3	0		0	0	0	273	1	H3	0		1	5	0
268	Reef	6	POC	P. verrucosa	VRR	VRR_7	15	3	I-RR3_44	0	1	H3	0		0	0	0	28	1	H3	0		0	0	0	60	1	H3	0		0	0	0	240	1	H3	0		0	0	0	273	1	H3	0		1	5	0
269	Reef	6	POC	P. verrucosa	VRR	VRR_7	15	3	I-RR3_45	0	1	H3	0		0	0	0	28	1	H3	0		0	0	0	60	1	H3	0		0	0	0	240	1	H3	0		0	0	0	273	1	H3	0		0	0	0
270	Reef	6	POC	P. verrucosa	VRR	VRR_7	15	3	I-RR3_46	0	1	H3	0		0	0	0	28	1	H3	0		0	0	0	60	1	H3	0		0	0	0	240	1	H3	0		0	0	0	273	1	H3	0		1	5	0
271	Reef	6	POC	P. verrucosa	VRR	VRR_7	15	3	I-RR3_47	0	1	H3	0		0	0	0	28	1	H3	0		0	0	0	60	1	H3	0		0	0	0	240	1	H3	0		0	0	0	273	1	H3	0		0	0	0
272	Reef	6	POC	P. verrucosa	VRR	VRR_7	15	3	I-RR3_48	0	1	H3	0		0	0	0	28	1	H3	0		0	0	0	60	1	H3	0		0	0	0	240	1	H3	0		0	0	0	273	1	H3	0		0	0	0
273	Reef	7	POC	P. verrucosa	VRR	VRR_8	15	3	I-RR3_49	0	1	H3	0		0	0	0	28	1	H3	0		0	0	0	60	1	H3	0		0	0	0	240	1	H3	0		1	5	0	273	1	H3	0		0	0	0
274	Reef	7	POC	P. verrucosa	VRR	VRR_8	15	3	I-RR3_50	0	1	H3	0		0	0	0	28	1	H3	0		0	0	0	60	1	H3	0		0	0	0	240	1	H3	0		1	5	0	273	1	H3	0		1	5	0
275	Reef	7	POC	P. verrucosa	VRR	VRR_8	15	3	I-RR3_51	0	1	H3	0		0	0	0	28	1	H3	0		0	0	0	60	1	H3	0		0	0	0	240	1	H3	0		1	5	0	273	1	H3	0		1	5	0
276	Reef	7	POC	P. verrucosa	VRR	VRR_8	15	3	I-RR3_52	0	1	H3	0		0	0	0	28	1	H3	0		0	0	0	60	1	H3	0		0	0	0	240	1	H3	0		1	5	0	273	1	H3	0		1	5	0
277	Reef	7	POC	P. verrucosa	VRR	VRR_8	15	3	I-RR3_53	0	1	H3	0		0	0	0	28	1	H3	0		0	0	0	60	1	H3	0		0	0	0	240	1	H3	0		0	0	0	273	1	H3	0		1	5	0
278	Reef	7	POC	P. verrucosa	VRR	VRR_8	15	3	I-RR3_54	0	1	H3	0		0	0	0	28	1	H3	0		0	0	0	60	1	H3	0		0	0	0	240	1	H3	0		0	0	0	273	1	H3	0		1	5	0
279	Reef	7	POC	P. verrucosa	VRR	VRR_8	15	3	I-RR3_55	0	1	H3	0		0	0	0	28	1	H3	0		0	0	0	60	1	H3	0		0	0	0	240	1	H3	0		0	0	0	273	1	H3	0		1	5	0
280	Reef	7	POC	P. verrucosa	VRR	VRR_8	15	3	I-RR3_56	0	1	H3	0		0	0	0	28	1	H3	0		0	0	0	60	1	H3	0		0	0	0	240	1	H3	0		0	0	0	273	1	H3	0		1	5	0
281	Reef	8	POC	P. verrucosa	LN	NR7_41	15	3	I-RR3_57	0	1	H3	0		0	0	0	28	1	H3	0		0	0	0	60	1	H3	0		0	0	0	240	1	H3	0		0	0	0	273	1	H3	0		0	0	0
282	Reef	8	POC	P. verrucosa	LN	NR7_41	15	3	I-RR3_58	0	1	H3	0		0	0	0	28	1	H3	0		0	0	0	60	1	H3	0		0	0	0	240	1	H3	0		0	0	0	273	1	H3	0		0	0	0
283	Reef	8	POC	P. verrucosa	LN	NR7_41	15	3	I-RR3_59	0	1	H3	0		0	0	0	28	1	H3	0		0	0	0	60	1	H3	0		0	0	0	240	1	H3	0		0	0	0	273	1	H3	0		1	5	0
284	Reef	8	POC	P. verrucosa	LN	NR7_41	15	3	I-RR3_60	0	1	H3	0		0	0	0	28	1	H3	0		0	0	0	60	1	H3	0		0	0	0	240	1	H3	0		0	0	0	273	1	H3	0		1	5	0
285	Reef	8	POC	P. verrucosa	LN	NR7_41	15	3	I-RR3_61	0	1	H3	0		0	0	0	28	1	H3	0		0	0	0	60	1	H3	0		0	0	0	240	1	H3	0		1	5	0	273	1	H3	0		1	5	0
286	Reef	8	POC	P. verrucosa	LN	NR7_41	15	3	I-RR3_62	0	1	H3	0		0	0	0	28	1	H3	0		0	0	0	60	1	H3	0		0	0	0	240	1	H3	0		1	5	0	273	1	H3	0		0	0	0
287	Reef	8	POC	P. verrucosa	LN	NR7_41	15	3	I-RR3_63	0	1	H3	0		0	0	0	28	1	H3	0		0	0	0	60	1	H3	0		0	0	0	240	1	H3	0		1	5	0	273	1	H3	0		1	5	0
288	Reef	8	POC	P. verrucosa	LN	NR7_41	15	3	I-RR3_64	0	1	H3	0		0	0	0	28	1	H3	0		0	0	0	60	1	H3	0		0	0	0	240	1	H3	0		1	5	0	273	1	H3	0		1	5	0
289	Reef	9	POC	P. verrucosa	LN	NR7_19	15	3	I-RR3_65	0	1	H3	0		0	0	0	28	1	H3	0		0	0	0	60	1	H3	0		0	0	0	240	1	H3	0		0	0	0	273	1	H3	0		0	0	0
290	Reef	9	POC	P. verrucosa	LN	NR7_19	15	3	I-RR3_66	0	1	H3	0		0	0	0	28	1	H3	0		0	0	0	60	1	H3	0		0	0	0	240	1	H3	0		0	0	0	273	1	H3	0		0	0	0
291	Reef	9	POC	P. verrucosa	LN	NR7_19	15	3	I-RR3_67	0	1	H3	0		0	0	0	28	1	H3	0		0	0	0	60	1	H3	0		0	0	0	240	1	H3	1	C	0	0	0	273	1	H3	1	C	0	0	0
292	Reef	9	POC	P. verrucosa	LN	NR7_19	15	3	I-RR3_68	0	1	H3	0		0	0	0	28	1	H3	0		0	0	0	60	1	H3	0		0	0	0	240	1	H3	0		0	0	0	273	1	H3	0		0	0	0
293	Reef	9	POC	P. verrucosa	LN	NR7_19	15	3	I-RR3_69	0	1	H3	0		0	0	0	28	1	H3	0		0	0	0	60	1	H3	0		0	0	0	240	1	H3	0		0	0	0	273	1	H3	0		0	0	0
294	Reef	9	POC	P. verrucosa	LN	NR7_19	15	3	I-RR3_70	0	1	H3	0		0	0	0	28	1	H3	0		0	0	0	60	1	H3	0		0	0	0	240	1	H3	1	C	0	0	0	273	1	H3	1	C	0	0	0
295	Reef	9	POC	P. verrucosa	LN	NR7_19	15	3	I-RR3_71	0	1	H3	0		0	0	0	28	1	H3	0		0	0	0	60	1	H3	0		0	0	0	240	1	H1	0		0	0	0	273	0	D	0
296	Reef	9	POC	P. verrucosa	LN	NR7_19	15	3	I-RR3_72	0	1	H3	0		0	0	0	28	1	H3	0		0	0	0	60	1	H3	0		0	0	0	240	1	H3	0		0	0	0	273	1	H3	1	C	0	0	0
297	Reef	10	POC	P. verrucosa	LN	NR7_19	15	3	I-RR3_73	0	1	H3	0		0	0	0	28	1	H3	0		0	0	0	60	1	H3	0		0	0	0	240	1	H3	0		0	0	0	273	1	H3	0		1	5	0
298	Reef	10	POC	P. verrucosa	LN	NR8_46	15	3	I-RR3_74	0	1	H3	0		0	0	0	28	1	H3	0		0	0	0	60	1	H3	0		0	0	0	240	1	H3	0		0	0	0	273	1	H3	0		0	0	0
299	Reef	10	POC	P. verrucosa	LN	NR8_46	15	3	I-RR3_75	0	1	H3	0		0	0	0	28	1	H3	0		0	0	0	60	1	H3	0		0	0	0	240	1	H3	0		0	0	0	273	1	H3	0		0	0	0
300	Reef	10	POC	P. verrucosa	LN	NR8_46	15	3	I-RR3_76	0	1	H3	0		0	0	0	28	1	H3	0		0	0	0	60	1	H3	0		0	0	0	240	1	H3	0		0	0	0	273	1	H3	0		0	0	0
301	Reef	10	POC	P. verrucosa	LN	NR8_46	15	3	I-RR3_77	0	1	H3	0		0	0	0	28	1	H3	0		0	0	0	60	1	H3	0		0	0	0	240	1	H3	0		0	0	0	273	1	H3	0		1	5	0
302	Reef	10	POC	P. verrucosa	LN	NR8_46	15	3	I-RR3_78	0	1	H3	0		0	0	0	28	1	H3	0		0	0	0	60	1	H3	0		0	0	0	240	1	H3	0		0	0	0	273	1	H3	0		0	0	0
303	Reef	10	POC	P. verrucosa	LN	NR8_46	15	3	I-RR3_79	0	1	H3	0		0	0	0	28	1	H3	0		0	0	0	60	1	H3	0		0	0	0	240	1	H3	0		0	0	0	273	1	H3	0		0	0	0
304	Reef	10	POC	P. verrucosa	LN	NR8_46	15	3	I-RR3_80	0	1	H3	0		0	0	0	28	1	H3	0		0	0	0	60	1	H3	0		0	0	0	240	1	H3	0		0	0	0	273	1	H3	0		0	0	0
305	Reef	11	POC	P. verrucosa	LN	NR7_30	15	3	I-RR3_81	0	1	H3	0		0	0	0	28	1	H3	0		0	0	0	60	1	H3	0		0	0	0	240	1	H3	1	C	0	0	0	273	1	H3	1	C	1	5	0
306	Reef	11	POC	P. verrucosa	LN	NR7_30	15	3	I-RR3_82	0	1	H3	0		0	0	0	28	1	H3	0		0	0	0	60	1	H3	0		0	0	0	240	1	H3	0		0	0	0	273	1	H3	0		0	0	0
307	Reef	11	POC	P. verrucosa	LN	NR7_30	15	3	I-RR3_83	0	1	H3	0		0	0	0	28	1	H3	0		0	0	0	60	1	H3	0		0	0	0	240	1	H3	0		0	0	0	273	1	H3	0		0	0	0
308	Reef	11	POC	P. verrucosa	LN	NR7_30	15	3	I-RR3_84	0	1	H3	0		0	0	0	28	1	H3	0		0	0	0	60	1	H3	0		0	0	0	240	1	H3	0		0	0	0	273	1	H3	1	C	0	0	0
309	Reef	11	POC	P. verrucosa	LN	NR7_30	15	3	I-RR3_85	0	1	H3	0		0	0	0	28	1	H3	0		0	0	0	60	1	H3	0		0	0	0	240	1	H3	0		0	0	0	273	1	H3	0		0	0	0
310	Reef	11	POC	P. verrucosa	LN	NR7_30	15	3	I-RR3_86	0	1	H3	0		0	0	0	28	1	H3	0		0	0	0	60	1	H3	0		0	0	0	240	1	H3	0		0	0	0	273	1	H3	0		0	0	0
311	Reef	11	POC	P. verrucosa	LN	NR7_30	15	3	I-RR3_87	0	1	H3	0		0	0	0	28	1	H3	0		0	0	0	60	1	H3	0		0	0	0	240	1	H3	0		0	0	0	273	1	H3	1	C	0	0	0
312	Reef	11	POC	P. verrucosa	LN	NR7_30	15	3	I-RR3_88	0	1	H3	0		0	0	0	28	1	H3	0		0	0	0	60	1	H3	0		0	0	0	240	1	H3	0		0	0	0	273	1	H3	0		0	0	0
313	Reef	12	POC	P. verrucosa	LN	NR7_47	15	3	I-RR3_89	0	1	H3	0		0	0	0	28	1	H3	0		0	0	0	60	1	H3	0		0	0	0	240	1	H3	0		0	0	0	273	1	H3	0		1	5	0
314	Reef	12	POC	P. verrucosa	LN	NR7_47	15	3	I-RR3_90	0	1	H3	0		0	0	0	28	1	H3	0		0	0	0	60	1	H3	0		0	0	0	240	1	H3	0		0	0	0	273	1	H3	0		0	0	0
315	Reef	12	POC	P. verrucosa	LN	NR7_47	15	3	I-RR3_91	0	1	H3	0		0	0	0	28	1	H3	0		0	0	0	60	1	H3	0		0	0	0	240	1	H3	0		0	0	0	273	1	H3	0		0	0	0
316	Reef	12	POC	P. verrucosa	LN	NR7_47	15	3	I-RR3_92	0	1	H3	0		0	0	0	28	1	H3	0		0	0	0	60	1	H3	0		0	0	0	240	1	H3	0		0	0	0	273	1	H3	0		0	0	0
317	Reef	12	POC	P. verrucosa	LN	NR7_47	15	3	I-RR3_93	0	1	H3	0		0	0	0	28	1	H3	0		0	0	0	60	1	H3	0		0	0	0	240	1	H3	0		0	0	0	273	1	H3	0		0	0	0
318	Reef	12	POC	P. verrucosa	LN	NR7_47	15	3	I-RR3_94	0	1	H3	0		0	0	0	28	1	H3	0		0	0	0	60	1	H3	0		0	0	0	240	1	H3	0		0	0	0	273	1	H3	0		1	5	0
319	Reef	12	POC	P. verrucosa	LN	NR7_47	15	3	I-RR3_95	0	1	H3	0		0	0	0	28	1	H3	0		0	0	0	60	1	H3	0		0	0	0	240	1	H3	0		0	0	0	273	1	H3	0		1	5	0
320	Reef	12	POC	P. verrucosa	LN	NR7_47	15	3	I-RR3_96	0	1	H3	0		0	0	0	28	1	H3	0		0	0	0	60	1	H3	0		0	0	0	240	1	H3	0		0	0	0	273	1	H3	0		1	5	0
321	Reef	13	POC	P. verrucosa	LN	NR8_15	15	3	I-RR3_97	0	1	H3	0		0	0	0	28	1	H3	0		0	0	0	60	1	H3	0		0	0	0	240	1	H3	0		0	0	0	273	1	H3	0		0	0	0
322	Reef	13	POC	P. verrucosa	LN	NR8_15	15	3	I-RR3_98	0	1	H3	0		0	0	0	28	1	H3	0		0	0	0	60	1	H3	0		0	0	0	240	1	H3	0		0	0	0	273	1	H3	0		0	0	0
323	Reef	13	POC	P. verrucosa	LN	NR8_15	15	3	I-RR3_99	0	1	H3	0		0	0	0	28	1	H3	0		0	0	0	60	1	H3	0		0	0	0	240	1	H3	0		0	0	0	273	1	H3	0		1	5	0
324	Reef	13	POC	P. verrucosa	LN	NR8_15	15	3	I-RR3_100	0	1	H3	0		0	0	0	28	1	H3	0		0	0	0	60	1	H3	0		0	0	0	240	1	H3	0		0	0	0	273	1	H3	0		0	0	0
325	Reef	13	POC	P. verrucosa	LN	NR8_15	15	3	I-RR3_101	0	1	H3	0		0	0	0	28	1	H3	0		0	0	0	60	1	H3	0		0	0	0	240	1	H3	0		0	0	0	273	1	H3	0		1	5	0
326	Reef	13	POC	P. verrucosa	LN	NR8_15	15	3	I-RR3_102	0	1	H3	0		0	0	0	28	1	H3	0		0	0	0	60	1	H3	0		0	0	0	240	1	H3	0		0	0	0	273	1	H3	0		1	5	0
327	Reef	13	POC	P. verrucosa	LN	NR8_15	15	3	I-RR3_103	0	1	H3	0		0	0	0	28	1	H3	0		0	0	0	60	1	H3	0		0	0	0	240	1	H3	0		0	0	0	273	1	H3	0		1	5	0
328	Reef	13	POC	P. verrucosa	LN	NR8_15	15	3	I-RR3_104	0	1	H3	0		0	0	0	28	1	H3	0		0	0	0	60	1	H3	0		0	0	0	240	1	H3	0		0	0	0	273	1	H3	0		1	5	0
329	Reef	14	POC	P. verrucosa	LN	NR7_25	15	3	I-RR3_105	0	1	H3	0		0	0	0	28	1	H3	0		0	0	0	60	1	H3	0		0	0	0	240	1	H3	1	C	0	0	0	273	1	H3	1	C	1	5	0
330	Reef	14	POC	P. verrucosa	LN	NR7_25	15	3	I-RR3_106	0	1	H3	0		0	0	0	28	1	H3	0		0	0	0	60	1	H3	0		0	0	0	240	1	H3	0		0	0	0	273	1	H3	0		1	5	0
331	Reef	14	POC	P. verrucosa	LN	NR7_25	15	3	I-RR3_107	0	1	H3	0		0	0	0	28	1	H3	0		0	0	0	60	1	H3	0		0	0	0	240	1	H3	0		0	0	0	273	1	H3	0		1	5	0
332	Reef	14	POC	P. verrucosa	LN	NR7_25	15	3	I-RR3_108	0	1	H3	0		0	0	0	28	1	H3	0		0	0	0	60	1	H3	0		0	0	0	240	1	H3	0		0	0	0	273	1	H3	0		1	5	0
333	Reef	14	POC	P. verrucosa	LN	NR7_25	15	3	I-RR3_109	0	1	H3	0		0	0	0	28	1	H3	0		0	0	0	60	1	H3	0		0	0	0	240	1	H3	0		0	0	0	273	1	H3	0		1	5	0
334	Reef	14	POC	P. verrucosa	LN	NR7_25	15	3	I-RR3_110	0	1	H3	0		0	0	0	28	1	H3	0		0	0	0	60	1	H3	0		0	0	0	240	1	H3	0		0	0	0	273	1	H3	0		1	5	0
335	Reef	14	POC	P. verrucosa	LN	NR7_25	15	3	I-RR3_111	0	1	H3	0		0	0	0	28	1	H3	0		0	0	0	60	1	H3	0		0	0	0	240	1	H3	0		0	0	0	273	1	H3	0		1	5	0
336	Reef	14	POC	P. verrucosa	LN	NR7_25	15	3	I-RR3_112	0	1	H3	0		0	0	0	28	1	H3	0		0	0	0	60	1	H3	0		0	0	0	240	1	H3	0		0	0	0	273	1	H3	1	C	1	5	0
337	Lagoon	1	POC	P. verrucosa	VRR	VRR_1	5	0	LR1_1	0	1	H3	0		0	0	0	28	1	H3	0		0	0	0	60	1	H3	0		0	0	0	240	1	H3	0		1	5	0	273	1	H3	0		0	0	0
338	Lagoon	1	POC	P. verrucosa	VRR	VRR_1	5	0	LR1_2	0	1	H3	0		0	0	0	28	1	H3	0		0	0	0	60	1	H3	0		0	0	0	240	1	H3	0		1	5	0	273	1	H3	0		0	0	0
339	Lagoon	1	POC	P. verrucosa	VRR	VRR_1	5	0	LR1_3	0	1	H3	0		0	0	0	28	1	H3	0		0	0	0	60	1	H3	0		0	0	0	240	1	H3	0		1	5	0	273	1	H3	0		0	0	0
340	Lagoon	1	POC	P. verrucosa	VRR	VRR_1	5	0	LR1_4	0	1	H3	0		0	0	0	28	1	H3	0		0	0	0	60	1	H3	0		0	0	0	240	1	H2	0		1	5	0	273	1	H2	0		0	0	0
341	Lagoon	1	POC	P. verrucosa	VRR	VRR_1	5	0	LR1_5	0	1	H3	0		0	0	0	28	1	H3	0		0	0	0	60	1	H3	0		0	0	0	240	1	H3	0		1	5	0	273	1	H3	0		0	0	0
342	Lagoon	1	POC	P. verrucosa	VRR	VRR_1	5	0	LR1_6	0	1	H3	0		0	0	0	28	1	H3	0		0	0	0	60	1	H3	0		0	0	0	240	1	H3	0		1	5	0	273	1	H3	0		0	0	0
343	Lagoon	1	POC	P. verrucosa	VRR	VRR_1	5	0	LR1_7	0	1	H3	0		0	0	0	28	1	H3	0		0	0	0	60	1	H3	0		0	0	0	240	1	H3	0		1	5	0	273	1	H3	0		0	0	0
344	Lagoon	1	POC	P. verrucosa	VRR	VRR_1	5	0	LR1_8	0	1	H3	0		0	0	0	28	1	H3	0		0	0	0	60	1	H3	0		0	0	0	240	1	H3	0		1	5	0	273	1	H3	0		0	0	0
345	Lagoon	2	POC	P. verrucosa	VRR	VRR_3	5	0	LR1_9	0	1	H3	0		0	0	0	28	1	H3	0		0	0	0	60	1	H3	0		0	0	0	240	1	H3	0		1	5	0	273	1	H3	0		0	0	0
346	Lagoon	2	POC	P. verrucosa	VRR	VRR_3	5	0	LR1_10	0	1	H3	0		0	0	0	28	1	H3	0		0	0	0	60	1	H3	0		0	0	0	240	1	H3	0		1	5	0	273	1	H3	1	C	0	0	0
347	Lagoon	2	POC	P. verrucosa	VRR	VRR_3	5	0	LR1_11	0	1	H3	0		0	0	0	28	1	H3	0		0	0	0	60	1	H3	0		0	0	0	240	1	H3	0		1	5	0	273	1	H3	0		0	0	0
348	Lagoon	2	POC	P. verrucosa	VRR	VRR_3	5	0	LR1_12	0	1	H3	0		0	0	0	28	1	H3	0		0	0	0	60	1	H3	0		0	0	0	240	1	H3	0		1	5	0	273	1	H3	1	C	0	0	0
349	Lagoon	2	POC	P. verrucosa	VRR	VRR_3	5	0	LR1_13	0	1	H3	0		0	0	0	28	1	H3	0		0	0	0	60	1	H3	0		0	0	0	240	1	H3	1	C	1	5	0	273	1	H3	1	C	0	0	0
350	Lagoon	2	POC	P. verrucosa	VRR	VRR_3	5	0	LR1_14	0	1	H3	0		0	0	0	28	1	H3	0		0	0	0	60	1	H3	0		0	0	0	240	1	H3	1	C	1	5	0	273	1	H3	1	C	0	0	0
351	Lagoon	2	POC	P. verrucosa	VRR	VRR_3	5	0	LR1_15	0	1	H3	0		0	0	0	28	1	H3	0		0	0	0	60	1	H3	0		0	0	0	240	1	H3	1	F	1	5	0	273	1	H3	0		0	0	0
352	Lagoon	2	POC	P. verrucosa	VRR	VRR_3	5	0	LR1_16	0	1	H3	0		0	0	0	28	1	H3	0		0	0	0	60	1	H3	0		0	0	0	240	1	H3	1	C,C	1	5	0	273	1	H3	1	C,C	0	0	0
353	Lagoon	3	POC	P. verrucosa	VRR	VRR_2	5	0	LR1_17	0	1	H3	0		0	0	0	28	1	H3	0		0	0	0	60	1	H3	0		0	0	0	240	1	H2	0		1	5	0	273	1	H2	0		0	0	0
354	Lagoon	3	POC	P. verrucosa	VRR	VRR_2	5	0	LR1_18	0	1	H3	0		0	0	0	28	1	H3	0		0	0	0	60	1	H3	0		0	0	0	240	1	H3	0		1	5	0	273	1	H3	0		0	0	0
355	Lagoon	3	POC	P. verrucosa	VRR	VRR_2	5	0	LR1_19	0	1	H3	0		0	0	0	28	1	H3	0		0	0	0	60	1	H3	0		0	0	0	240	1	H3	0		1	5	0	273	1	H3	1	C,C	0	0	0
356	Lagoon	3	POC	P. verrucosa	VRR	VRR_2	5	0	LR1_20	0	1	H3	0		0	0	0	28	1	H3	0		0	0	0	60	1	H3	0		0	0	0	240	1	H3	0		1	5	0	273	1	H3	0		0	0	0
357	Lagoon	3	POC	P. verrucosa	VRR	VRR_2	5	0	LR1_21	0	1	H3	0		0	0	0	28	1	H3	0		0	0	0	60	1	H3	0		0	0	0	240	1	H3	0		1	5	0	273	1	H3	0		0	0	0
358	Lagoon	3	POC	P. verrucosa	VRR	VRR_2	5	0	LR1_22	0	1	H3	0		0	0	0	28	1	H3	0		0	0	0	60	1	H3	0		0	0	0	240	1	H3	0		1	5	0	273	1	H3	0		0	0	0
359	Lagoon	3	POC	P. verrucosa	VRR	VRR_2	5	0	LR1_23	0	1	H3	0		0	0	0	28	1	H3	0		0	0	0	60	1	H3	0		0	0	0	240	1	H3	0		1	5	0	273	1	H3	0		0	0	0
360	Lagoon	3	POC	P. verrucosa	VRR	VRR_2	5	0	LR1_24	0	1	H3	0		0	0	0	28	1	H3	0		0	0	0	60	1	H3	0		0	0	0	240	1	H3	1	C	1	5	0	273	1	H3	0		0	0	0
361	Lagoon	4	POC	P. verrucosa	VRR	VRR_4	5	0	LR1_25	0	1	H3	0		0	0	0	28	1	H3	0		0	0	0	60	1	H3	0		0	0	0	240	1	H3	0		1	5	0	273	1	H3	0		0	0	0
362	Lagoon	4	POC	P. verrucosa	VRR	VRR_4	5	0	LR1_26	0	1	H3	0		0	0	0	28	1	H3	0		0	0	0	60	1	H3	0		0	0	0	240	1	H3	0		1	5	0	273	1	H3	0		0	0	0
363	Lagoon	4	POC	P. verrucosa	VRR	VRR_4	5	0	LR1_27	0	1	H3	0		0	0	0	28	1	H3	0		0	0	0	60	1	H3	0		0	0	0	240	1	H3	0		1	5	0	273	1	H3	0		0	0	0
364	Lagoon	4	POC	P. verrucosa	VRR	VRR_4	5	0	LR1_28	0	1	H3	0		0	0	0	28	1	H3	0		0	0	0	60	1	H3	0		0	0	0	240	1	H3	0		1	5	0	273	1	H3	0		0	0	0
365	Lagoon	4	POC	P. verrucosa	VRR	VRR_4	5	0	LR1_29	0	1	H3	0		0	0	0	28	1	H3	0		0	0	0	60	1	H3	0		0	0	0	240	1	H3	0		1	5	0	273	1	H3	0		0	0	0
366	Lagoon	4	POC	P. verrucosa	VRR	VRR_4	5	0	LR1_30	0	1	H3	0		0	0	0	28	1	H3	0		0	0	0	60	1	H3	0		0	0	0	240	1	H3	1	C	1	5	0	273	1	H3	0		0	0	0
367	Lagoon	4	POC	P. verrucosa	VRR	VRR_4	5	0	LR1_31	0	1	H3	0		0	0	0	28	1	H3	0		0	0	0	60	1	H3	0		0	0	0	240	1	H3	0		1	5	0	273	1	H3	0		0	0	0
368	Lagoon	4	POC	P. verrucosa	VRR	VRR_4	5	0	LR1_32	0	1	H3	0		0	0	0	28	1	H3	0		0	0	0	60	1	H3	0		0	0	0	240	1	H3	0		1	5	0	273	1	H3	0		0	0	0
369	Lagoon	5	POC	P. verrucosa	VRR	VRR_5	5	0	LR1_33	0	1	H3	0		0	0	0	28	1	H3	0		0	0	0	60	1	H3	0		0	0	0	240	1	H3	1	C, C	1	5	0	273	1	H3	0		0	0	0
370	Lagoon	5	POC	P. verrucosa	VRR	VRR_5	5	0	LR1_34	0	1	H3	0		0	0	0	28	1	H3	0		0	0	0	60	1	H3	0		0	0	0	240	1	H3	0		1	5	0	273	1	H3	1	C	0	0	0
371	Lagoon	5	POC	P. verrucosa	VRR	VRR_5	5	0	LR1_35	0	1	H3	0		0	0	0	28	1	H3	0		0	0	0	60	1	H3	0		0	0	0	240	1	H3	1	C	1	5	0	273	1	H3	1	C	0	0	0
372	Lagoon	5	POC	P. verrucosa	VRR	VRR_5	5	0	LR1_36	0	1	H3	0		0	0	0	28	0	D	0					60	0	D	0					240	0	D	0			5		273	0	D	0
373	Lagoon	5	POC	P. verrucosa	VRR	VRR_5	5	0	LR1_37	0	1	H3	0		0	0	0	28	1	H3	0		0	0	0	60	1	H3	0		0	0	0	240	1	H3	1	C	1	5	0	273	1	H3	1	C	0	0	0
374	Lagoon	5	POC	P. verrucosa	VRR	VRR_5	5	0	LR1_38	0	1	H3	0		0	0	0	28	1	H3	0		0	0	0	60	1	H3	0		0	0	0	240	1	H2	0		1	5	0	273	1	H2	0		0	0	0
375	Lagoon	5	POC	P. verrucosa	VRR	VRR_5	5	0	LR1_39	0	1	H3	0		0	0	0	28	1	H3	0		0	0	0	60	1	H3	0		0	0	0	240	1	H3	1	C	1	5	0	273	1	H3	1	C	0	0	0
376	Lagoon	5	POC	P. verrucosa	VRR	VRR_5	5	0	LR1_40	0	1	H3	0		0	0	0	28	1	H3	0		0	0	0	60	1	H3	0		0	0	0	240	1	H3	1	C	1	5	0	273	1	H3	0		0	0	0
377	Lagoon	6	POC	P. verrucosa	VRR	VRR_7	5	0	LR1_41	0	1	H3	0		0	0	0	28	1	H3	0		0	0	0	60	1	H3	0		0	0	0	240	1	H3	0		1	5	0	273	1	H3	0		0	0	0
378	Lagoon	6	POC	P. verrucosa	VRR	VRR_7	5	0	LR1_42	0	1	H3	0		0	0	0	28	1	H3	0		0	0	0	60	1	H3	0		0	0	0	240	1	H3	0		1	5	0	273	1	H3	0		0	0	0
379	Lagoon	6	POC	P. verrucosa	VRR	VRR_7	5	0	LR1_43	0	1	H3	0		0	0	0	28	1	H3	0		0	0	0	60	1	H3	0		0	0	0	240	1	H3	0		1	5	0	273	1	H3	0		0	0	0
380	Lagoon	6	POC	P. verrucosa	VRR	VRR_7	5	0	LR1_44	0	1	H3	0		0	0	0	28	1	H3	0		0	0	0	60	1	H3	0		0	0	0	240	1	H3	1	C	1	5	0	273	1	H3	1	C	0	0	0
381	Lagoon	6	POC	P. verrucosa	VRR	VRR_7	5	0	LR1_45	0	1	H3	0		0	0	0	28	1	H3	0		0	0	0	60	1	H3	0		0	0	0	240	1	H3	0		1	5	0	273	1	H3	0		0	0	0
382	Lagoon	6	POC	P. verrucosa	VRR	VRR_7	5	0	LR1_46	0	1	H3	0		0	0	0	28	1	H3	0		0	0	0	60	1	H3	0		0	0	0	240	1	H3	0		1	5	0	273	1	H3	0		0	0	0
383	Lagoon	6	POC	P. verrucosa	VRR	VRR_7	5	0	LR1_47	0	1	H3	0		0	0	0	28	1	H3	0		0	0	0	60	1	H3	0		0	0	0	240	1	H3	1	C, C	1	5	0	273	1	H3	1	C,C	0	0	0
384	Lagoon	6	POC	P. verrucosa	VRR	VRR_7	5	0	LR1_48	0	1	H3	0		0	0	0	28	1	H3	0		0	0	0	60	1	H3	0		0	0	0	240	1	H3	1	C	1	5	0	273	1	H3	0		0	0	0
385	Lagoon	7	POC	P. verrucosa	VRR	VRR_8	5	0	LR1_49	0	1	H3	0		0	0	0	28	1	H3	0		0	0	0	60	1	H3	0		0	0	0	240	1	H3	0		1	5	0	273	1	H3	0		0	0	0
386	Lagoon	7	POC	P. verrucosa	VRR	VRR_8	5	0	LR1_50	0	1	H3	0		0	0	0	28	1	H3	0		0	0	0	60	1	H3	0		0	0	0	240	1	H3	0		1	5	0	273	1	H3	1	C	0	0	0
387	Lagoon	7	POC	P. verrucosa	VRR	VRR_8	5	0	LR1_51	0	1	H3	0		0	0	0	28	1	H3	0		0	0	0	60	1	H3	0		0	0	0	240	1	H3	0		1	5	0	273	1	H3	0		0	0	0
388	Lagoon	7	POC	P. verrucosa	VRR	VRR_8	5	0	LR1_52	0	1	H3	0		0	0	0	28	1	H3	0		0	0	0	60	1	H3	0		0	0	0	240	1	H3	0		1	5	0	273	1	H3	0		0	0	0
389	Lagoon	7	POC	P. verrucosa	VRR	VRR_8	5	0	LR1_53	0	1	H3	0		0	0	0	28	1	H3	0		0	0	0	60	1	H3	0		0	0	0	240	1	H3	0		1	5	0	273	1	H3	0		0	0	0
390	Lagoon	7	POC	P. verrucosa	VRR	VRR_8	5	0	LR1_54	0	1	H3	0		0	0	0	28	1	H3	0		0	0	0	60	1	H3	0		0	0	0	240	1	H3	1	C	1	5	0	273	1	H3	1	C	0	0	0
391	Lagoon	7	POC	P. verrucosa	VRR	VRR_8	5	0	LR1_55	0	1	H3	0		0	0	0	28	1	H3	0		0	0	0	60	1	H3	0		0	0	0	240	1	H3	1	C	1	5	0	273	1	H3	1	C	0	0	0
392	Lagoon	7	POC	P. verrucosa	VRR	VRR_8	5	0	LR1_56	0	1	H3	0		0	0	0	28	1	H3	0		0	0	0	60	1	H3	0		0	0	0	240	1	H3	0		1	5	0	273	1	H3	0		0	0	0
393	Lagoon	8	POC	P. verrucosa	LN	NR7_41	5	0	LR2_1	0	1	H3	0		0	0	0	28	1	H3	0		0	0	0	60	1	H3	0		0	0	0	240	1	H3	1	C,F	1	5	0	273	1	H3	1	C,C	0	0	0
394	Lagoon	8	POC	P. verrucosa	LN	NR7_41	5	0	LR2_2	0	1	H3	0		0	0	0	28	1	H3	0		0	0	0	60	1	H3	0		0	0	0	240	1	H3	0		1	5	0	273	1	H3	0		0	0	0
395	Lagoon	8	POC	P. verrucosa	LN	NR7_41	5	0	LR2_3	0	1	H3	0		0	0	0	28	1	H3	0		0	0	0	60	1	H3	0		0	0	0	240	1	H3	1	C, C	1	5	0	273	1	H3	1	C	0	0	0
396	Lagoon	8	POC	P. verrucosa	LN	NR7_41	5	0	LR2_4	0	1	H3	0		0	0	0	28	1	H3	0		0	0	0	60	1	H3	0		0	0	0	240	1	H3	0		1	5	0	273	1	H3	0		0	0	0
397	Lagoon	8	POC	P. verrucosa	LN	NR7_41	5	0	LR2_5	0	1	H3	0		0	0	0	28	1	H3	0		0	0	0	60	1	H3	0		0	0	0	240	1	H3	0		1	5	0	273	1	H3	1	C	0	0	0
398	Lagoon	8	POC	P. verrucosa	LN	NR7_41	5	0	LR2_6	0	1	H3	0		0	0	0	28	1	H3	0		0	0	0	60	1	H3	0		0	0	0	240	1	H3	0		1	5	0	273	1	H3	1	C	0	0	0
399	Lagoon	8	POC	P. verrucosa	LN	NR7_41	5	0	LR2_7	0	1	H3	0		0	0	0	28	1	H3	0		0	0	0	60	1	H3	0		0	0	0	240	1	H3	0		1	5	0	273	1	H3	0		0	0	0
400	Lagoon	8	POC	P. verrucosa	LN	NR7_41	5	0	LR2_8	0	1	H3	0		0	0	0	28	1	H3	0		0	0	0	60	1	H3	0		0	0	0	240	1	H3	0		1	5	0	273	1	H3	0		0	0	0
401	Lagoon	9	POC	P. verrucosa	LN	NR7_19	5	0	LR2_9	0	1	H3	0		0	0	0	28	1	H3	0		0	0	0	60	1	H3	0		0	0	0	240	1	H3	0		1	5	0	273	1	H3	1	C	0	0	0
402	Lagoon	9	POC	P. verrucosa	LN	NR7_19	5	0	LR2_10	0	1	H3	0		0	0	0	28	1	H3	0		0	0	0	60	1	H3	0		0	0	0	240	1	H3	0		1	5	0	273	1	H3	1	C	0	0	0
403	Lagoon	9	POC	P. verrucosa	LN	NR7_19	5	0	LR2_11	0	1	H3	0		0	0	0	28	1	H3	0		0	0	0	60	1	H3	0		0	0	0	240	1	H3	0		1	5	0	273	1	H3	1	C,C	0	0	0
404	Lagoon	9	POC	P. verrucosa	LN	NR7_19	5	0	LR2_12	0	1	H3	0		0	0	0	28	1	H3	0		0	0	0	60	1	H3	0		0	0	0	240	1	H3	1	C C	1	5	0	273	1	H3	1	C	0	0	0
405	Lagoon	9	POC	P. verrucosa	LN	NR7_19	5	0	LR2_13	0	1	H3	0		0	0	0	28	1	H3	0		0	0	0	60	1	H3	0		0	0	0	240	1	H3	1	C	1	5	0	273	1	H3	0		0	0	0
406	Lagoon	9	POC	P. verrucosa	LN	NR7_19	5	0	LR2_14	0	1	H3	0		0	0	0	28	1	H3	0		0	0	0	60	1	H3	0		0	0	0	240	1	H3	0		1	5	0	273	1	H3	1	C	0	0	0
407	Lagoon	9	POC	P. verrucosa	LN	NR7_19	5	0	LR2_15	0	1	H3	0		0	0	0	28	1	H3	0		0	0	0	60	1	H3	0		0	0	0	240	1	H3	1	C	1	5	0	273	1	H3	1	C	0	0	0
408	Lagoon	9	POC	P. verrucosa	LN	NR7_19	5	0	LR2_16	0	1	H3	0		0	0	0	28	1	H3	0		0	0	0	60	1	H3	0		0	0	0	240	1	H3	1	CC	1	5	0	273	1	H3	1	C	0	0	0
409	Lagoon	10	POC	P. verrucosa	LN	NR7_19	5	0	LR2_17	0	1	H3	0		0	0	0	28	1	H3	0		0	0	0	60	1	H3	0		0	0	0	240	1	H3	0		1	5	0	273	1	H3	0		0	0	0
410	Lagoon	10	POC	P. verrucosa	LN	NR8_46	5	0	LR2_18	0	1	H3	0		0	0	0	28	1	H3	0		0	0	0	60	1	H3	0		0	0	0	240	1	H3	0		1	5	0	273	1	H3	0		0	0	0
411	Lagoon	10	POC	P. verrucosa	LN	NR8_46	5	0	LR2_19	0	1	H3	0		0	0	0	28	1	H3	0		0	0	0	60	1	H3	0		0	0	0	240	1	H3	0		1	5	0	273	1	H3	0		0	0	0
412	Lagoon	10	POC	P. verrucosa	LN	NR8_46	5	0	LR2_20	0	1	H3	0		0	0	0	28	1	H3	0		0	0	0	60	1	H3	0		0	0	0	240	1	H3	1	C	1	5	0	273	1	H3	1	F	0	0	0
413	Lagoon	10	POC	P. verrucosa	LN	NR8_46	5	0	LR2_21	0	1	H3	0		0	0	0	28	1	H3	0		0	0	0	60	1	H3	0		0	0	0	240	1	H3	0		1	5	0	273	1	H3	1	C	0	0	0
414	Lagoon	10	POC	P. verrucosa	LN	NR8_46	5	0	LR2_22	0	1	H3	0		0	0	0	28	1	H3	0		0	0	0	60	1	H3	0		0	0	0	240	1	H3	1	C C	1	5	0	273	1	H3	1	C	0	0	0
415	Lagoon	10	POC	P. verrucosa	LN	NR8_46	5	0	LR2_23	0	1	H3	0		0	0	0	28	1	H3	0		0	0	0	60	1	H3	0		0	0	0	240	1	H3	1	C	1	5	0	273	1	H3	0		0	0	0
416	Lagoon	10	POC	P. verrucosa	LN	NR8_46	5	0	LR2_24	0	1	H3	0		0	0	0	28	1	H3	0		0	0	0	60	1	H3	0		0	0	0	240	1	H3	0		1	5	0	273	1	H3	0		0	0	0
417	Lagoon	11	POC	P. verrucosa	LN	NR7_30	5	0	LR2_25	0	1	H3	0		0	0	0	28	1	H3	0		0	0	0	60	1	H3	0		0	0	0	240	1	H3	1	C	1	5	0	273	1	H3	0		0	0	0
418	Lagoon	11	POC	P. verrucosa	LN	NR7_30	5	0	LR2_26	0	1	H3	0		0	0	0	28	1	H3	0		0	0	0	60	1	H3	0		0	0	0	240	1	H3	1	C	1	5	0	273	1	H3	1	C,C	0	0	0
419	Lagoon	11	POC	P. verrucosa	LN	NR7_30	5	0	LR2_27	0	1	H3	0		0	0	0	28	1	H3	0		0	0	0	60	1	H3	0		0	0	0	240	1	H3	0		1	5	0	273	1	H3	0		0	0	0
420	Lagoon	11	POC	P. verrucosa	LN	NR7_30	5	0	LR2_28	0	1	H3	0		0	0	0	28	1	H3	0		0	0	0	60	1	H3	0		0	0	0	240	1	H3	0		1	5	0	273	1	H3	1	C	0	0	0
421	Lagoon	11	POC	P. verrucosa	LN	NR7_30	5	0	LR2_29	0	1	H3	0		0	0	0	28	1	H3	0		0	0	0	60	1	H3	0		0	0	0	240	1	H3	1	C	1	5	0	273	1	H3	0		0	0	0
422	Lagoon	11	POC	P. verrucosa	LN	NR7_30	5	0	LR2_30	0	1	H3	0		0	0	0	28	1	H3	0		0	0	0	60	1	H2	0		0	0	0	240	1	H3	1	C	1	5	0	273	1	H3	1	C	0	0	0
423	Lagoon	11	POC	P. verrucosa	LN	NR7_30	5	0	LR2_31	0	1	H3	0		0	0	0	28	1	H3	0		0	0	0	60	1	H3	0		0	0	0	240	1	H3	1	C C	1	5	0	273	1	H3	1	C,C	0	0	0
424	Lagoon	11	POC	P. verrucosa	LN	NR7_30	5	0	LR2_32	0	1	H3	0		0	0	0	28	1	H3	0		0	0	0	60	1	H3	0		0	0	0	240	1	H3	0		1	5	0	273	1	H3	0		0	0	0
425	Lagoon	12	POC	P. verrucosa	LN	NR7_47	5	0	LR2_33	0	1	H3	0		0	0	0	28	1	B	0		0	0	0	60	1	H3	0		0	0	0	240	1	H3	1	C	1	5	0	273	1	H3	1	C	0	0	0
426	Lagoon	12	POC	P. verrucosa	LN	NR7_47	5	0	LR2_34	0	1	H3	0		0	0	0	28	1	H3	0		0	0	0	60	1	H3	0		0	0	0	240	1	H3	0		1	5	0	273	1	H3	0		0	0	0
427	Lagoon	12	POC	P. verrucosa	LN	NR7_47	5	0	LR2_35	0	1	H3	0		0	0	0	28	1	H3	0		0	0	0	60	1	H3	0		0	0	0	240	1	H3	1	C	1	5	0	273	1	H3	0		0	0	0
428	Lagoon	12	POC	P. verrucosa	LN	NR7_47	5	0	LR2_36	0	1	H3	0		0	0	0	28	1	H3	0		0	0	0	60	1	H3	0		0	0	0	240	1	H3	0		1	5	0	273	1	H3	0		0	0	0
429	Lagoon	12	POC	P. verrucosa	LN	NR7_47	5	0	LR2_37	0	1	H3	0		0	0	0	28	1	H3	0		0	0	0	60	1	H3	0		0	0	0	240	1	H3	0		1	5	0	273	1	H3	1	C	0	0	0
430	Lagoon	12	POC	P. verrucosa	LN	NR7_47	5	0	LR2_38	0	1	H3	0		0	0	0	28	1	H3	0		0	0	0	60	1	H3	0		0	0	0	240	1	H3	1	C C	1	5	0	273	1	H3	1	C	0	0	0
431	Lagoon	12	POC	P. verrucosa	LN	NR7_47	5	0	LR2_39	0	1	H3	0		0	0	0	28	1	H3	0		0	0	0	60	1	H3	0		0	0	0	240	1	H3	1	C	1	5	0	273	1	H3	0		0	0	0
432	Lagoon	12	POC	P. verrucosa	LN	NR7_47	5	0	LR2_40	0	1	H3	0		0	0	0	28	1	H3	0		0	0	0	60	1	H3	0		0	5	0	240	1	H3	1	C	1	5	0	273	1	H3	1	C	0	0	0
433	Lagoon	13	POC	P. verrucosa	LN	NR8_15	5	0	LR2_41	0	1	H3	0		0	0	0	28	1	H3	0		0	0	0	60	1	H3	0		0	0	0	240	1	H3	0		1	5	0	273	1	H3	1	C	0	0	0
434	Lagoon	13	POC	P. verrucosa	LN	NR8_15	5	0	LR2_42	0	1	H3	0		0	0	0	28	1	H3	0		0	0	0	60	1	H3	0		0	0	0	240	1	H3	0		1	5	0	273	1	H3	0		0	0	0
435	Lagoon	13	POC	P. verrucosa	LN	NR8_15	5	0	LR2_43	0	1	H3	0		0	0	0	28	1	H3	0		0	0	0	60	1	H3	0		0	0	0	240	1	H3	1	C	1	5	0	273	1	H3	1	C	0	0	0
436	Lagoon	13	POC	P. verrucosa	LN	NR8_15	5	0	LR2_44	0	1	H3	0		0	0	0	28	1	H3	0		0	0	0	60	1	H3	0		0	0	0	240	1	H3	0		1	5	0	273	1	H3	0		0	0	0
437	Lagoon	13	POC	P. verrucosa	LN	NR8_15	5	0	LR2_45	0	1	H3	0		0	0	0	28	1	H3	0		0	0	0	60	1	H3	0		0	0	0	240	1	H3	1	C	1	5	0	273	1	H3	1	C	0	0	0
438	Lagoon	13	POC	P. verrucosa	LN	NR8_15	5	0	LR2_46	0	1	H3	0		0	0	0	28	1	H3	0		0	0	0	60	1	H3	0		0	0	0	240	1	H3	0		1	5	0	273	1	H3	0		0	0	0
439	Lagoon	13	POC	P. verrucosa	LN	NR8_15	5	0	LR2_47	0	1	H3	0		0	0	0	28	1	H3	0		0	0	0	60	1	H3	0		0	0	0	240	1	H3	0		1	5	0	273	1	H3	0		0	0	0
440	Lagoon	13	POC	P. verrucosa	LN	NR8_15	5	0	LR2_48	0	1	H3	0		0	0	0	28	1	H3	0		0	0	0	60	1	H3	0		0	0	0	240	1	H3	0		1	5	0	273	1	H3	1	C	0	0	0
441	Lagoon	14	POC	P. verrucosa	LN	NR7_25	5	0	LR2_49	0	1	H3	0		0	0	0	28	1	H3	0		0	0	0	60	1	H3	0		0	0	0	240	1	H3	0		1	5	0	273	1	H3	0		0	0	0
442	Lagoon	14	POC	P. verrucosa	LN	NR7_25	5	0	LR2_50	0	1	H3	0		0	0	0	28	1	H3	0		0	0	0	60	1	H3	0		0	0	0	240	1	H3	1	C	1	5	0	273	1	H3	1	C	0	0	0
443	Lagoon	14	POC	P. verrucosa	LN	NR7_25	5	0	LR2_51	0	1	H3	0		0	0	0	28	1	H3	0		0	0	0	60	1	H3	0		0	0	0	240	1	H3	0		1	5	0	273	1	H3	1	C	0	0	0
444	Lagoon	14	POC	P. verrucosa	LN	NR7_25	5	0	LR2_52	0	1	H3	0		0	0	0	28	1	H3	0		0	0	0	60	1	H3	0		0	0	0	240	1	H3	1	C	1	5	0	273	1	H3	1	C,C	0	0	0
445	Lagoon	14	POC	P. verrucosa	LN	NR7_25	5	0	LR2_53	0	1	H3	0		0	0	0	28	1	H3	0		0	0	0	60	1	H3	0		0	0	0	240	1	H3	1	C C	1	5	0	273	1	H3	1	C,C	0	0	0
446	Lagoon	14	POC	P. verrucosa	LN	NR7_25	5	0	LR2_54	0	1	H3	0		0	0	0	28	1	H3	0		0	0	0	60	1	H3	0		0	0	0	240	1	H3	1	C C	1	5	0	273	1	H3	0		0	0	0
447	Lagoon	14	POC	P. verrucosa	LN	NR7_25	5	0	LR2_55	0	1	H3	0		0	0	0	28	1	H3	0		0	0	0	60	1	H3	0		0	0	0	240	1	H3	0		1	5	0	273	1	H3	0		0	0	0
448	Lagoon	14	POC	P. verrucosa	LN	NR7_25	5	0	LR2_56	0	1	H3	0		0	0	0	28	1	H3	0		0	0	0	60	1	H3	0		0	0	0	240	1	H3	0		1	5	0	273	1	H3	1	C	0	0	0
[truncated: 24 more columns]

## Sheet: P GROWTH
Fragment_ID	Habitat	Colony	Genus	Orig_Nursery_S	Orig_Nursery	Depth	D_Group	Position	Days_T0	Condition_T0	M1_T0	M2_T0	M3_T0	Days_T3	Condition_T3	M1_T3	M2_T3	M3_T3	Days_T7	Condition_T7	M1_T7	M2_T7	M3_T7
1	Reef	1	POC	10	VRR	5	1	I-RR1_1	0	H3	82	30	21	240	H3	108	75	65	371	H3	135	95	90
2	Reef	1	POC	10	VRR	5	1	I-RR1_2	0	H3	72	35	20	240	H3	105	85	68	371	H3	124	95	95
3	Reef	1	POC	10	VRR	5	1	I-RR1_3	0	H3	70	43	24	240	H3	108	98	65	371	H3	130	110	97
4	Reef	1	POC	10	VRR	5	1	I-RR1_4	0	H3	100	40	30	240	H3	130	80	79	371	H3	155	110	110
5	Reef	1	POC	10	VRR	5	1	I-RR1_5	0	H3	86	40	21	240	H3	120	90	72	371	H3	150	104	102
6	Reef	1	POC	10	VRR	5	1	I-RR1_6	0	H3	43	35	24	240	H3	87	84	70	371	H3	120	105	95
7	Reef	1	POC	10	VRR	5	1	I-RR1_7	0	H3	45	20	17	240	H3	80	80	58	371	H3	105	90	90
8	Reef	1	POC	10	VRR	5	1	I-RR1_8	0	H3	54	24	17	240	H3	85	80	60	371	H3	114	94	90
9	Reef	2	POC	10	VRR	5	1	I-RR1_9	0	H3	52	31	24	240	H3	87	77	70	371	H3	118	102	96
10	Reef	2	POC	10	VRR	5	1	I-RR1_10	0	H3	60	36	17	240	H3	115	80	61	371	H3	125	105	92
11	Reef	2	POC	10	VRR	5	1	I-RR1_11	0	H3	78	30	20	240	H3	110	90	58	371	H3	140	106	90
12	Reef	2	POC	10	VRR	5	1	I-RR1_12	0	H3	54	40	30	240	H3	100	81	70	371	H3	120	104	86
13	Reef	2	POC	10	VRR	5	1	I-RR1_13	0	H3	45	28	19	240	H3	92	68	58	371	H3	115	94	83
14	Reef	2	POC	10	VRR	5	1	I-RR1_14	0	H3	60	21	18	240	H3	105	60	58	371	H3	130	97	90
15	Reef	2	POC	10	VRR	5	1	I-RR1_15	0	H3	60	45	28	240	H3	97	90	75	371	H3	130	115	97
16	Reef	2	POC	10	VRR	5	1	I-RR1_16	0	H3	60	58	27	240	H3	90	87	86	371	H3	125	120	100
17	Reef	3	POC	10	VRR	5	1	I-RR1_17	0	H3	78	30	24	240	H3	120	80	64	371	H3	140	95	90
18	Reef	3	POC	10	VRR	5	1	I-RR1_18	0	H3	60	32	20	240	H3	96	72	58	371	H3	120	95	87
19	Reef	3	POC	10	VRR	5	1	I-RR1_19	0	H3	65	55	32	240	H3	107	97	67	371	H3	130	120	89
20	Reef	3	POC	10	VRR	5	1	I-RR1_20	0	H3	75	35	25	240	H3	114	102	58	371	H3	135	120	80
21	Reef	3	POC	10	VRR	5	1	I-RR1_21	0	H3	42	35	25	240	H3	90	75	50	371	H3	110	97	77
22	Reef	3	POC	10	VRR	5	1	I-RR1_22	0	H3	61	25	21	240	H3	85	82	48	371	H3	112	97	78
23	Reef	3	POC	10	VRR	5	1	I-RR1_23	0	H3	54	36	21	240	H3	86	80	48	371	H3	116	92	75
24	Reef	3	POC	10	VRR	5	1	I-RR1_24	0	H3	66	28	17	240	H3	96	86	50	371	H3	118	82	80
25	Reef	4	POC	10	VRR	5	1	I-RR1_25	0	H3	56	25	25	240	H3	92	64	64	371	H3	120	94	85
26	Reef	4	POC	10	VRR	5	1	I-RR1_26	0	H3	54	38	17	240	H3	97	67	65	371	H3	110	110	85
27	Reef	4	POC	10	VRR	5	1	I-RR1_27	0	H3	55	27	26	240	H3	86	60	56	371	H3	105	85	80
28	Reef	4	POC	10	VRR	5	1	I-RR1_28	0	H3	45	20	18	240	H3	84	70	55	371	H3	105	80	72
29	Reef	4	POC	10	VRR	5	1	I-RR1_29	0	H3	50	22	18	240	H3	85	56	48	371	H3	110	94	69
30	Reef	4	POC	10	VRR	5	1	I-RR1_30	0	H3	55	22	21	240	H3	92	76	52	371	H3	105	100	80
31	Reef	4	POC	10	VRR	5	1	I-RR1_31	0	H3	55	35	24	240	H3	98	78	70	371	H3	120	118	96
32	Reef	4	POC	10	VRR	5	1	I-RR1_32	0	H3	50	28	22	240	H3	96	75	70	371	H2	115	90	86
33	Reef	5	POC	10	VRR	5	1	I-RR1_33	0	H3	60	50	32	240	H2	100	98	72	371	D
34	Reef	5	POC	10	VRR	5	1	I-RR1_34	0	H3	42	22	18	240	D				371	D
35	Reef	5	POC	10	VRR	5	1	I-RR1_35	0	H3	66	42	24	240	D				371	D
36	Reef	5	POC	10	VRR	5	1	I-RR1_36	0	H3	59	40	38	240	H3	95	90	80	371	H1	110	105	85
37	Reef	5	POC	10	VRR	5	1	I-RR1_37	0	H3	45	30	25	240	H3	100	78	75	371	D
38	Reef	5	POC	10	VRR	5	1	I-RR1_38	0	H3	40	32	24	240	D				371	D
39	Reef	5	POC	10	VRR	5	1	I-RR1_39	0	H3	62	38	30	240	D				371	D
40	Reef	5	POC	10	VRR	5	1	I-RR1_40	0	H3	49	30	19	240	D				371	D
41	Reef	6	POC	10	VRR	5	1	I-RR1_41	0	H3	28	20	14	240	D				371	D
42	Reef	6	POC	10	VRR	5	1	I-RR1_42	0	H3	58	45	22	240	D				371	D
43	Reef	6	POC	10	VRR	5	1	I-RR1_43	0	H3	44	37	22	240	D				371	D
44	Reef	6	POC	10	VRR	5	1	I-RR1_44	0	H3	55	40	40	240	H3	86	65	60	371	D
45	Reef	6	POC	10	VRR	5	1	I-RR1_45	0	H3	52	22	18	240	H3	88	62	58	371	H3	115	84	72
46	Reef	6	POC	10	VRR	5	1	I-RR1_46	0	H3	40	30	28	240	H3	92	75	70	371	H3	125	105	98
47	Reef	6	POC	10	VRR	5	1	I-RR1_47	0	H3	52	30	26	240	H3	87	73	65	371	H3	110	98	85
48	Reef	6	POC	10	VRR	5	1	I-RR1_48	0	H3	37	36	17	240	H3	82	82	68	371	H3	110	110	105
49	Reef	7	POC	10	VRR	5	1	I-RR1_49	0	H3	45	18	17	240	H3	92	62	57	371	H3	115	80	78
50	Reef	7	POC	10	VRR	5	1	I-RR1_50	0	H3	36	28	16	240	H3	80	70	62	371	H3	105	94	85
51	Reef	7	POC	10	VRR	5	1	I-RR1_51	0	H3	28	20	14	240	H3	82	60	48	371	H3	104	80	72
52	Reef	7	POC	10	VRR	5	1	I-RR1_52	0	H3	56	56	30	240	H3	106	90	75	371	H3	130	100	100
53	Reef	7	POC	10	VRR	5	1	I-RR1_53	0	H3	66	35	16	240	H3	114	86	70	371	H3	135	110	100
54	Reef	7	POC	10	VRR	5	1	I-RR1_54	0	H3	56	26	20	240	H3	105	75	70	371	H3	130	105	96
55	Reef	7	POC	10	VRR	5	1	I-RR1_55	0	H3	45	20	15	240	H3	90	70	55	371	H3	117	100	88
56	Reef	7	POC	10	VRR	5	1	I-RR1_56	0	H3	42	35	20	240	H3	92	80	78	371	H3	120	100	83
57	Reef	8	POC	20	LN	5	1	I-RR1_57	0	H3	60	50	30	240	H3	100	86	56	371	H3	120	107	80
58	Reef	8	POC	20	LN	5	1	I-RR1_58	0	H3	66	55	50	240	H3	105	92	92	371	H3	135	100	100
59	Reef	8	POC	20	LN	5	1	I-RR1_59	0	H3	72	57	50	240	H3	120	100	80	371	H3	140	115	112
60	Reef	8	POC	20	LN	5	1	I-RR1_60	0	H3	57	40	20	240	H3	108	85	70	371	H3	130	102	100
61	Reef	8	POC	20	LN	5	1	I-RR1_61	0	H3	50	47	25	240	H3	93	83	75	371	H3	118	110	95
62	Reef	8	POC	20	LN	5	1	I-RR1_62	0	H3	52	28	15	240	H3	90	75	53	371	H3	118	82	80
63	Reef	8	POC	20	LN	5	1	I-RR1_63	0	H3	45	20	14	240	H3	87	50	47	371	H3	105	78	78
64	Reef	8	POC	20	LN	5	1	I-RR1_64	0	H3	62	42	35	240	H3	110	105	70	371	H3	125	120	92
65	Reef	9	POC	20	LN	5	1	I-RR1_65	0	H3	50	26	17	240	H3	81	61	56	371	H3	104	85	84
66	Reef	9	POC	20	LN	5	1	I-RR1_66	0	H3	50	30	17	240	H3	65	63	56	371	H3	100	77	65
67	Reef	9	POC	20	LN	5	1	I-RR1_67	0	H3	50	36	32	240	H3	87	76	70	371	H3	110	100	90
68	Reef	9	POC	20	LN	5	1	I-RR1_68	0	H3	50	40	24	240	H3	82	80	63	371	H3	117	97	85
69	Reef	9	POC	20	LN	5	1	I-RR1_69	0	H3	40	18	17	240	H3	67	57	52	371	H3	100	96	80
70	Reef	9	POC	20	LN	5	1	I-RR1_70	0	H3	41	22	21	240	H3	70	55	54	371	H3	90	80	72
71	Reef	9	POC	20	LN	5	1	I-RR1_71	0	H3	37	20	20	240	H3	75	60	57	371	H3	98	83	83
72	Reef	9	POC	20	LN	5	1	I-RR1_72	0	H3	50	46	30	240	H3	85	85	68	371	H3	107	100	95
73	Reef	10	POC	20	LN	5	1	I-RR1_73	0	H3	53	47	40	240	H3	60	54	50	371	H3	80	77	72
74	Reef	10	POC	20	LN	5	1	I-RR1_74	0	H3	44	42	22	240	H3	84	65	58	371	H3	100	88	77
75	Reef	10	POC	20	LN	5	1	I-RR1_75	0	H3	49	30	28	240	H3	82	70	66	371	H3	106	90	90
76	Reef	10	POC	20	LN	5	1	I-RR1_76	0	H3	40	34	17	240	H3	80	70	54	371	H3	100	95	80
77	Reef	10	POC	20	LN	5	1	I-RR1_77	0	H3	51	38	34	240	H3	80	80	65	371	H3	100	97	85
78	Reef	10	POC	20	LN	5	1	I-RR1_78	0	H3	48	31	21	240	H3	80	65	60	371	H3	100	80	80
79	Reef	10	POC	20	LN	5	1	I-RR1_79	0	H3	42	31	19	240	H3	70	52	45	371	H2	85	66	60
80	Reef	10	POC	20	LN	5	1	I-RR1_80	0	H3	53	46	21	240	H3	82	80	62	371	H3	107	101	81
81	Reef	11	POC	20	LN	5	1	I-RR1_81	0	H3	53	37	29	240	H3	90	70	60	371	H3	105	100	85
82	Reef	11	POC	20	LN	5	1	I-RR1_82	0	H3	53	45	38	240	H3	85	82	70	371	H3	115	100	82
83	Reef	11	POC	20	LN	5	1	I-RR1_83	0	H3	44	28	22	240	H3	75	60	60	371	H3	90	86	80
84	Reef	11	POC	20	LN	5	1	I-RR1_84	0	H3	55	46	40	240	H3	90	90	73	371	H3	110	110	95
85	Reef	11	POC	20	LN	5	1	I-RR1_85	0	H3	46	20	13	240	H3	75	66	55	371	H3	95	91	80
86	Reef	11	POC	20	LN	5	1	I-RR1_86	0	H3	44	42	28	240	H3	78	70	63	371	H3	105	90	90
87	Reef	11	POC	20	LN	5	1	I-RR1_87	0	H3	44	41	15	240	H3	84	61	55	371	H3	107	95	80
88	Reef	11	POC	20	LN	5	1	I-RR1_88	0	H3	48	29	24	240	H3	81	57	55	371	H3	100	85	85
89	Reef	12	POC	20	LN	5	1	I-RR1_89	0	H3	37	31	18	240	H3	60	50	40	371	H3	87	70	65
90	Reef	12	POC	20	LN	5	1	I-RR1_90	0	H3	33	32	24	240	H3	58	45	44	371	H3	72	68	68
91	Reef	12	POC	20	LN	5	1	I-RR1_91	0	H3	48	36	26	240	H3	65	56	53	371	H3	82	87	73
92	Reef	12	POC	20	LN	5	1	I-RR1_92	0	H3	52	39	27	240	H3	85	65	60	371	H3	105	86	82
93	Reef	12	POC	20	LN	5	1	I-RR1_93	0	H3	37	24	24	240	H3	67	55	51	371	H3	85	75	65
94	Reef	12	POC	20	LN	5	1	I-RR1_94	0	H3	54	50	21	240	H3	93	80	59	371	H3	115	90	88
95	Reef	12	POC	20	LN	5	1	I-RR1_95	0	H3	30	26	12	240	H3	50	42	38	371	H3	70	60	60
96	Reef	12	POC	20	LN	5	1	I-RR1_96	0	H3	28	22	18	240	H3	60	50	47	371	H3	85	70	70
97	Reef	13	POC	20	LN	5	1	I-RR1_97	0	H3	70	51	40	240	H3	100	95	80	371	H3	130	125	120
98	Reef	13	POC	20	LN	5	1	I-RR1_98	0	H3	45	23	16	240	H3	82	68	50	371	H3	105	92	87
99	Reef	13	POC	20	LN	5	1	I-RR1_99	0	H3	53	30	19	240	H3	105	75	60	371	H3	130	90	78
100	Reef	13	POC	20	LN	5	1	I-RR1_100	0	H3	57	31	15	240	H3	92	80	60	371	H3	125	95	85
101	Reef	13	POC	20	LN	5	1	I-RR1_101	0	H3	52	23	17	240	H3	90	59	55	371	H3	112	87	80
102	Reef	13	POC	20	LN	5	1	I-RR1_102	0	H3	51	19	13	240	H3	97	70	55	371	H3	120	90	87
103	Reef	13	POC	20	LN	5	1	I-RR1_103	0	H3	45	26	25	240	H3	90	83	72	371	H3	120	100	95
104	Reef	13	POC	20	LN	5	1	I-RR1_104	0	H3	49	25	19	240	H3	85	71	60	371	H3	110	110	93
105	Reef	14	POC	20	LN	5	1	I-RR1_105	0	H3	67	67	43	240	H3	115	100	90	371	H3	125	115	115
106	Reef	14	POC	20	LN	5	1	I-RR1_106	0	H3	65	36	35	240	H3	110	85	78	371	H3	140	110	100
107	Reef	14	POC	20	LN	5	1	I-RR1_107	0	H3	55	35	27	240	H3	102	85	74	371	H3	120	110	100
108	Reef	14	POC	20	LN	5	1	I-RR1_108	0	H3	50	41	28	240	H3	87	80	75	371	H3	110	105	99
109	Reef	14	POC	20	LN	5	1	I-RR1_109	0	H3	51	34	32	240	H3	100	88	85	371	H3	120	110	103
110	Reef	14	POC	20	LN	5	1	I-RR1_110	0	H3	49	48	32	240	H3	100	90	75	371	H3	116	107	105
111	Reef	14	POC	20	LN	5	1	I-RR1_111	0	H3	63	39	45	240	H2	100	90	86	371	H2	120	106	102
112	Reef	14	POC	20	LN	5	1	I-RR1_112	0	H3	46	30	25	240	H3	90	70	68	371	H3	115	100	100
113	Reef	1	POC	10	VRR	10	2	I-RR2_1	0	H3	79	43	31	240	D				371	D
114	Reef	1	POC	10	VRR	10	2	I-RR2_2	0	H3	89	50	30	240	H3	117	100	70	371	H2	130	110	90
115	Reef	1	POC	10	VRR	10	2	I-RR2_3	0	H3	88	60	24	240	H2	95	95	44	371	D
116	Reef	1	POC	10	VRR	10	2	I-RR2_4	0	H3	75	25	20	240	H3	102	75	60	371	H2	120	90	75
117	Reef	1	POC	10	VRR	10	2	I-RR2_5	0	H3	60	53	19	240	H3	105	83	75	371	H3	130	104	76
118	Reef	1	POC	10	VRR	10	2	I-RR2_6	0	H3	47	46	29	240	H3	90	72	46	371	H3	108	105	76
119	Reef	1	POC	10	VRR	10	2	I-RR2_7	0	H3	44	22	17	240	H3	75	75	62	371	H3	105	89	73
120	Reef	1	POC	10	VRR	10	2	I-RR2_8	0	H3	84	26	23	240	H3	80	62	55	371	H3	105	75	70
121	Reef	2	POC	10	VRR	10	2	I-RR2_9	0	H3	58	23	22	240	H3	95	65	48	371	H3	115	82	75
122	Reef	2	POC	10	VRR	10	2	I-RR2_10	0	H3	50	34	30	240	H3	85	70	65	371	H3	107	85	74
123	Reef	2	POC	10	VRR	10	2	I-RR2_11	0	H3	70	38	36	240	H3	106	72	70	371	H3	130	97	95
124	Reef	2	POC	10	VRR	10	2	I-RR2_12	0	H3	55	41	16	240	H3	85	70	60	371	H3	114	92	80
125	Reef	2	POC	10	VRR	10	2	I-RR2_13	0	H3	45	26	25	240	H3	86	68	50	371	H2	106	75	72
126	Reef	2	POC	10	VRR	10	2	I-RR2_14	0	H3	59	34	29	240	H2	87	60	58	371	D
127	Reef	2	POC	10	VRR	10	2	I-RR2_15	0	H3	56	22	19	240	D				371	D
128	Reef	2	POC	10	VRR	10	2	I-RR2_16	0	H3	60	49	18	240	D				371	D
129	Reef	3	POC	10	VRR	10	2	I-RR2_17	0	H3	65	54	30	240	D				371	D
130	Reef	3	POC	10	VRR	10	2	I-RR2_18	0	H3	55	26	18	240	H2	82	52	50	371	H2	100	58	52
131	Reef	3	POC	10	VRR	10	2	I-RR2_19	0	H3	69	53	25	240	H3	105	85	60	371	H3	128	104	82
132	Reef	3	POC	10	VRR	10	2	I-RR2_20	0	H3	63	34	23	240	H3	90	86	52	371	H3	103	92	75
133	Reef	3	POC	10	VRR	10	2	I-RR2_21	0	H3	72	23	18	240	H3	95	80	53	371	H3	115	82	80
134	Reef	3	POC	10	VRR	10	2	I-RR2_22	0	H3	49	23	23	240	H3	84	64	43	371	H3	100	85	61
135	Reef	3	POC	10	VRR	10	2	I-RR2_23	0	H3	81	37	20	240	H3	110	68	61	371	H3	134	87	77
136	Reef	3	POC	10	VRR	10	2	I-RR2_24	0	H3	42	35	23	240	H3	78	68	45	371	H3	100	85	70
137	Reef	4	POC	10	VRR	10	2	I-RR2_25	0	H3	58	29	18	240	H3	92	70	64	371	H3	110	93	85
138	Reef	4	POC	10	VRR	10	2	I-RR2_26	0	H3	36	25	19	240	H3	75	70	65	371	H3	103	100	83
139	Reef	4	POC	10	VRR	10	2	I-RR2_27	0	H3	59	26	17	240	H3	100	74	63	371	H3	120	100	95
140	Reef	4	POC	10	VRR	10	2	I-RR2_28	0	H3	58	47	34	240	H3	100	74	60	371	H3	122	105	82
141	Reef	4	POC	10	VRR	10	2	I-RR2_29	0	H3	49	28	22	240	H3	85	60	62	371	H3	103	90	83
142	Reef	4	POC	10	VRR	10	2	I-RR2_30	0	H3	51	24	19	240	H3	84	80	63	371	H3	110	90	83
143	Reef	4	POC	10	VRR	10	2	I-RR2_31	0	H3	49	41	19	240	H3	85	78	60	371	H3	117	110	84
144	Reef	4	POC	10	VRR	10	2	I-RR2_32	0	H3	48	39	19	240	H3	90	90	70	371	H3	112	103	73
145	Reef	5	POC	10	VRR	10	2	I-RR2_33	0	H3	57	48	16	240	H3	100	81	67	371	H3	118	98	70
146	Reef	5	POC	10	VRR	10	2	I-RR2_34	0	H3	46	26	15	240	H3	72	65	58	371	H3	94	80	79
147	Reef	5	POC	10	VRR	10	2	I-RR2_35	0	H3	52	41	24	240	H3	94	80	70	371	H3	120	110	90
148	Reef	5	POC	10	VRR	10	2	I-RR2_36	0	H3	55	52	48	240	H3	96	96	80	371	H3	119	110	100
149	Reef	5	POC	10	VRR	10	2	I-RR2_37	0	H3	71	43	33	240	H3	118	90	80	371	H3	145	115	105
150	Reef	5	POC	10	VRR	10	2	I-RR2_38	0	H3	63	37	26	240	H3	95	76	65	371	H3	115	95	89
151	Reef	5	POC	10	VRR	10	2	I-RR2_39	0	H3	61	57	19	240	H3	120	90	76	371	H3	130	120	90
152	Reef	5	POC	10	VRR	10	2	I-RR2_40	0	H3	50	30	26	240	H3	97	73	68	371	H3	120	97	93
153	Reef	6	POC	10	VRR	10	2	I-RR2_41	0	H3	56	34	21	240	H3	87	69	53	371	H3	105	80	80
154	Reef	6	POC	10	VRR	10	2	I-RR2_42	0	H3	55	33	20	240	H3	84	60	59	371	H3	102	87	70
155	Reef	6	POC	10	VRR	10	2	I-RR2_43	0	H3	48	26	11	240	H3	82	71	47	371	H3	105	95	73
156	Reef	6	POC	10	VRR	10	2	I-RR2_44	0	H3	48	45	17	240	H3	85	70	50	371	H3	100	84	65
157	Reef	6	POC	10	VRR	10	2	I-RR2_45	0	H3	37	19	16	240	H3	70	56	52	371	H3	95	90	80
158	Reef	6	POC	10	VRR	10	2	I-RR2_46	0	H3	39	30	28	240	H3	75	72	70	371	H3	104	92	90
159	Reef	6	POC	10	VRR	10	2	I-RR2_47	0	H3	38	34	12	240	H3	72	50	50	371	H3	90	72	70
160	Reef	6	POC	10	VRR	10	2	I-RR2_48	0	H3	29	27	12	240	H3	67	50	35	371	H3	77	75	58
161	Reef	7	POC	10	VRR	10	2	I-RR2_49	0	H3	49	15	14	240	H3	85	65	43	371	H3	105	80	70
162	Reef	7	POC	10	VRR	10	2	I-RR2_50	0	H3	52	18	17	240	H3	76	65	45	371	H3	105	75	65
163	Reef	7	POC	10	VRR	10	2	I-RR2_51	0	H3	38	25	18	240	H3	75	65	50	371	H3	92	92	70
164	Reef	7	POC	10	VRR	10	2	I-RR2_52	0	H3	45	19	12	240	H3	85	55	54	371	H3	105	80	75
165	Reef	7	POC	10	VRR	10	2	I-RR2_53	0	H3	50	36	24	240	H3	90	78	78	371	H3	111	100	80
166	Reef	7	POC	10	VRR	10	2	I-RR2_54	0	H3	54	29	29	240	H3	90	79	55	371	H3	115	85	70
167	Reef	7	POC	10	VRR	10	2	I-RR2_55	0	H3	65	24	24	240	H3	105	75	61	371	H3	122	92	80
168	Reef	7	POC	10	VRR	10	2	I-RR2_56	0	H3	61	19	17	240	H3	105	70	57	371	H3	115	95	80
169	Reef	8	POC	20	LN	10	2	I-RR2_57	0	H3	58	55	25	240	H3	96	80	60	371	H3	110	100	80
170	Reef	8	POC	20	LN	10	2	I-RR2_58	0	H3	74	55	51	240	H3	106	85	80	371	H3	115	110	100
171	Reef	8	POC	20	LN	10	2	I-RR2_59	0	H3	65	51	34	240	H3	89	78	70	371	H3	115	105	95
172	Reef	8	POC	20	LN	10	2	I-RR2_60	0	H3	70	50	46	240	H3	100	97	80	371	H3	115	112	96
173	Reef	8	POC	20	LN	10	2	I-RR2_61	0	H3	52	45	16	240	H3	87	67	55	371	H3	110	85	70
174	Reef	8	POC	20	LN	10	2	I-RR2_62	0	H3	54	33	23	240	H3	91	55	55	371	H3	108	75	65
175	Reef	8	POC	20	LN	10	2	I-RR2_63	0	H3	46	17	14	240	H3	81	55	45	371	H3	103	83	70
176	Reef	8	POC	20	LN	10	2	I-RR2_64	0	H3	47	18	15	240	H3	75	60	49	371	H3	108	80	70
177	Reef	9	POC	20	LN	10	2	I-RR2_65	0	H3	52	33	22	240	H3	80	53	51	371	H3	95	73	70
178	Reef	9	POC	20	LN	10	2	I-RR2_66	0	H3	54	47	27	240	H3	65	56	44	371	H3	90	80	65
179	Reef	9	POC	20	LN	10	2	I-RR2_67	0	H3	53	14	13	240	H3	70	50	43	371	H3	90	71	62
180	Reef	9	POC	20	LN	10	2	I-RR2_68	0	H3	48	37	31	240	H3	82	58	51	371	H3	105	80	75
181	Reef	9	POC	20	LN	10	2	I-RR2_69	0	H3	47	43	21	240	H3	76	68	61	371	H3	96	86	65
182	Reef	9	POC	20	LN	10	2	I-RR2_70	0	H3	49	30	29	240	H3	80	60	50	371	H3	100	81	70
183	Reef	9	POC	20	LN	10	2	I-RR2_71	0	H3	49	27	25	240	H3	74	55	55	371	H3	82	80	75
184	Reef	9	POC	20	LN	10	2	I-RR2_72	0	H3	42	33	19	240	H3	70	55	55	371	H3	95	77	77
185	Reef	10	POC	20	LN	10	2	I-RR2_73	0	H3	54	45	36	240	H3	87	75	70	371	H3	95	90	70
186	Reef	10	POC	20	LN	10	2	I-RR2_74	0	H3	48	47	33	240	H3	76	70	50	371	H3	93	85	72
187	Reef	10	POC	20	LN	10	2	I-RR2_75	0	H3	38	33	26	240	H3	69	52	52	371	H3	88	80	72
188	Reef	10	POC	20	LN	10	2	I-RR2_76	0	H3	50	38	32	240	H3	78	65	59	371	H3	93	90	82
189	Reef	10	POC	20	LN	10	2	I-RR2_77	0	H3	41	35	33	240	H3	67	62	55	371	H3	80	70	70
190	Reef	10	POC	20	LN	10	2	I-RR2_78	0	H3	45	29	26	240	H3	77	55	50	371	H3	90	80	55
191	Reef	10	POC	20	LN	10	2	I-RR2_79	0	H3	47	46	27	240	H3	75	72	53	371	H3	90	85	70
192	Reef	10	POC	20	LN	10	2	I-RR2_80	0	H3	51	40	36	240	H3	75	70	50	371	H3	90	70	68
193	Reef	11	POC	20	LN	10	2	I-RR2_81	0	H3	53	35	35	240	H3	80	55	45	371	H3	96	75	72
194	Reef	11	POC	20	LN	10	2	I-RR2_82	0	H3	38	27	27	240	H3	67	57	47	371	H3	87	70	70
195	Reef	11	POC	20	LN	10	2	I-RR2_83	0	H3	58	49	39	240	H3	90	64	61	371	H3	102	88	77
196	Reef	11	POC	20	LN	10	2	I-RR2_84	0	H3	46	28	27	240	H3	70	70	55	371	H3	94	74	72
197	Reef	11	POC	20	LN	10	2	I-RR2_85	0	H3	53	36	32	240	H3	87	70	65	371	H3	110	86	83
198	Reef	11	POC	20	LN	10	2	I-RR2_86	0	H3	43	36	30	240	H3	72	54	50	371	H3	93	75	65
199	Reef	11	POC	20	LN	10	2	I-RR2_87	0	H3	45	22	14	240	H3	70	50	43	371	H3	90	70	64
200	Reef	11	POC	20	LN	10	2	I-RR2_88	0	H3	47	32	19	240	H3	75	60	46	371	H3	97	80	65
201	Reef	12	POC	20	LN	10	2	I-RR2_89	0	H3	46	40	9	240	H3	70	60	47	371	H3	90	80	65
202	Reef	12	POC	20	LN	10	2	I-RR2_90	0	H3	39	25	20	240	H3	70	55	50	371	H3	90	70	62
203	Reef	12	POC	20	LN	10	2	I-RR2_91	0	H3	55	32	28	240	H3	79	71	59	371	H3	90	82	73
204	Reef	12	POC	20	LN	10	2	I-RR2_92	0	H3	28	22	9	240	H3	45	45	35	371	H3	65	62	47
205	Reef	12	POC	20	LN	10	2	I-RR2_93	0	H3	48	42	33	240	H3	72	70	64	371	H2	93	80	79
206	Reef	12	POC	20	LN	10	2	I-RR2_94	0	H3	45	24	23	240	H3	70	50	48	371	H3	86	68	62
207	Reef	12	POC	20	LN	10	2	I-RR2_95	0	H3	32	27	26	240	H3	59	50	49	371	H3	75	62	60
208	Reef	12	POC	20	LN	10	2	I-RR2_96	0	H3	54	42	30	240	H3	80	60	57	371	H3	95	85	78
209	Reef	13	POC	20	LN	10	2	I-RR2_97	0	H3	75	39	30	240	H3	100	75	63	371	H3	120	95	90
210	Reef	13	POC	20	LN	10	2	I-RR2_98	0	H3	51	35	35	240	H3	90	75	60	371	H3	117	97	75
211	Reef	13	POC	20	LN	10	2	I-RR2_99	0	H3	71	45	18	240	H3	96	80	75	371	H3	115	108	85
212	Reef	13	POC	20	LN	10	2	I-RR2_100	0	H3	57	50	27	240	H3	91	89	60	371	H3	115	115	90
213	Reef	13	POC	20	LN	10	2	I-RR2_101	0	H3	40	31	16	240	H3	80	62	52	371	H3	98	85	75
214	Reef	13	POC	20	LN	10	2	I-RR2_102	0	H3	58	38	29	240	H3	93	80	70	371	H3	112	88	85
215	Reef	13	POC	20	LN	10	2	I-RR2_103	0	H3	49	17	11	240	H3	69	55	45	371	H3	86	75	70
216	Reef	13	POC	20	LN	10	2	I-RR2_104	0	H3	58	22	16	240	H3	82	57	40	371	D
217	Reef	14	POC	20	LN	10	2	I-RR2_105	0	H3	71	52	26	240	D				371	D
218	Reef	14	POC	20	LN	10	2	I-RR2_106	0	H3	45	32	31	240	D				371	D
219	Reef	14	POC	20	LN	10	2	I-RR2_107	0	H3	56	40	20	240	D				371	D
220	Reef	14	POC	20	LN	10	2	I-RR2_108	0	H3	58	54	35	240	H3	100	80	72	371	H1	112	107	82
221	Reef	14	POC	20	LN	10	2	I-RR2_109	0	H3	55	47	43	240	H3	92	78	75	371	H3	105	105	85
222	Reef	14	POC	20	LN	10	2	I-RR2_110	0	H3	51	49	25	240	H3	93	88	70	371	H3	110	110	85
223	Reef	14	POC	20	LN	10	2	I-RR2_111	0	H3	58	52	41	240	H3	92	90	70	371	H3	110	105	95
224	Reef	14	POC	20	LN	10	2	I-RR2_112	0	H3	49	28	20	240	H3	87	60	55	371	H3	95	85	72
225	Reef	1	POC	10	VRR	15	3	I-RR3_1	0	H3	78	42	22	240	H3	110	76	51	371	H2	130	90	80
226	Reef	1	POC	10	VRR	15	3	I-RR3_2	0	H3	56	48	14	240	H3	90	80	53	371	H3	110	97	76
227	Reef	1	POC	10	VRR	15	3	I-RR3_3	0	H3	52	42	34	240	H3	80	62	58	371	H3	103	85	76
228	Reef	1	POC	10	VRR	15	3	I-RR3_4	0	H3	73	32	20	240	H3	100	62	52	371	H3	120	76	72
229	Reef	1	POC	10	VRR	15	3	I-RR3_5	0	H3	54	30	24	240	H3	84	65	48	371	H3	105	74	68
230	Reef	1	POC	10	VRR	15	3	I-RR3_6	0	H3	75	24	20	240	H3	97	65	42	371	H3	112	87	57
231	Reef	1	POC	10	VRR	15	3	I-RR3_7	0	H3	44	35	15	240	H3	75	52	41	371	H3	94	72	63
232	Reef	1	POC	10	VRR	15	3	I-RR3_8	0	H3	49	42	14	240	H3	70	65	46	371	H3	88	78	67
233	Reef	2	POC	10	VRR	15	3	I-RR3_9	0	H3	56	36	20	240	H3	95	66	45	371	H3	112	86	65
234	Reef	2	POC	10	VRR	15	3	I-RR3_10	0	H3	54	34	19	240	H3	84	58	48	371	H3	104	75	70
235	Reef	2	POC	10	VRR	15	3	I-RR3_11	0	H3	62	37	27	240	H3	98	65	52	371	H3	120	78	75
236	Reef	2	POC	10	VRR	15	3	I-RR3_12	0	H3	66	35	31	240	H3	95	63	60	371	H3	115	76	73
237	Reef	2	POC	10	VRR	15	3	I-RR3_13	0	H3	53	33	20	240	H3	80	62	50	371	H3	109	87	64
238	Reef	2	POC	10	VRR	15	3	I-RR3_14	0	H3	61	39	19	240	H3	92	62	60	371	H3	112	85	80
239	Reef	2	POC	10	VRR	15	3	I-RR3_15	0	H3	64	31	24	240	H3	93	58	48	371	H3	116	68	65
240	Reef	2	POC	10	VRR	15	3	I-RR3_16	0	H3	50	48	42	240	H3	80	70	65	371	H3	102	96	80
241	Reef	3	POC	10	VRR	15	3	I-RR3_17	0	H3	58	25	23	240	H3	90	70	45	371	H3	111	80	56
242	Reef	3	POC	10	VRR	15	3	I-RR3_18	0	H3	77	55	32	240	H3	107	76	56	371	H3	111	86	75
243	Reef	3	POC	10	VRR	15	3	I-RR3_19	0	H3	62	25	17	240	H3	88	65	43	371	H3	109	85	55
244	Reef	3	POC	10	VRR	15	3	I-RR3_20	0	H3	62	32	26	240	H3	80	60	54	371	H3	91	82	75
245	Reef	3	POC	10	VRR	15	3	I-RR3_21	0	H3	59	32	22	240	H3	83	78	50	371	H3	104	74	67
246	Reef	3	POC	10	VRR	15	3	I-RR3_22	0	H3	80	40	20	240	H3	95	68	42	371	H3	104	73	70
247	Reef	3	POC	10	VRR	15	3	I-RR3_23	0	H3	61	35	22	240	H3	87	82	42	371	H3	97	94	62
248	Reef	3	POC	10	VRR	15	3	I-RR3_24	0	H3	73	40	25	240	H3	105	80	52	371	H3	125	80	76
249	Reef	4	POC	10	VRR	15	3	I-RR3_25	0	H3	42	34	17	240	H3	70	58	52	371	H3	94	80	74
250	Reef	4	POC	10	VRR	15	3	I-RR3_26	0	H3	37	32	17	240	H3	75	68	40	371	H3	95	91	62
251	Reef	4	POC	10	VRR	15	3	I-RR3_27	0	H3	46	22	18	240	H3	74	67	45	371	H3	99	85	55
252	Reef	4	POC	10	VRR	15	3	I-RR3_28	0	H3	48	32	18	240	H3	76	75	42	371	H3	100	100	65
253	Reef	4	POC	10	VRR	15	3	I-RR3_29	0	H3	48	31	18	240	H3	78	72	55	371	H3	100	98	55
254	Reef	4	POC	10	VRR	15	3	I-RR3_30	0	H3	41	40	21	240	H3	68	54	38	371	D
255	Reef	4	POC	10	VRR	15	3	I-RR3_31	0	H3	50	22	20	240	H3	70	50	32	371	D
256	Reef	4	POC	10	VRR	15	3	I-RR3_32	0	H3	50	21	20	240	H3	78	72	56	371	H3	103	92	65
257	Reef	5	POC	10	VRR	15	3	I-RR3_33	0	H3	41	32	21	240	H3	85	64	55	371	H3	100	82	74
258	Reef	5	POC	10	VRR	15	3	I-RR3_34	0	H3	50	32	22	240	H3	77	68	61	371	H3	105	86	80
259	Reef	5	POC	10	VRR	15	3	I-RR3_35	0	H3	40	24	17	240	H3	70	60	50	371	H3	93	75	65
260	Reef	5	POC	10	VRR	15	3	I-RR3_36	0	H3	33	33	25	240	H3	78	74	50	371	D
261	Reef	5	POC	10	VRR	15	3	I-RR3_37	0	H3	62	43	32	240	H3	97	80	75	371	H1	112	85	85
262	Reef	5	POC	10	VRR	15	3	I-RR3_38	0	H3	56	38	22	240	H3	90	85	44	371	H3	112	106	85
263	Reef	5	POC	10	VRR	15	3	I-RR3_39	0	H3	55	40	28	240	H3	75	75	60	371	H3	100	98	90
264	Reef	5	POC	10	VRR	15	3	I-RR3_40	0	H3	42	32	18	240	H3	70	70	60	371	H3	95	88	85
265	Reef	6	POC	10	VRR	15	3	I-RR3_41	0	H3	41	26	17	240	H3	72	60	35	371	H3	92	75	50
266	Reef	6	POC	10	VRR	15	3	I-RR3_42	0	H3	50	32	25	240	H3	77	72	45	371	H3	102	79	60
267	Reef	6	POC	10	VRR	15	3	I-RR3_43	0	H3	53	40	23	240	H3	82	65	65	371	H3	99	82	70
268	Reef	6	POC	10	VRR	15	3	I-RR3_44	0	H3	43	38	20	240	H3	73	68	50	371	H3	90	90	65
269	Reef	6	POC	10	VRR	15	3	I-RR3_45	0	H3	42	20	17	240	H3	62	56	33	371	H3	90	86	70
270	Reef	6	POC	10	VRR	15	3	I-RR3_46	0	H3	45	25	12	240	H3	66	60	40	371	H3	83	68	60
271	Reef	6	POC	10	VRR	15	3	I-RR3_47	0	H3	45	35	17	240	H3	75	65	60	371	H3	97	86	78
272	Reef	6	POC	10	VRR	15	3	I-RR3_48	0	H3	50	32	27	240	H3	85	70	48	371	H3	107	95	70
273	Reef	7	POC	10	VRR	15	3	I-RR3_49	0	H3	35	20	17	240	H3	68	56	30	371	H3	91	70	51
274	Reef	7	POC	10	VRR	15	3	I-RR3_50	0	H3	42	27	20	240	H3	85	72	55	371	H3	108	84	72
275	Reef	7	POC	10	VRR	15	3	I-RR3_51	0	H3	58	40	27	240	H3	86	80	60	371	H3	105	100	75
276	Reef	7	POC	10	VRR	15	3	I-RR3_52	0	H3	56	21	17	240	H3	92	59	42	371	H3	110	76	65
277	Reef	7	POC	10	VRR	15	3	I-RR3_53	0	H3	57	21	17	240	H3	75	55	40	371	H3	89	75	66
278	Reef	7	POC	10	VRR	15	3	I-RR3_54	0	H3	52	26	17	240	H3	86	66	43	371	H3	105	90	72
279	Reef	7	POC	10	VRR	15	3	I-RR3_55	0	H3	35	26	17	240	H3	70	60	48	371	H3	86	80	62
280	Reef	7	POC	10	VRR	15	3	I-RR3_56	0	H3	27	22	17	240	H3	56	50	34	371	H3	75	66	40
281	Reef	8	POC	20	LN	15	3	I-RR3_57	0	H3	72	40	28	240	H3	100	67	61	371	H3	118	96	80
282	Reef	8	POC	20	LN	15	3	I-RR3_58	0	H3	70	22	15	240	H3	93	42	40	371	H3	100	66	65
283	Reef	8	POC	20	LN	15	3	I-RR3_59	0	H3	55	40	16	240	H3	78	53	40	371	H3	97	70	68
284	Reef	8	POC	20	LN	15	3	I-RR3_60	0	H3	66	32	23	240	H3	97	60	45	371	H3	104	80	70
285	Reef	8	POC	20	LN	15	3	I-RR3_61	0	H3	48	40	20	240	H3	75	40	38	371	H3	97	65	60
286	Reef	8	POC	20	LN	15	3	I-RR3_62	0	H3	42	26	24	240	H3	72	45	42	371	H3	95	65	64
287	Reef	8	POC	20	LN	15	3	I-RR3_63	0	H3	50	28	13	240	H3	85	45	42	371	H3	105	65	60
288	Reef	8	POC	20	LN	15	3	I-RR3_64	0	H3	46	30	18	240	H3	75	42	40	371	H3	94	65	60
289	Reef	9	POC	20	LN	15	3	I-RR3_65	0	H3	58	42	32	240	H3	80	62	53	371	H3	97	80	64
290	Reef	9	POC	20	LN	15	3	I-RR3_66	0	H3	42	38	20	240	H3	66	60	40	371	H3	83	82	35
291	Reef	9	POC	20	LN	15	3	I-RR3_67	0	H3	62	52	40	240	H3	88	83	75	371	H3	110	90	86
292	Reef	9	POC	20	LN	15	3	I-RR3_68	0	H3	55	36	18	240	H3	80	53	45	371	H3	104	70	64
293	Reef	9	POC	20	LN	15	3	I-RR3_69	0	H3	37	24	20	240	H3	53	45	35	371	H3	75	62	58
294	Reef	9	POC	20	LN	15	3	I-RR3_70	0	H3	47	40	20	240	H3	70	55	50	371	D
295	Reef	9	POC	20	LN	15	3	I-RR3_71	0	H3	33	33	22	240	H1	50	50	34	371	D
296	Reef	9	POC	20	LN	15	3	I-RR3_72	0	H3	45	35	32	240	H3	68	56	54	371	D
297	Reef	10	POC	20	LN	15	3	I-RR3_73	0	H3	44	34	22	240	H3	61	44	40	371	H3	73	55	50
298	Reef	10	POC	20	LN	15	3	I-RR3_74	0	H3	58	54	38	240	H3	80	65	60	371	H3	95	76	75
299	Reef	10	POC	20	LN	15	3	I-RR3_75	0	H3	49	42	18	240	H3	68	54	50	371	H3	80	65	62
300	Reef	10	POC	20	LN	15	3	I-RR3_76	0	H3	42	35	32	240	H3	64	55	45	371	H3	77	70	55
301	Reef	10	POC	20	LN	15	3	I-RR3_77	0	H3	62	42	35	240	H3	76	58	58	371	H3	92	70	69
302	Reef	10	POC	20	LN	15	3	I-RR3_78	0	H3	68	52	20	240	H3	80	70	60	371	H3	87	87	60
303	Reef	10	POC	20	LN	15	3	I-RR3_79	0	H3	50	45	20	240	H3	68	46	36	371	H3	84	65	45
304	Reef	10	POC	20	LN	15	3	I-RR3_80	0	H3	35	28	20	240	H3	50	48	32	371	H3	61	54	48
305	Reef	11	POC	20	LN	15	3	I-RR3_81	0	H3	55	52	50	240	H3	80	75	75	371	H3	100	98	90
306	Reef	11	POC	20	LN	15	3	I-RR3_82	0	H3	54	39	12	240	H3	75	48	40	371	H3	90	72	56
307	Reef	11	POC	20	LN	15	3	I-RR3_83	0	H3	48	47	31	240	H3	72	62	50	371	H3	93	80	62
308	Reef	11	POC	20	LN	15	3	I-RR3_84	0	H3	53	43	18	240	H3	74	58	40	371	H3	84	70	65
309	Reef	11	POC	20	LN	15	3	I-RR3_85	0	H3	46	38	13	240	H3	64	44	42	371	H3	82	68	64
310	Reef	11	POC	20	LN	15	3	I-RR3_86	0	H3	47	30	14	240	H3	65	46	35	371	H3	86	72	58
311	Reef	11	POC	20	LN	15	3	I-RR3_87	0	H3	54	48	41	240	H3	80	70	60	371	H3	97	95	83
312	Reef	11	POC	20	LN	15	3	I-RR3_88	0	H3	36	22	11	240	H3	58	32	32	371	H3	70	60	50
313	Reef	12	POC	20	LN	15	3	I-RR3_89	0	H3	52	50	46	240	H3	68	68	58	371	H3	82	74	74
314	Reef	12	POC	20	LN	15	3	I-RR3_90	0	H3	58	49	45	240	H3	82	80	50	371	H3	96	95	67
315	Reef	12	POC	20	LN	15	3	I-RR3_91	0	H3	40	26	14	240	H3	57	38	35	371	H3	70	53	50
316	Reef	12	POC	20	LN	15	3	I-RR3_92	0	H3	41	23	13	240	H3	56	40	40	371	H3	67	66	52
317	Reef	12	POC	20	LN	15	3	I-RR3_93	0	H3	35	26	25	240	H3	58	50	48	371	H3	73	67	60
318	Reef	12	POC	20	LN	15	3	I-RR3_94	0	H3	34	30	17	240	H3	55	36	30	371	H3	70	52	48
319	Reef	12	POC	20	LN	15	3	I-RR3_95	0	H3	43	35	26	240	H3	60	53	45	371	H3	72	65	54
320	Reef	12	POC	20	LN	15	3	I-RR3_96	0	H3	29	15	14	240	H3	47	35	30	371	H3	61	45	43
321	Reef	13	POC	20	LN	15	3	I-RR3_97	0	H3	54	45	18	240	H3	77	70	50	371	H3	103	85	73
322	Reef	13	POC	20	LN	15	3	I-RR3_98	0	H3	70	34	18	240	H3	92	56	46	371	H3	113	80	63
323	Reef	13	POC	20	LN	15	3	I-RR3_99	0	H3	71	36	30	240	H3	100	66	58	371	H3	117	90	77
324	Reef	13	POC	20	LN	15	3	I-RR3_100	0	H3	54	25	13	240	H3	81	46	44	371	H3	110	67	54
325	Reef	13	POC	20	LN	15	3	I-RR3_101	0	H3	59	26	17	240	H3	90	60	44	371	H3	108	90	80
326	Reef	13	POC	20	LN	15	3	I-RR3_102	0	H3	63	40	21	240	H3	90	60	50	371	H3	112	88	72
327	Reef	13	POC	20	LN	15	3	I-RR3_103	0	H3	69	41	17	240	H3	87	65	50	371	H3	105	80	70
328	Reef	13	POC	20	LN	15	3	I-RR3_104	0	H3	50	40	16	240	H3	82	47	42	371	H3	100	75	60
329	Reef	14	POC	20	LN	15	3	I-RR3_105	0	H3	63	47	37	240	H3	90	87	85	371	H3	105	88	77
330	Reef	14	POC	20	LN	15	3	I-RR3_106	0	H3	52	32	20	240	H3	74	66	45	371	H3	84	80	54
331	Reef	14	POC	20	LN	15	3	I-RR3_107	0	H3	47	35	34	240	H3	80	70	58	371	H3	98	90	64
332	Reef	14	POC	20	LN	15	3	I-RR3_108	0	H3	48	41	26	240	H3	80	69	58	371	H3	95	86	75
333	Reef	14	POC	20	LN	15	3	I-RR3_109	0	H3	58	45	24	240	H3	80	72	60	371	H3	97	85	80
334	Reef	14	POC	20	LN	15	3	I-RR3_110	0	H3	61	47	27	240	H3	90	80	56	371	H3	110	96	75
335	Reef	14	POC	20	LN	15	3	I-RR3_111	0	H3	54	39	26	240	H3	87	70	55	371	H3	102	80	72
336	Reef	14	POC	20	LN	15	3	I-RR3_112	0	H3	64	48	34	240	H3	85	75	70	371	H3	100	92	80
337	Lagoon	1	POC	10	VRR	5	0	LR1_1	0	H3	88	51	38	240	H3	120	92	75	371	H3	150	118	100
338	Lagoon	1	POC	10	VRR	5	0	LR1_2	0	H3	90	33	22	240	H3	113	97	77	371	H3	151	110	82
339	Lagoon	1	POC	10	VRR	5	0	LR1_3	0	H3	63	22	17	240	H3	106	66	56	371	H3	135	82	75
340	Lagoon	1	POC	10	VRR	5	0	LR1_4	0	H3	63	35	24	240	H2	90	77	58	371	H2	98	90	90
341	Lagoon	1	POC	10	VRR	5	0	LR1_5	0	H3	78	45	21	240	H3	117	92	66	371	H3	125	111	91
342	Lagoon	1	POC	10	VRR	5	0	LR1_6	0	H3	61	18	15	240	H3	82	62	57	371	H3	105	92	75
343	Lagoon	1	POC	10	VRR	5	0	LR1_7	0	H3	41	38	23	240	H3	84	75	72	371	H3	105	98	94
344	Lagoon	1	POC	10	VRR	5	0	LR1_8	0	H3	42	39	16	240	H3	88	80	60	371	H3	105	92	79
345	Lagoon	2	POC	10	VRR	5	0	LR1_9	0	H3	46	32	29	240	H3	94	85	70	371	H3	118	104	80
346	Lagoon	2	POC	10	VRR	5	0	LR1_10	0	H3	51	47	20	240	H3	102	75	75	371	H3	120	110	92
347	Lagoon	2	POC	10	VRR	5	0	LR1_11	0	H3	61	28	15	240	H3	97	82	75	371	H3	120	117	97
348	Lagoon	2	POC	10	VRR	5	0	LR1_12	0	H3	55	36	18	240	H3	105	95	92	371	H3	120	110	103
349	Lagoon	2	POC	10	VRR	5	0	LR1_13	0	H3	38	32	20	240	H3	90	67	63	371	H3	110	105	94
350	Lagoon	2	POC	10	VRR	5	0	LR1_14	0	H3	51	28	27	240	H3	90	80	80	371	H3	110	92	90
351	Lagoon	2	POC	10	VRR	5	0	LR1_15	0	H3	55	37	23	240	H3	103	85	70	371	H3	120	114	97
352	Lagoon	2	POC	10	VRR	5	0	LR1_16	0	H3	83	33	32	240	H3	104	92	78	371	H3	160	110	107
353	Lagoon	3	POC	10	VRR	5	0	LR1_17	0	H3	62	35	18	240	H2	87	62	60	371	H2	97	75	70
354	Lagoon	3	POC	10	VRR	5	0	LR1_18	0	H3	70	43	25	240	H3	97	82	75	371	H3	115	107	95
355	Lagoon	3	POC	10	VRR	5	0	LR1_19	0	H3	76	58	20	240	H3	104	100	67	371	H3	125	115	90
356	Lagoon	3	POC	10	VRR	5	0	LR1_20	0	H3	46	33	13	240	H3	80	57	50	371	H3	100	87	70
357	Lagoon	3	POC	10	VRR	5	0	LR1_21	0	H3	72	19	17	240	H3	105	70	68	371	H3	120	95	90
358	Lagoon	3	POC	10	VRR	5	0	LR1_22	0	H3	63	36	26	240	H3	90	70	57	371	H3	115	95	86
359	Lagoon	3	POC	10	VRR	5	0	LR1_23	0	H3	50	33	22	240	H3	82	60	50	371	H3	97	94	73
360	Lagoon	3	POC	10	VRR	5	0	LR1_24	0	H3	45	21	19	240	H3	83	60	55	371	H3	100	90	80
361	Lagoon	4	POC	10	VRR	5	0	LR1_25	0	H3	35	24	17	240	H3	62	60	42	371	H3	80	75	60
362	Lagoon	4	POC	10	VRR	5	0	LR1_26	0	H3	42	22	22	240	H3	72	70	52	371	H3	95	92	85
363	Lagoon	4	POC	10	VRR	5	0	LR1_27	0	H3	31	28	15	240	H3	71	50	48	371	H2	95	72	65
364	Lagoon	4	POC	10	VRR	5	0	LR1_28	0	H3	34	28	17	240	H3	71	60	60	371	H3	95	90	72
365	Lagoon	4	POC	10	VRR	5	0	LR1_29	0	H3	39	32	19	240	H3	90	65	38	371	H3	118	90	75
366	Lagoon	4	POC	10	VRR	5	0	LR1_30	0	H3	67	38	33	240	H3	100	90	86	371	H3	125	120	114
367	Lagoon	4	POC	10	VRR	5	0	LR1_31	0	H3	44	30	17	240	H3	77	57	42	371	H3	108	78	70
368	Lagoon	4	POC	10	VRR	5	0	LR1_32	0	H3	58	17	42	240	H3	105	72	65	371	H3	126	116	96
369	Lagoon	5	POC	10	VRR	5	0	LR1_33	0	H3	73	28	22	240	H3	120	90	80	371	H3	155	140	95
370	Lagoon	5	POC	10	VRR	5	0	LR1_34	0	H3	47	36	17	240	H3	100	95	60	371	H3	140	120	105
371	Lagoon	5	POC	10	VRR	5	0	LR1_35	0	H3	40	29	28	240	H3	96	72	65	371	H3	130	105	98
372	Lagoon	5	POC	10	VRR	5	0	LR1_36	0	H3	33	30	16	240	D				371	D
373	Lagoon	5	POC	10	VRR	5	0	LR1_37	0	H3	68	37	33	240	H3	120	87	82	371	H3	155	115	110
374	Lagoon	5	POC	10	VRR	5	0	LR1_38	0	H3	47	21	12	240	H2	93	58	57	371	H3	125	85	84
375	Lagoon	5	POC	10	VRR	5	0	LR1_39	0	H3	48	22	10	240	H3	92	60	60	371	H3	130	95	90
376	Lagoon	5	POC	10	VRR	5	0	LR1_40	0	H3	54	40	16	240	H3	96	85	62	371	H3	132	110	98
377	Lagoon	6	POC	10	VRR	5	0	LR1_41	0	H3	40	20	13	240	H3	62	50	40	371	H3	77	65	57
378	Lagoon	6	POC	10	VRR	5	0	LR1_42	0	H3	58	36	20	240	H3	60	53	50	371	H3	88	79	70
379	Lagoon	6	POC	10	VRR	5	0	LR1_43	0	H3	55	47	27	240	H3	90	78	63	371	H3	114	94	85
380	Lagoon	6	POC	10	VRR	5	0	LR1_44	0	H3	41	38	22	240	H3	92	82	63	371	H3	122	120	95
381	Lagoon	6	POC	10	VRR	5	0	LR1_45	0	H3	45	30	19	240	H3	91	80	71	371	H3	130	115	110
382	Lagoon	6	POC	10	VRR	5	0	LR1_46	0	H3	48	29	12	240	H3	91	84	70	371	H3	120	105	100
383	Lagoon	6	POC	10	VRR	5	0	LR1_47	0	H3	49	42	35	240	H3	100	98	30	371	H3	135	115	110
384	Lagoon	6	POC	10	VRR	5	0	LR1_48	0	H3	58	53	30	240	H3	92	66	62	371	H3	115	80	74
385	Lagoon	7	POC	10	VRR	5	0	LR1_49	0	H3	45	39	24	240	H3	100	96	66	371	H3	130	120	94
386	Lagoon	7	POC	10	VRR	5	0	LR1_50	0	H3	50	23	14	240	H3	100	80	72	371	H3	125	110	100
387	Lagoon	7	POC	10	VRR	5	0	LR1_51	0	H3	56	18	14	240	H3	95	75	70	371	H3	135	110	98
388	Lagoon	7	POC	10	VRR	5	0	LR1_52	0	H3	60	25	24	240	H3	110	95	80	371	H3	138	102	100
389	Lagoon	7	POC	10	VRR	5	0	LR1_53	0	H3	33	32	12	240	H3	85	80	70	371	H3	116	107	98
390	Lagoon	7	POC	10	VRR	5	0	LR1_54	0	H3	50	49	41	240	H3	105	97	93	371	H3	120	120	110
391	Lagoon	7	POC	10	VRR	5	0	LR1_55	0	H3	43	21	15	240	H3	95	80	70	371	H3	120	115	85
392	Lagoon	7	POC	10	VRR	5	0	LR1_56	0	H3	36	28	21	240	H3	80	78	70	371	H3	100	95	80
393	Lagoon	8	POC	20	LN	5	0	LR2_1	0	H3	60	52	23	240	H3	103	95	60	371	H3	125	110	90
394	Lagoon	8	POC	20	LN	5	0	LR2_2	0	H3	60	45	25	240	H3	107	90	65	371	H3	135	115	100
395	Lagoon	8	POC	20	LN	5	0	LR2_3	0	H3	54	40	25	240	H3	102	85	64	371	H3	140	105	102
396	Lagoon	8	POC	20	LN	5	0	LR2_4	0	H3	42	40	20	240	H3	85	70	50	371	H3	117	100	77
397	Lagoon	8	POC	20	LN	5	0	LR2_5	0	H3	55	44	33	240	H3	110	90	77	371	H3	135	115	105
398	Lagoon	8	POC	20	LN	5	0	LR2_6	0	H3	50	40	26	240	H3	90	72	62	371	H3	110	100	95
399	Lagoon	8	POC	20	LN	5	0	LR2_7	0	H3	55	41	22	240	H3	103	70	67	371	H3	130	93	85
400	Lagoon	8	POC	20	LN	5	0	LR2_8	0	H3	56	36	22	240	H3	105	73	67	371	H3	135	100	100
401	Lagoon	9	POC	20	LN	5	0	LR2_9	0	H3	46	30	27	240	H3	87	67	63	371	H3	120	120	100
402	Lagoon	9	POC	20	LN	5	0	LR2_10	0	H3	50	50	35	240	H3	87	85	85	371	H3	117	107	95
403	Lagoon	9	POC	20	LN	5	0	LR2_11	0	H3	55	48	30	240	H3	90	90	80	371	H3	120	120	110
404	Lagoon	9	POC	20	LN	5	0	LR2_12	0	H3	57	50	40	240	H3	105	100	90	371	H3	125	110	100
405	Lagoon	9	POC	20	LN	5	0	LR2_13	0	H3	55	40	40	240	H3	100	85	80	371	H3	130	125	120
406	Lagoon	9	POC	20	LN	5	0	LR2_14	0	H3	55	48	27	240	H3	90	86	70	371	H3	130	112	105
407	Lagoon	9	POC	20	LN	5	0	LR2_15	0	H3	48	32	27	240	H3	93	83	75	371	H3	130	120	110
408	Lagoon	9	POC	20	LN	5	0	LR2_16	0	H3	56	50	32	240	H3	107	87	84	371	H3	135	120	110
409	Lagoon	10	POC	20	LN	5	0	LR2_17	0	H3	43	28	17	240	H3	70	60	48	371	H3	98	95	72
410	Lagoon	10	POC	20	LN	5	0	LR2_18	0	H3	47	42	32	240	H3	82	78	60	371	H3	100	98	82
411	Lagoon	10	POC	20	LN	5	0	LR2_19	0	H3	40	30	20	240	H3	70	58	52	371	H3	90	80	70
412	Lagoon	10	POC	20	LN	5	0	LR2_20	0	H3	57	55	40	240	H3	95	86	75	371	H3	120	105	95
413	Lagoon	10	POC	20	LN	5	0	LR2_21	0	H3	50	40	34	240	H3	80	70	70	371	H3	95	85	82
414	Lagoon	10	POC	20	LN	5	0	LR2_22	0	H3	63	45	20	240	H3	91	91	60	371	H3	110	100	80
415	Lagoon	10	POC	20	LN	5	0	LR2_23	0	H3	43	40	26	240	H3	80	72	61	371	H3	100	92	84
416	Lagoon	10	POC	20	LN	5	0	LR2_24	0	H3	46	44	21	240	H3	77	71	55	371	H3	102	90	80
417	Lagoon	11	POC	20	LN	5	0	LR2_25	0	H3	51	26	20	240	H3	96	76	72	371	H3	125	112	105
418	Lagoon	11	POC	20	LN	5	0	LR2_26	0	H3	58	52	28	240	H3	106	102	90	371	H3	140	125	105
419	Lagoon	11	POC	20	LN	5	0	LR2_27	0	H3	46	44	38	240	H3	86	84	82	371	H3	120	118	100
420	Lagoon	11	POC	20	LN	5	0	LR2_28	0	H3	50	42	39	240	H3	87	80	73	371	H3	114	105	100
421	Lagoon	11	POC	20	LN	5	0	LR2_29	0	H3	46	37	26	240	H3	85	72	70	371	H3	115	92	80
422	Lagoon	11	POC	20	LN	5	0	LR2_30	0	H3	51	37	31	240	H3	85	72	70	371	H3	110	110	100
423	Lagoon	11	POC	20	LN	5	0	LR2_31	0	H3	35	29	28	240	H3	84	74	62	371	H3	107	103	90
424	Lagoon	11	POC	20	LN	5	0	LR2_32	0	H3	35	19	14	240	H3	60	57	57	371	H3	94	87	81
425	Lagoon	12	POC	20	LN	5	0	LR2_33	0	H3	44	42	27	240	H3	80	67	65	371	H3	100	98	85
426	Lagoon	12	POC	20	LN	5	0	LR2_34	0	H3	40	22	20	240	H3	70	69	69	371	H3	100	91	82
427	Lagoon	12	POC	20	LN	5	0	LR2_35	0	H3	44	36	20	240	H3	85	62	60	371	H3	110	91	85
428	Lagoon	12	POC	20	LN	5	0	LR2_36	0	H3	35	22	15	240	H3	67	56	46	371	H3	93	80	75
429	Lagoon	12	POC	20	LN	5	0	LR2_37	0	H3	52	42	28	240	H3	92	86	66	371	H3	120	115	100
430	Lagoon	12	POC	20	LN	5	0	LR2_38	0	H3	48	44	30	240	H3	90	78	74	371	H3	120	98	96
431	Lagoon	12	POC	20	LN	5	0	LR2_39	0	H3	37	27	27	240	H3	70	63	58	371	H3	94	93	76
432	Lagoon	12	POC	20	LN	5	0	LR2_40	0	H3	47	40	30	240	H3	84	71	70	371	H3	110	104	90
433	Lagoon	13	POC	20	LN	5	0	LR2_41	0	H3	51	45	20	240	H3	94	81	65	371	H3	120	110	95
434	Lagoon	13	POC	20	LN	5	0	LR2_42	0	H3	60	42	24	240	H3	90	67	48	371	H3	120	88	72
435	Lagoon	13	POC	20	LN	5	0	LR2_43	0	H3	44	23	17	240	H3	75	63	50	371	H3	100	80	78
436	Lagoon	13	POC	20	LN	5	0	LR2_44	0	H3	63	42	21	240	H3	100	86	66	371	H3	140	104	95
437	Lagoon	13	POC	20	LN	5	0	LR2_45	0	H3	44	30	20	240	H3	75	60	47	371	H3	99	87	80
438	Lagoon	13	POC	20	LN	5	0	LR2_46	0	H3	54	40	25	240	H3	93	75	48	371	H3	110	104	100
439	Lagoon	13	POC	20	LN	5	0	LR2_47	0	H3	56	42	34	240	H3	90	72	60	371	H3	110	90	80
440	Lagoon	13	POC	20	LN	5	0	LR2_48	0	H3	54	42	27	240	H3	87	80	68	371	H3	110	106	85
441	Lagoon	14	POC	20	LN	5	0	LR2_49	0	H3	42	27	14	240	H3	84	70	68	371	H3	112	96	89
442	Lagoon	14	POC	20	LN	5	0	LR2_50	0	H3	69	49	45	240	H3	100	80	72	371	H3	130	109	90
443	Lagoon	14	POC	20	LN	5	0	LR2_51	0	H3	46	41	24	240	H3	90	87	70	371	H3	120	116	105
444	Lagoon	14	POC	20	LN	5	0	LR2_52	0	H3	46	31	21	240	H3	90	78	78	371	H3	118	105	96
445	Lagoon	14	POC	20	LN	5	0	LR2_53	0	H3	63	50	32	240	H3	115	110	75	371	H3	135	130	100
446	Lagoon	14	POC	20	LN	5	0	LR2_54	0	H3	65	45	42	240	H3	106	100	89	371	H3	145	120	110
447	Lagoon	14	POC	20	LN	5	0	LR2_55	0	H3	60	55	30	240	H3	102	95	95	371	H3	140	120	120
448	Lagoon	14	POC	20	LN	5	0	LR2_56	0	H3	55	48	25	240	H3	100	96	70	371	H3	130	115	110

## Sheet: A HEALTH
Fragment_ID	Habitat	Colony	Genus	Species	Orig_Nursery	Orig_Position	Depth	D_Group	Position	Days_T0	Survival_T0	Condition_T0	Fauna_T0	Predation_T0	Predation%_T0	Disease_T0	Days_T1.5	Survival_T1.5	Condition_T1.5	Fauna_T1.5	Predation_T1.5	Predation%_T1.5	Disease_T1.5	Days_T3	Survival_T3	Condition_T3	Fauna_T3	FaunaType_T3	Predation_T3	Predation%_T3	Disease_T3	Notes_T3	Days_T4	Survival_T4	Condition_T4	Fauna_T4	FaunaType_T4	Predation_T4	Predation%_T4	Disease_T4	Days_T5	Survival_T5	Condition_T5	Fauna_T5	FaunaType_T5	Predation_T5	Predation%_T5	Disease_T5	Notes T5
X_449	Reef	A_1	ACR	A.sp	COO-KG	N/A	5	1	II-RR1_1	0	1	H3	0	0	0	0	18	1	H3	0	0	0	0	222	1	H3	0		0	0	0	Pic	255	1	H3	0		0	0	0	283	1	H3	0		0	0	0
X_450	Reef	A_1	ACR	A.sp	COO-KG	N/A	5	1	II-RR1_2	0	1	H3	0	0	0	0	18	1	H3	0	0	0	0	222	1	H3	0		0	0	0		255	1	H3	0		0	0	0	283	1	H3	0		0	0	0
X_451	Reef	A_1	ACR	A.sp	COO-KG	N/A	5	1	II-RR1_3	0	1	H3	0	0	0	0	18	1	H3	0	0	0	0	222	1	H3	0		0	0	0		255	1	H3	0		0	0	0	283	1	H3	0		0	0	0
X_452	Reef	A_1	ACR	A.sp	COO-KG	N/A	5	1	II-RR1_4	0	1	H3	0	0	0	0	18	1	H3	0	0	0	0	222	1	H3	1	F	0	0	0		255	1	H3	0		0	0	0	283	1	H3	0		0	0	0
X_453	Reef	A_1	ACR	A.sp	COO-KG	N/A	5	1	II-RR1_5	0	1	H3	0	0	0	0	18	1	H3	0	0	0	0	222	1	H3	0		0	0	0		255	1	H3	0		0	0	0	283	1	H3	0		0	0	0
X_454	Reef	A_1	ACR	A.sp	COO-KG	N/A	5	1	II-RR1_6	0	1	H3	0	0	0	0	18	1	H3	0	0	0	0	222	1	H3	0		0	0	0		255	1	H3	0		0	0	0	283	1	H3	0		0	0	0
X_455	Reef	A_1	ACR	A.sp	COO-KG	N/A	5	1	II-RR1_7	0	1	H3	0	0	0	0	18	1	H3	0	0	0	0	222	1	H3	0		0	0	0		255	1	H3	0		0	0	0	283	1	H3	0		0	0	0
X_456	Reef	A_1	ACR	A.sp	COO-KG	N/A	5	1	II-RR1_8	0	1	H3	0	0	0	0	18	1	H3	0	0	0	0	222	1	H3	1	F	0	0	0	Pic: Fish	255	1	H3	0		0	0	0	283	1	H3	0		0	0	0
X_457	Reef	A_2	ACR	A.sp	COO-KG	N/A	5	1	II-RR1_9	0	1	H3	0	0	0	0	18	1	H3	0	0	0	0	222	1	H3	0		0	0	0	Pic	255	1	H3	0		0	0	0	283	1	H3	0		0	0	0
X_458	Reef	A_2	ACR	A.sp	COO-KG	N/A	5	1	II-RR1_10	0	1	H3	0	0	0	0	18	1	H3	0	0	0	0	222	1	H3	0		0	0	0		255	1	H3	0		0	0	0	283	1	H3	0		0	0	0
X_459	Reef	A_2	ACR	A.sp	COO-KG	N/A	5	1	II-RR1_11	0	1	H3	0	0	0	0	18	1	H3	0	0	0	0	222	1	H2	0		0	0	0		255	1	H2	0		0	0	0	283	1	H2	0		0	0	0
X_460	Reef	A_2	ACR	A.sp	COO-KG	N/A	5	1	II-RR1_12	0	1	H3	0	0	0	0	18	1	H3	0	0	0	0	222	1	H3	0		0	0	0		255	1	H3	0		0	0	0	283	1	H3	0		0	0	0
X_461	Reef	A_2	ACR	A.sp	COO-KG	N/A	5	1	II-RR1_13	0	1	H3	0	0	0	0	18	1	H3	0	0	0	0	222	1	H3	0		0	0	0		255	1	H3	0		0	0	0	283	1	H3	0		0	0	0
X_462	Reef	A_2	ACR	A.sp	COO-KG	N/A	5	1	II-RR1_14	0	1	H3	0	0	0	0	18	1	H3	0	0	0	0	222	1	H1	0		0	0	0	Pic: Tissue loss through overgrowth	255	1	H1	0		0	0	0	283	0	D	0
X_463	Reef	A_2	ACR	A.sp	COO-KG	N/A	5	1	II-RR1_15	0	1	H3	0	0	0	0	18	1	H3	0	0	0	0	222	1	H3	0		0	0	0		255	1	H3	0		0	0	0	283	1	H3	0		0	0	0
X_464	Reef	A_2	ACR	A.sp	COO-KG	N/A	5	1	II-RR1_16	0	1	H3	0	0	0	0	18	1	H3	0	0	0	0	222	1	H3	0		0	0	0		255	1	H3	0		0	0	0	283	1	H3	0		0	0	0
X_465	Reef	A_3	ACR	A.sp	COO-KG	N/A	5	1	II-RR1_17	0	1	H3	0	0	0	0	18	1	H3	0	0	0	0	222	1	H3	0		0	0	0	Pic	255	1	H3	0		0	0	0	283	1	H3	0		0	0	0
X_466	Reef	A_3	ACR	A.sp	COO-KG	N/A	5	1	II-RR1_18	0	1	H3	0	0	0	0	18	1	H3	0	0	0	0	222	1	H3	0		0	0	0		255	1	H3	0		0	0	0	283	1	H3	0		0	0	0
X_467	Reef	A_3	ACR	A.sp	COO-KG	N/A	5	1	II-RR1_19	0	1	H3	0	0	0	0	18	1	H3	0	0	0	0	222	1	H3	0		0	0	0		255	1	H3	0		0	0	0	283	1	H3	0		0	0	0
X_468	Reef	A_3	ACR	A.sp	COO-KG	N/A	5	1	II-RR1_20	0	1	H3	0	0	0	0	18	1	H3	0	0	0	0	222	1	H3	0		0	0	0		255	1	H3	0		0	0	0	283	1	H3	0		0	0	0
X_469	Reef	A_3	ACR	A.sp	COO-KG	N/A	5	1	II-RR1_21	0	1	H3	0	0	0	0	18	1	H3	0	0	0	0	222	1	H3	0		0	0	0		255	1	H3	0		0	0	0	283	1	H3	0		0	0	0
X_470	Reef	A_3	ACR	A.sp	COO-KG	N/A	5	1	II-RR1_22	0	1	H3	0	0	0	0	18	1	H3	0	0	0	0	222	1	H3	0		0	0	0		255	1	H3	0		0	0	0	283	1	H3	0		0	0	0
X_471	Reef	A_3	ACR	A.sp	COO-KG	N/A	5	1	II-RR1_23	0	1	H3	0	0	0	0	18	1	H3	0	0	0	0	222	1	H3	0		0	0	0		255	1	H3	0		0	0	0	283	1	H3	0		0	0	0
X_472	Reef	A_3	ACR	A.sp	COO-KG	N/A	5	1	II-RR1_24	0	1	H3	0	0	0	0	18	1	H3	0	0	0	0	222	1	H3	0		0	0	0		255	1	H3	0		0	0	0	283	1	H3	0		0	0	0
X_473	Reef	A_4	ACR	A.sp	COO-KG	N/A	5	1	II-RR1_25	0	1	H3	0	0	0	0	18	1	H3	0	0	0	0	222	1	H3	0		0	0	0	Pic; strong algae growth on rope	255	1	H3	0		0	0	0	283	1	H3	0		0	0	0
X_474	Reef	A_4	ACR	A.sp	COO-KG	N/A	5	1	II-RR1_26	0	1	H3	0	0	0	0	18	1	H3	0	0	0	0	222	1	H3	0		0	0	0		255	1	H3	0		0	0	0	283	1	H3	1	C	0	0	0
X_475	Reef	A_4	ACR	A.sp	COO-KG	N/A	5	1	II-RR1_27	0	1	H3	0	0	0	0	18	1	H3	0	0	0	0	222	1	H3	0		0	0	0		255	1	H3	0		0	0	0	283	1	H3	0		0	0	0
X_476	Reef	A_4	ACR	A.sp	COO-KG	N/A	5	1	II-RR1_28	0	1	H3	0	0	0	0	18	1	H3	0	0	0	0	222	1	H3	0		0	0	0		255	1	H3	1	C	0	0	0	283	1	H3	0		0	0	0
X_477	Reef	A_4	ACR	A.sp	COO-KG	N/A	5	1	II-RR1_29	0	1	H3	0	0	0	0	18	1	H3	0	0	0	0	222	1	H3	0		0	0	0		255	1	H3	0		0	0	0	283	1	H3	0		0	0	0
X_478	Reef	A_4	ACR	A.sp	COO-KG	N/A	5	1	II-RR1_30	0	1	H3	0	0	0	0	18	1	H3	0	0	0	0	222	1	H2	0		0	0	0		255	1	H1	0		0	0	0	283	1	H1	0		0	0	0
X_479	Reef	A_4	ACR	A.sp	COO-KG	N/A	5	1	II-RR1_31	0	1	H3	0	0	0	0	18	1	H3	0	0	0	0	222	1	H3	0		0	0	0		255	1	H3	0		0	0	0	283	1	H3	1	C	0	0	0
X_480	Reef	A_4	ACR	A.sp	COO-KG	N/A	5	1	II-RR1_32	0	1	H3	0	0	0	0	18	1	H3	0	0	0	0	222	1	H3	0		0	0	0		255	1	H3	0		0	0	0	283	1	H3	0		0	0	0
X_481	Reef	A_5	ACR	A.sp	COO-KG	N/A	5	1	II-RR1_33	0	1	H3	0	0	0	0	18	1	H3	0	0	0	0	222	1	H3	0		0	0	0	Pic; strong algae growth on rope	255	1	H2	0		0	0	0	283	1	H2	0		0	0	0	A. Overgrowth from here reducing condition
X_482	Reef	A_5	ACR	A.sp	COO-KG	N/A	5	1	II-RR1_34	0	1	H3	0	0	0	0	18	1	H3	0	0	0	0	222	1	H3	0		0	0	0		255	1	H3	0		0	0	0	283	1	H3	0		1	5	0
X_483	Reef	A_5	ACR	A.sp	COO-KG	N/A	5	1	II-RR1_35	0	1	H3	0	0	0	0	18	1	H3	0	0	0	0	222	1	H3	0		0	0	0		255	1	H3	0		0	0	0	283	1	H3	0		1	5	0
X_484	Reef	A_5	ACR	A.sp	COO-KG	N/A	5	1	II-RR1_36	0	1	H3	0	0	0	0	18	1	H3	0	0	0	0	222	1	H2	0		0	0	0	Pic	255	1	H2	0		0	0	0	283	1	H2	0		0	0	0
X_485	Reef	A_5	ACR	A.sp	COO-KG	N/A	5	1	II-RR1_37	0	1	H3	0	0	0	0	18	1	H3	0	0	0	0	222	1	H3	0		0	0	0		255	1	H2	0		0	0	0	283	1	H2	0		0	0	0
X_486	Reef	A_5	ACR	A.sp	COO-KG	N/A	5	1	II-RR1_38	0	1	H3	0	0	0	0	18	1	H3	0	0	0	0	222	1	H3	0		0	0	0		255	1	H2	0		0	0	0	283	1	H2	0		0	0	0
X_487	Reef	A_5	ACR	A.sp	COO-KG	N/A	5	1	II-RR1_39	0	1	H3	0	0	0	0	18	1	H3	0	0	0	0	222	0	D	0					Pic: Overgrowth	255	0	D	0					283	0	D	0
X_488	Reef	A_5	ACR	A.sp	COO-KG	N/A	5	1	II-RR1_40	0	1	H3	0	0	0	0	18	1	H3	0	0	0	0	222	1	H1	0		0	0	0	Pic	255	1	H1	0		0	0	0	283	1	H1	0		0	0	0
X_489	Reef	A_6	ACR	A.sp	COO-KG	N/A	5	1	II-RR1_41	0	1	H3	0	0	0	0	18	1	H3	0	0	0	0	222	1	H3	0		0	0	0	Pic; strong algae growth on rope	255	1	H3	0		0	0	0	283	1	H3	0		0	0	0
X_490	Reef	A_6	ACR	A.sp	COO-KG	N/A	5	1	II-RR1_42	0	1	H3	0	0	0	0	18	1	H3	0	0	0	0	222	1	H1	0		0	0	0	Pic	255	1	H1	0		0	0	0	283	1	H1	0		0	0	0
X_491	Reef	A_6	ACR	A.sp	COO-KG	N/A	5	1	II-RR1_43	0	1	H3	0	0	0	0	18	1	H3	0	0	0	0	222	1	H1	0		0	0	0	Pic	255	1	H2	0		0	0	0	283	1	H1	0		0	0	0
X_492	Reef	A_6	ACR	A.sp	COO-KG	N/A	5	1	II-RR1_44	0	1	H3	0	0	0	0	18	1	H3	0	0	0	0	222	1	H3	0		0	0	0		255	1	H3	0		0	0	0	283	1	H2	0		0	0	0
X_493	Reef	A_6	ACR	A.sp	COO-KG	N/A	5	1	II-RR1_45	0	1	H3	0	0	0	0	18	1	H3	0	0	0	0	222	1	H3	0		0	0	0		255	1	H2	0		0	0	0	283	1	H2	0		0	0	0
X_494	Reef	A_6	ACR	A.sp	COO-KG	N/A	5	1	II-RR1_46	0	1	H3	0	0	0	0	18	1	H3	0	0	0	0	222	1	H1	0		0	0	0	Pic	255	1	H1	0		0	0	0	283	1	H1	0		0	0	0
X_495	Reef	A_6	ACR	A.sp	COO-KG	N/A	5	1	II-RR1_47	0	1	H3	0	0	0	0	18	1	H3	0	0	0	0	222	1	H3	0		0	0	0		255	1	H3	0		0	0	0	283	1	H3	0		0	0	0
X_496	Reef	A_6	ACR	A. sp	COO-KG	N/A	5	1	II-RR1_48	0	1	H3	0	0	0	0	18	1	H3	0	0	0	0	222	1	H2	0		0	0	0	Pic	255	1	H2	0		0	0	0	283	1	H2	0		0	0	0
X_497	Lagoon	A_1	ACR	A.sp	COO-KG	N/A	5	0	LR3_1	0	1	H3	0	0	0	0	18	1	H3	0	0	0	0	222	1	H2	0		0	0	0		255	1	H2	1	C	0	0	0	283	1	H2	0		0	0	0
X_498	Lagoon	A_1	ACR	A.sp	COO-KG	N/A	5	0	LR3_2	0	1	H3	0	0	0	0	18	1	H3	0	0	0	0	222	1	H3	0		0	0	0		255	1	H2	0		0	0	1	283	1	H2	0		0	0	1
X_499	Lagoon	A_1	ACR	A.sp	COO-KG	N/A	5	0	LR3_3	0	1	H3	0	0	0	0	18	1	H3	0	0	0	0	222	1	H2	1	C C	0	0	0	Pic: Crabs; O15%	255	1	H2	0		0	0	0	283	1	H2	0		0	0	1
X_500	Lagoon	A_1	ACR	A.sp	COO-KG	N/A	5	0	LR3_4	0	1	H3	0	0	0	0	18	1	H3	0	0	0	0	222	1	H3	0		0	0	0		255	1	H2	0		0	0	1	283	1	H2	0		0	0	1
X_501	Lagoon	A_1	ACR	A.sp	COO-KG	N/A	5	0	LR3_5	0	1	H3	0	0	0	0	18	1	H3	0	0	0	0	222	1	H2	0		0	0	1	Pic: Fresh Tissue loss due D? 5%	255	1	H1	0		0	0	1	283	1	H1	0		0	0	1	A overgrowth
X_502	Lagoon	A_1	ACR	A.sp	COO-KG	N/A	5	0	LR3_6	0	1	H3	0	0	0	0	18	1	H3	0	0	0	0	222	1	H3	0		0	0	0		255	1	H3	1	C	0	0	0	283	1	H2	1	C	0	0	1
X_503	Lagoon	A_1	ACR	A.sp	COO-KG	N/A	5	0	LR3_7	0	1	H3	0	0	0	0	18	1	H3	0	0	0	0	222	1	H2	0		0	0	0		255	1	H2	1	C	0	0	0	283	1	H1	1		0	0	1
X_504	Lagoon	A_1	ACR	A.sp	COO-KG	N/A	5	0	LR3_8	0	1	H3	0	0	0	0	18	1	H3	0	0	0	0	222	1	H3	0		0	0	0		255	1	H1	0		0	0	1	283	1	H1	0		0	0	1
X_505	Lagoon	A_2	ACR	A.sp	COO-KG	N/A	5	0	LR3_9	0	1	H3	0	0	0	0	18	1	H3	0	0	0	0	222	1	H2	1	C	0	0	0	Pic; O20%	255	1	H2	0		0	0	0	283	1	H2	0		0	0	0
X_506	Lagoon	A_2	ACR	A.sp	COO-KG	N/A	5	0	LR3_10	0	1	H3	0	0	0	0	18	1	H3	0	0	0	0	222	1	H2	1	C	0	0	0	Pic; O15%	255	1	H2	0		0	0	1	283	1	H1	0		0	0	1
X_507	Lagoon	A_2	ACR	A.sp	COO-KG	N/A	5	0	LR3_11	0	1	H3	0	0	0	0	18	1	H3	0	0	0	0	222	1	H2	0		0	0	1	Pic; O20%	255	1	H2	0		0	0	0	283	1	H1	0		0	0	1
X_508	Lagoon	A_2	ACR	A.sp	COO-KG	N/A	5	0	LR3_12	0	1	H3	0	0	0	0	18	1	H3	0	0	0	0	222	1	H3	0		0	0	0		255	1	H2	0		0	0	0	283	1	H1	0		0	0	0	A overgrowth
X_509	Lagoon	A_2	ACR	A.sp	COO-KG	N/A	5	0	LR3_13	0	1	H3	0	0	0	0	18	1	H3	0	0	0	0	222	1	H2	1	C	0	0	0	Pic; O15%	255	1	H2	0		0	0	0	283	1	H2	1	C	0	0	1
X_510	Lagoon	A_2	ACR	A.sp	COO-KG	N/A	5	0	LR3_14	0	1	H3	0	0	0	0	18	1	H3	0	0	0	0	222	1	H2	0		0	0	0	Pic; O10%	255	1	H2	0		0	0	0	283	1	H2	1	C	0	0	1
X_511	Lagoon	A_2	ACR	A.sp	COO-KG	N/A	5	0	LR3_15	0	1	H3	0	0	0	0	18	1	H3	0	0	0	0	222	1	H2	0		0	0	0	Pic; O10%	255	1	H2	0		0	0	1	283	1	H2	0		0	0	1
X_512	Lagoon	A_2	ACR	A.sp	COO-KG	N/A	5	0	LR3_16	0	1	H3	0	0	0	0	18	1	H3	0	0	0	0	222	1	H2	0		0	0	1	Pic:Fresh 10%	255	1	H2	0		0	0	0	283	1	H2	1	C	0	0	0
X_513	Lagoon	A_3	ACR	A.sp	COO-KG	N/A	5	0	LR3_17	0	1	H3	0	0	0	0	18	1	H3	0	0	0	0	222	1	H2	0		0	0	0	Pic; O20%	255	1	H2	0		0	0	0	283	1	H2	0		0	0	0
X_514	Lagoon	A_3	ACR	A.sp	COO-KG	N/A	5	0	LR3_18	0	1	H3	0	0	0	0	18	1	H3	0	0	0	0	222	1	H2	0		0	0	0	Pic; O5%	255	1	H2	0		0	0	1	283	1	H2	1	C	0	0	1
X_515	Lagoon	A_3	ACR	A.sp	COO-KG	N/A	5	0	LR3_19	0	1	H3	0	0	0	0	18	1	H3	0	0	0	0	222	1	H3	0		0	0	0		255	1	H2	0		0	0	0	283	1	H2	1	C	0	0	1
X_516	Lagoon	A_3	ACR	A.sp	COO-KG	N/A	5	0	LR3_20	0	1	H3	0	0	0	0	18	1	H3	0	0	0	0	222	1	H2	0		0	0	0	Pic; O20%	255	1	H2	0		0	0	0	283	1	H2	0		0	0	0
X_517	Lagoon	A_3	ACR	A.sp	COO-KG	N/A	5	0	LR3_21	0	1	H3	0	0	0	0	18	1	H3	0	0	0	0	222	1	H1	0		0	0	0	Pic; O55%	255	1	H1	0		0	0	0	283	0	D	0		0	0
X_518	Lagoon	A_3	ACR	A.sp	COO-KG	N/A	5	0	LR3_22	0	1	H3	0	0	0	0	18	1	H2	0	0	0	1	222	1	H2	0		0	0	1	Pic; O5% , fresh 20%	255	1	H2	0		0	0	0	283	1	H2	0		0	0	1
X_519	Lagoon	A_3	ACR	A.sp	COO-KG	N/A	5	0	LR3_23	0	1	H3	0	0	0	0	18	1	H3	0	0	0	0	222	1	H2	1	C	0	0	0	Pic; O5%	255	1	H2	0		0	0	1	283	1	H1	0		0	0	1
X_520	Lagoon	A_3	ACR	A.sp	COO-KG	N/A	5	0	LR3_24	0	1	H3	0	0	0	0	18	1	H3	0	0	0	0	222	1	H2	1	C	0	0	0	Pic; O15%	255	1	H2	1	C	0	0	1	283	1	H2	1	C	0	0	1
X_521	Lagoon	A_4	ACR	A.sp	COO-KG	N/A	5	0	LR3_25	0	1	H3	0	0	0	0	18	1	H3	0	0	0	0	222	1	H3	1	C	0	0	0	Pic	255	1	H2	0		0	0	1	283	1	H2	1	C,C	0	0	1
X_522	Lagoon	A_4	ACR	A.sp	COO-KG	N/A	5	0	LR3_26	0	1	H3	0	0	0	0	18	1	H3	0	0	0	0	222	1	H2	1	C	0	0	0		255	1	H2	0		0	0	1	283	1	H2	0		0	0	1
X_523	Lagoon	A_4	ACR	A.sp	COO-KG	N/A	5	0	LR3_27	0	1	H3	0	0	0	0	18	1	H3	0	0	0	0	222	1	H2	1	C	0	0	0	Pic; O10%	255	1	H2	0		0	0	0	283	1	H2	0		0	0	0
X_524	Lagoon	A_4	ACR	A.sp	COO-KG	N/A	5	0	LR3_28	0	1	H3	0	0	0	0	18	1	H2	0	0	0	1	222	1	H2	0		0	0	0	Pic; O10%	255	1	H2	0		0	0	0	283	1	H2	1	C	0	0	0
X_525	Lagoon	A_4	ACR	A.sp	COO-KG	N/A	5	0	LR3_29	0	1	H3	0	0	0	0	18	1	H3	0	0	0	0	222	1	H3	0		0	0	0		255	1	H2	0		0	0	1	283	1	H2	0		0	0	1
X_526	Lagoon	A_4	ACR	A.sp	COO-KG	N/A	5	0	LR3_30	0	1	H3	0	0	0	0	18	1	H3	0	0	0	0	222	1	H2	0		0	0	1	Pic:Fresh 20%	255	1	H2	0		0	0	1	283	1	H1	0		0	0	1
X_527	Lagoon	A_4	ACR	A.sp	COO-KG	N/A	5	0	LR3_31	0	1	H3	0	0	0	0	18	1	H3	0	0	0	0	222	1	H2	1	C C	0	0	1	Pic:Fresh 5%	255	1	H2	0		0	0	1	283	1	H2	1	C,C	0	0	1
X_528	Lagoon	A_4	ACR	A.sp	COO-KG	N/A	5	0	LR3_32	0	1	H3	0	0	0	0	18	1	H3	0	0	0	0	222	1	H3	1	C	0	0	0		255	1	H3	0		0	0	0	283	1	H2	1	C	0	0	1
X_529	Lagoon	A_5	ACR	A.sp	COO-KG	N/A	5	0	LR3_33	0	1	H3	0	0	0	0	18	1	H2	0	0	0	1	222	0	D	0						255	0	D	1	C,C				283	0	D	0
X_530	Lagoon	A_5	ACR	A.sp	COO-KG	N/A	5	0	LR3_34	0	1	H3	0	0	0	0	18	1	H3	0	0	0	0	222	1	H2	0		0	0	0	Pic; O15%	255	1	H1	1	C,C	0	0	0	283	1	H1	0		0	0	0
X_531	Lagoon	A_5	ACR	A.sp	COO-KG	N/A	5	0	LR3_35	0	1	H3	0	0	0	0	18	1	H3	0	0	0	0	222	0	D	0						255	0	D	0					283	0	D	0
X_532	Lagoon	A_5	ACR	A.sp	COO-KG	N/A	5	0	LR3_36	0	1	H3	0	0	0	0	18	1	H2	0	0	0	1	222	1	H2	0		0	0	0	Pic; O20%	255	1	H2	1	C	0	0	0	283	1	H2	0		0	0	0
X_533	Lagoon	A_5	ACR	A.sp	COO-KG	N/A	5	0	LR3_37	0	1	H3	0	0	0	0	18	1	H3	0	0	0	0	222	0	D	0						255	0	D	1	C				283	0	D	0
X_534	Lagoon	A_5	ACR	A.sp	COO-KG	N/A	5	0	LR3_38	0	1	H3	0	0	0	0	18	1	H2	0	0	0	1	222	0	D	0					Pic: over pipe	255	0	D	0					283	0	D	0
X_535	Lagoon	A_5	ACR	A.sp	COO-KG	N/A	5	0	LR3_39	0	1	H3	0	0	0	0	18	1	H3	0	0	0	0	222	0	D	0						255	0	D	1	CC				283	0	D	0
X_536	Lagoon	A_5	ACR	A.sp	COO-KG	N/A	5	0	LR3_40	0	1	H3	0	0	0	0	18	1	H3	0	0	0	0	222	1	H1	0		0	0	0	Pic; O75%	255	1	H1	1	C	0	0	0	283	1	H1	0		0	0	0
X_537	Lagoon	A_6	ACR	A.sp	COO-KG	N/A	5	0	LR3_41	0	1	H3	0	0	0	0	18	1	H3	0	0	0	0	222	1	H2	1	C	0	0	0	Pic; O25%	255	1	H2	1	C	0	0	0	283	1	H2	1	C	0	0	0
X_538	Lagoon	A_6	ACR	A.sp	COO-KG	N/A	5	0	LR3_42	0	1	H3	0	0	0	0	18	1	H3	0	0	0	0	222	1	H2	0		0	0	0	Pic; O20%	255	1	H2	0		0	0	1	283	1	H1	0		0	0	1
X_539	Lagoon	A_6	ACR	A.sp	COO-KG	N/A	5	0	LR3_43	0	1	H3	0	0	0	0	18	1	H3	0	0	0	0	222	1	H3	0		0	0	0		255	1	H2	1	C	0	0	1	283	1	H2	1	C	0	0	1
X_540	Lagoon	A_6	ACR	A.sp	COO-KG	N/A	5	0	LR3_44	0	1	H3	0	0	0	0	18	1	H3	0	0	0	0	222	1	H1	0		0	0	0	Pic; O85%	255	1	H1	0		0	0	0	283	1	H1	0		0	0	0
X_541	Lagoon	A_6	ACR	A.sp	COO-KG	N/A	5	0	LR3_45	0	1	H3	0	0	0	0	18	1	H3	0	0	0	0	222	1	H2	0		0	0	0	Pic; O20%	255	1	H2	1	C	0	0	1	283	1	H1	0		0	0	1
X_542	Lagoon	A_6	ACR	A.sp	COO-KG	N/A	5	0	LR3_46	0	1	H3	0	0	0	0	18	1	H3	0	0	0	0	222	0	D	0						255	0	D	0					283	0	D	0
X_543	Lagoon	A_6	ACR	A.sp	COO-KG	N/A	5	0	LR3_47	0	1	H3	0	0	0	0	18	1	H3	0	0	0	0	222	1	H2	1	C	0	0	0	Pic; O5%	255	1	H2	1	C,C	0	0	1	283	1	H2	1	C	0	0	1
X_544	Lagoon	A_6	ACR	A.sp	COO-KG	N/A	5	0	LR3_48	0	1	H3	0	0	0	0	18	1	H3	0	0	0	0	222	1	H3	1	C	0	0	0		255	1	H2	1	C	0	0	0	283	1	H2	1	C	0	0	1
[truncated: 17 more columns]

## Sheet: A GROWTH
Fragment_ID	Habitat	Colony	Genus	Orig_Nursery	Depth	D_Group	Position	Days_T0	Condition_T0	M1_T0	M2_T0	M3_T0	Days_T3	Condition_T3	M1_T3	M2_T3	M3_T3	Days_T7	Condition_T7	M1_T7	M2_T7	M3_T7
X_449	Reef	A_1	ACR	COO-KG	5	1	II-RR1_1	0	H3	50	19	15	222	H3	68	40	32	353	H3	83	73	42
X_450	Reef	A_1	ACR	COO-KG	5	1	II-RR1_2	0	H3	43	20	15	222	H3	56	37	33	353	H3	68	68	47
X_451	Reef	A_1	ACR	COO-KG	5	1	II-RR1_3	0	H3	42	15	14	222	H3	61	40	29	353	H3	76	65	40
X_452	Reef	A_1	ACR	COO-KG	5	1	II-RR1_4	0	H3	64	26	24	222	H3	83	55	44	353	H3	95	80	58
X_453	Reef	A_1	ACR	COO-KG	5	1	II-RR1_5	0	H3	42	29	15	222	H3	66	56	30	353	H3	97	73	50
X_454	Reef	A_1	ACR	COO-KG	5	1	II-RR1_6	0	H3	53	28	22	222	H3	69	46	36	353	H3	90	68	55
X_455	Reef	A_1	ACR	COO-KG	5	1	II-RR1_7	0	H3	60	40	30	222	H3	90	70	48	353	H3	110	90	70
X_456	Reef	A_1	ACR	COO-KG	5	1	II-RR1_8	0	H3	65	30	25	222	H3	93	67	45	353	H3	107	88	69
X_457	Reef	A_2	ACR	COO-KG	5	1	II-RR1_9	0	H3	62	12	12	222	H3	84	45	44	353	H3	114	70	60
X_458	Reef	A_2	ACR	COO-KG	5	1	II-RR1_10	0	H3	62	17	14	222	H3	92	50	45	353	H3	120	95	75
X_459	Reef	A_2	ACR	COO-KG	5	1	II-RR1_11	0	H3	48	38	28	222	H2	64	46	35	353	H2	79	75	60
X_460	Reef	A_2	ACR	COO-KG	5	1	II-RR1_12	0	H3	51	13	11	222	H3	72	35	30	353	H3	100	72	58
X_461	Reef	A_2	ACR	COO-KG	5	1	II-RR1_13	0	H3	40	31	13	222	H3	70	50	40	353	H3	95	87	70
X_462	Reef	A_2	ACR	COO-KG	5	1	II-RR1_14	0	H3	61	38	14	222	H1	65	32	23	353	D
X_463	Reef	A_2	ACR	COO-KG	5	1	II-RR1_15	0	H3	67	43	31	222	H3	103	63	45	353	H3	140	87	75
X_464	Reef	A_2	ACR	COO-KG	5	1	II-RR1_16	0	H3	46	42	30	222	H3	83	70	55	353	H3	117	100	93
X_465	Reef	A_3	ACR	COO-KG	5	1	II-RR1_17	0	H3	66	12	10	222	H3	77	27	22	353	H3	87	38	31
X_466	Reef	A_3	ACR	COO-KG	5	1	II-RR1_18	0	H3	61	31	20	222	H3	86	40	30	353	H3	100	52	50
X_467	Reef	A_3	ACR	COO-KG	5	1	II-RR1_19	0	H3	57	51	20	222	H3	77	50	23	353	H3	88	56	40
X_468	Reef	A_3	ACR	COO-KG	5	1	II-RR1_20	0	H3	64	34	27	222	H3	95	50	42	353	H3	101	82	63
X_469	Reef	A_3	ACR	COO-KG	5	1	II-RR1_21	0	H3	58	46	32	222	H3	95	82	53	353	H3	115	98	75
X_470	Reef	A_3	ACR	COO-KG	5	1	II-RR1_22	0	H3	86	40	34	222	H3	122	57	48	353	H3	140	77	67
X_471	Reef	A_3	ACR	COO-KG	5	1	II-RR1_23	0	H3	90	46	30	222	H3	125	85	65	353	H3	150	105	95
X_472	Reef	A_3	ACR	COO-KG	5	1	II-RR1_24	0	H3	106	55	24	222	H3	125	80	52	353	H3	140	80	58
X_473	Reef	A_4	ACR	COO-KG	5	1	II-RR1_25	0	H3	46	30	12	222	H3	79	58	48	353	H3	102	87	85
X_474	Reef	A_4	ACR	COO-KG	5	1	II-RR1_26	0	H3	46	45	30	222	H3	95	70	65	353	H3	120	110	100
X_475	Reef	A_4	ACR	COO-KG	5	1	II-RR1_27	0	H3	58	35	34	222	H3	90	82	64	353	H3	112	98	75
X_476	Reef	A_4	ACR	COO-KG	5	1	II-RR1_28	0	H3	40	38	38	222	H3	100	70	62	353	H3	125	90	90
X_477	Reef	A_4	ACR	COO-KG	5	1	II-RR1_29	0	H3	65	35	25	222	H3	90	90	64	353	H3	110	98	90
X_478	Reef	A_4	ACR	COO-KG	5	1	II-RR1_30	0	H3	41	30	25	222	H2	62	34	22	353	H1	72	40	30
X_479	Reef	A_4	ACR	COO-KG	5	1	II-RR1_31	0	H3	42	34	20	222	H3	83	47	42	353	H3	85	55	49
X_480	Reef	A_4	ACR	COO-KG	5	1	II-RR1_32	0	H3	47	37	31	222	H3	90	74	47	353	H3	105	90	62
X_481	Reef	A_5	ACR	COO-KG	5	1	II-RR1_33	0	H3	74	15	14	222	H3	89	30	22	353	H2	110	65	42
X_482	Reef	A_5	ACR	COO-KG	5	1	II-RR1_34	0	H3	73	16	16	222	H3	110	37	31	353	H2	140	70	64
X_483	Reef	A_5	ACR	COO-KG	5	1	II-RR1_35	0	H3	54	27	22	222	H3	100	40	37	353	H3	140	75	65
X_484	Reef	A_5	ACR	COO-KG	5	1	II-RR1_36	0	H3	48	22	15	222	H2	66	30	20	353	H2	85	50	40
X_485	Reef	A_5	ACR	COO-KG	5	1	II-RR1_37	0	H3	51	15	12	222	H3	65	25	17	353	H2	90	45	36
X_486	Reef	A_5	ACR	COO-KG	5	1	II-RR1_38	0	H3	59	36	24	222	H3	74	57	52	353	H2	82	80	65
X_487	Reef	A_5	ACR	COO-KG	5	1	II-RR1_39	0	H3	50	33	13	222	D				353	D
X_488	Reef	A_5	ACR	COO-KG	5	1	II-RR1_40	0	H3	53	20	17	222	H1	65	35	25	353	H1	75	25	20
X_489	Reef	A_6	ACR	COO-KG	5	1	II-RR1_41	0	H3	47	25	17	222	H3	62	50	40	353	H2	66	66	60
X_490	Reef	A_6	ACR	COO-KG	5	1	II-RR1_42	0	H3	65	55	45	222	H1	72	56	36	353	H1	80	60	55
X_491	Reef	A_6	ACR	COO-KG	5	1	II-RR1_43	0	H3	47	37	23	222	H1	50	33	28	353	H1	63	50	35
X_492	Reef	A_6	ACR	COO-KG	5	1	II-RR1_44	0	H3	45	33	32	222	H3	70	56	53	353	H2	94	80	70
X_493	Reef	A_6	ACR	COO-KG	5	1	II-RR1_45	0	H3	35	22	20	222	H3	58	38	30	353	H2	66	40	40
X_494	Reef	A_6	ACR	COO-KG	5	1	II-RR1_46	0	H3	55	32	22	222	H1	50	46	35	353	H1	66	60	30
X_495	Reef	A_6	ACR	COO-KG	5	1	II-RR1_47	0	H3	27	27	20	222	H3	57	50	39	353	H2	60	55	44
X_496	Reef	A_6	ACR	COO-KG	5	1	II-RR1_48	0	H3	45	27	16	222	H2	56	52	39	353	H2	67	65	50
X_497	Lagoon	A_1	ACR	COO-KG	5	0	LR3_1	0	H3	42	21	14	222	H2	55	31	31	353	H2	60	48	47
X_498	Lagoon	A_1	ACR	COO-KG	5	0	LR3_2	0	H3	40	20	16	222	H3	60	43	29	353	H2	63	50	38
X_499	Lagoon	A_1	ACR	COO-KG	5	0	LR3_3	0	H3	67	24	22	222	H2	97	57	37	353	H2	91	50	46
X_500	Lagoon	A_1	ACR	COO-KG	5	0	LR3_4	0	H3	40	18	18	222	H3	62	35	32	353	H2	67	45	45
X_501	Lagoon	A_1	ACR	COO-KG	5	0	LR3_5	0	H3	60	30	25	222	H2	84	50	45	353	H1	85	52	50
X_502	Lagoon	A_1	ACR	COO-KG	5	0	LR3_6	0	H3	64	26	16	222	H3	95	50	40	353	H2	100	55	47
X_503	Lagoon	A_1	ACR	COO-KG	5	0	LR3_7	0	H3	56	27	20	222	H2	73	34	30	353	H1	85	40	38
X_504	Lagoon	A_1	ACR	COO-KG	5	0	LR3_8	0	H3	49	25	17	222	H3	78	28	23	353	H1	72	38	37
X_505	Lagoon	A_2	ACR	COO-KG	5	0	LR3_9	0	H3	46	24	12	222	H2	67	43	28	353	H2	74	65	48
X_506	Lagoon	A_2	ACR	COO-KG	5	0	LR3_10	0	H3	54	30	15	222	H2	74	44	34	353	H1	75	51	48
X_507	Lagoon	A_2	ACR	COO-KG	5	0	LR3_11	0	H3	44	23	11	222	H2	61	48	25	353	D
X_508	Lagoon	A_2	ACR	COO-KG	5	0	LR3_12	0	H3	56	17	15	222	H3	70	40	32	353	H1	74	56	46
X_509	Lagoon	A_2	ACR	COO-KG	5	0	LR3_13	0	H3	60	48	30	222	H2	85	60	44	353	H2	90	70	58
X_510	Lagoon	A_2	ACR	COO-KG	5	0	LR3_14	0	H3	77	30	14	222	H2	100	45	45	353	H2	105	60	52
X_511	Lagoon	A_2	ACR	COO-KG	5	0	LR3_15	0	H3	72	36	23	222	H2	105	50	48	353	H2	115	80	68
X_512	Lagoon	A_2	ACR	COO-KG	5	0	LR3_16	0	H3	42	37	34	222	H2	85	54	40	353	H2	110	75	70
X_513	Lagoon	A_3	ACR	COO-KG	5	0	LR3_17	0	H3	50	16	12	222	H2	65	36	26	353	H2	75	57	50
X_514	Lagoon	A_3	ACR	COO-KG	5	0	LR3_18	0	H3	108	35	25	222	H2	130	60	45	353	H1	133	65	55
X_515	Lagoon	A_3	ACR	COO-KG	5	0	LR3_19	0	H3	60	20	16	222	H3	85	62	47	353	H1	82	62	58
X_516	Lagoon	A_3	ACR	COO-KG	5	0	LR3_20	0	H3	60	33	14	222	H2	82	60	31	353	H1
X_517	Lagoon	A_3	ACR	COO-KG	5	0	LR3_21	0	H3	72	62	54	222	H1	80	65	55	353	D
X_518	Lagoon	A_3	ACR	COO-KG	5	0	LR3_22	0	H3	84	42	42	222	H2	106	50	50	353	H1	112	55	43
X_519	Lagoon	A_3	ACR	COO-KG	5	0	LR3_23	0	H3	111	40	24	222	H2	115	60	60	353	H1	130	60	55
X_520	Lagoon	A_3	ACR	COO-KG	5	0	LR3_24	0	H3	86	41	35	222	H2	120	55	47	353	H1	130	82	50
X_521	Lagoon	A_4	ACR	COO-KG	5	0	LR3_25	0	H3	50	29	29	222	H3	82	60	53	353	H2	100	87	80
X_522	Lagoon	A_4	ACR	COO-KG	5	0	LR3_26	0	H3	53	43	37	222	H2	87	67	64	353	H2	96	82	78
X_523	Lagoon	A_4	ACR	COO-KG	5	0	LR3_27	0	H3	46	32	28	222	H2	77	70	50	353	H1	85	80	50
X_524	Lagoon	A_4	ACR	COO-KG	5	0	LR3_28	0	H3	62	50	20	222	H2	100	60	60	353	H2	120	84	80
X_525	Lagoon	A_4	ACR	COO-KG	5	0	LR3_29	0	H3	45	22	15	222	H3	65	50	40	353	H2	80	66	52
X_526	Lagoon	A_4	ACR	COO-KG	5	0	LR3_30	0	H3	35	32	22	222	H2	60	44	40	353	H1	65	48	36
X_527	Lagoon	A_4	ACR	COO-KG	5	0	LR3_31	0	H3	59	50	40	222	H2	95	92	80	353	H2	130	120	95
X_528	Lagoon	A_4	ACR	COO-KG	5	0	LR3_32	0	H3	58	34	34	222	H3	85	65	64	353	H2	105	96	85
X_529	Lagoon	A_5	ACR	COO-KG	5	0	LR3_33	0	H3	67	25	16	222	D				353	D
X_530	Lagoon	A_5	ACR	COO-KG	5	0	LR3_34	0	H3	67	20	16	222	H2	82	25	21	353	H1	93	38	32
X_531	Lagoon	A_5	ACR	COO-KG	5	0	LR3_35	0	H3	56	22	16	222	D				353	D
X_532	Lagoon	A_5	ACR	COO-KG	5	0	LR3_36	0	H3	71	34	17	222	H2	80	35	29	353	H2	90	50	48
X_533	Lagoon	A_5	ACR	COO-KG	5	0	LR3_37	0	H3	62	42	22	222	D				353	D
X_534	Lagoon	A_5	ACR	COO-KG	5	0	LR3_38	0	H3	60	22	12	222	D				353	D
X_535	Lagoon	A_5	ACR	COO-KG	5	0	LR3_39	0	H3	57	16	12	222	D				353	D
X_536	Lagoon	A_5	ACR	COO-KG	5	0	LR3_40	0	H3	56	30	25	222	H1	55	30	30	353	D
X_537	Lagoon	A_6	ACR	COO-KG	5	0	LR3_41	0	H3	48	40	32	222	H2	70	40	35	353	H2	90	70	57
X_538	Lagoon	A_6	ACR	COO-KG	5	0	LR3_42	0	H3	45	42	15	222	H2	60	40	25	353	H1	87	45	31
X_539	Lagoon	A_6	ACR	COO-KG	5	0	LR3_43	0	H3	43	22	17	222	H3	58	40	24	353	H2	68	60	52
X_540	Lagoon	A_6	ACR	COO-KG	5	0	LR3_44	0	H3	50	33	25	222	H1	58	42	30	353	H1	70	45	40
X_541	Lagoon	A_6	ACR	COO-KG	5	0	LR3_45	0	H3	40	26	24	222	H2	55	47	45	353	H1	60	55	45
X_542	Lagoon	A_6	ACR	COO-KG	5	0	LR3_46	0	H3	50	22	22	222	D				353	D
X_543	Lagoon	A_6	ACR	COO-KG	5	0	LR3_47	0	H3	58	56	42	222	H2	90	72	67	353	H2	110	85	76
X_544	Lagoon	A_6	ACR	COO-KG	5	0	LR3_48	0	H3	48	47	30	222	H3	101	80	60	353	H2	120	100	75
